# Supplementary material
Source: Royal Society of Chemistry journal article supplement (doi:10.1039/d6py00241b)
Supplement: d6py00241b1.pdf [file d6py00241b1.pdf]

*Supporting information for*

**Synthesis of Topologically Controlled Functional Polyethylenes:  
Combining C–H Activation with Copolymerization of Ethylene  
and Polar Monomers by Scandium Catalyst**

Yingzi Tan<sup>a</sup>, Yang Yang<sup>c</sup>, Zhaomin Hou<sup>d,e</sup> and Haobing Wang<sup>\*a,b</sup>

Ms. Y. Tan, Prof. H. Wang

<sup>a</sup> Advanced Institute for Soft Matter Science and Technology (AISMST), School of Emergent Soft Matter, State Key Laboratory of Pulp and Paper Engineering, South China University of Technology, Guangzhou 510640, China.

<sup>b</sup> Guangdong Provincial Key Laboratory of Functional and Intelligent Hybrid Materials and Devices, Guangdong Basic Research Center of Excellence for Energy and Information Polymer Materials, South China University of Technology, 510640 Guangzhou, China

E-mail: haobingwang@scut.edu.cn

Prof. Y. Yang

<sup>c</sup> College of Materials and Chemical Engineering, South China Agricultural University, 510630 Guangzhou, China

Prof. Z. Hou

<sup>d</sup> Advanced Catalysis Research Group, RIKEN Center for Sustainable Resource Science; 2-1 Hirosawa, Wako, Saitama 351-0198, Japan

<sup>e</sup> Organometallic Chemistry Laboratory, RIKEN Cluster for Pioneering Research, 2-1 Hirosawa, Wako, Saitama 351-0198, Japan

**Table of Contents**

|                                                    |    |
|----------------------------------------------------|----|
| <i>Supporting information for</i> .....            | 1  |
| <b>1. Materials and methods</b> .....              | 3  |
| <b>2. Preparation of polar monomers</b> .....      | 4  |
| <b>3. Characterization of polar monomers</b> ..... | 6  |
| <b>4. General Polymerization Procedures</b> .....  | 9  |
| <b>5. Characterization of copolymers</b> .....     | 11 |
| <b>6. References</b> .....                         | 64 |

## 1. Materials and methods

4-Vinylanisole (AR, 98%), 4-trans-propenyl-anisole (AR, 98%), P-Dimethylaminobenzaldehyde (AR, 99%), 4-Methylmercaptobenzaldehyde (RG, 98%), Potassium tert-butoxide (RG, 99%), 2,5-Norbornadiene (AR, 98%), 4-Iodoanisole (RG, 99%), 4-Bromo-N,N-Dimethylaniline (RG, >98%), (4-Iodophenyl)(Methyl)Sulfane (RG, 99%), n-Butyllithium (1.3 M n-hexane), N,N-Dimethyl-o-toluidine (AR, 99%), 1,2,3,4,5-Pentamethylcyclopenta-1,3-diene (AR, 99%), 4-Allylanisole (RG, 98%) and Dichlorobis(Triphenylphosphine)Palladium(II) (RG, 98%) were obtained from Adamas-beta. Methyltriphenylphosphonium Bromide (AR, >99.5%), N,N-Dimethylformamide (GC, >99.9%), Calcium hydride (AR, 99%), Ethyl acetate (AR, 99.5%), 2,5-Dimethoxybromobenzene (AR, 96%), Dichloromethane (AR, 99.5%) and Methanol (AR, 99.5 %) were obtained from Energy Chemical. Diisopropylamine (AR, 99%), Formic acid (AR, 98%), Sodium Chloride (AR, 99%) and Sodium Sulfate (AR, 99%) were obtained from Greagent. Anhydrous scandium chloride, Triphenylmethylium tetrakis(pentafluorophenyl)borate were obtained from Jilin University. 1,2,3,4-Tetramethyl-5-(trimethylsilyl)-1,3-cyclopentadiene (AR, 97%) was obtained from Aladdin. Toluene (HPLC, 99.9 %), n-hexane (HPLC, 99.9 %) and Tetrahydrofuran (HPLC, 99.9 %) were obtained from Yinli. The deuterated solvents Chloroform-d (99.8 atom% D) 1,1,2,2-Tetrachloroethane-d2 (99.6 atom% D) and Benzene-d6 (99.5 atom% D) were obtained from Energy Chemical.

All experiments were carried out under a dry and oxygen-free nitrogen atmosphere by using Schlenk techniques or under a nitrogen atmosphere in an MIKROUNA SUPER glovebox. The nitrogen was purified by being passed through a Dryclean column (4A molecular sieves) and a Gasclean GC-XR column. The nitrogen in the glovebox was constantly circulated through a copper/molecular sieves (4A) catalyst unit. The oxygen and moisture concentrations in the glovebox atmosphere were monitored by an O<sub>2</sub>/H<sub>2</sub>O Combi-Analyzer (MIKROUNA) to ensure both were always below 0.1 ppm. Solvents were purified by an MIKROUNA Solv Purer G5 Solvent Purification System and dried over fresh Na chips and molecular sieves in the glovebox (MIKROUNA). Rare-earth catalysts Cp'Sc(CH<sub>2</sub>C<sub>6</sub>H<sub>4</sub>NMe<sub>2</sub>-o)<sub>2</sub> (**Sc-1**: Cp' = C<sub>5</sub>Me<sub>5</sub>).

**Sc-2:** Cp' = C<sub>5</sub>Me<sub>4</sub>SiMe<sub>3</sub>), were synthesized according to the literatures <sup>s1, s2</sup>. All polar monomers were dried over CaH<sub>2</sub> before use and vacuum transferred prior to polymerization experiment.

The nuclear magnetic resonance (NMR) spectra were recorded on a 400/500 MHz (Bruker, Fällanden, Switzerland) spectrometer (or JEOL JMTC-500/54/JJ NMR instrument) with Chloroform-d (CDCl<sub>3</sub> at 26.8 °C), Benzene-d<sub>6</sub> (C<sub>6</sub>D<sub>6</sub> 26.8 °C) and 1,1,2,2-Tetrachloroethane-d<sub>2</sub> (1,1,2,2-C<sub>2</sub>D<sub>2</sub>Cl<sub>4</sub> at 120 °C) as solvent. The chemical shifts for <sup>1</sup>H NMR were recorded in ppm downfield from tetramethylsilane (TMS) with the solvent resonance as the internal standard (7.16 ppm for C<sub>6</sub>D<sub>6</sub>, 7.26 ppm for CDCl<sub>3</sub>, 6.0 ppm for 1,1,2,2-C<sub>2</sub>D<sub>2</sub>Cl<sub>4</sub>). The chemical shifts for <sup>13</sup>C{<sup>1</sup>H} NMR were recorded in ppm downfield using the central peak of C<sub>6</sub>D<sub>6</sub> (128.06 ppm) CDCl<sub>3</sub> (77.16 ppm), 1,1,2,2-C<sub>2</sub>D<sub>2</sub>Cl<sub>4</sub> (73.78 ppm) as the internal standard. The molecular weights and the molecular weight distributions of all the copolymers were determined at 150 °C by high temperature gel permeation chromatography (HT-GPC) on an HLC-8321GPC/HT apparatus (Tosoh Corporation) (or PL-GPC220 apparatus (Agilent Corporation)). 1,2-Dichlorobenzene (*o*-DCB) or 1,2,4-trichlorobenzene (TCB) was employed as an eluent at a flow rate of 1.0 mL/min. The calibration was made by using a polystyrene standard (Agilent Corporation). Differential scanning calorimetry (DSC) measurements were performed on a DSC 2500 (Mettler Toledo DSC 3) (or DSC 7000X (HITACHI)) at a rate of 10 °C/min. Any thermal history difference in the polymers was eliminated by first heating the specimen to 180 °C, cooling at 10 °C/min to -60 °C and then recording the second DSC scan.

## 2. Preparation of polar monomers.

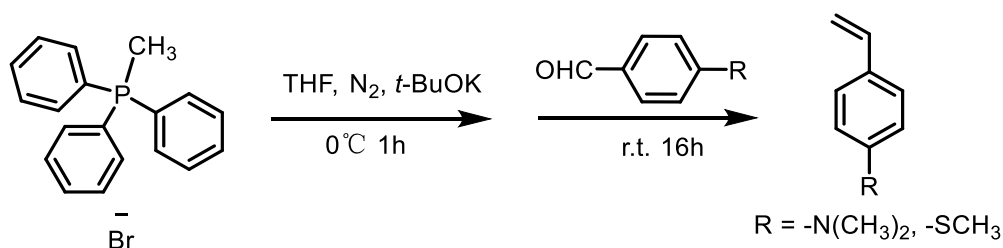

According to literature procedure<sup>s3</sup>, an oven-dried 250 mL round-bottom flask, equipped with a nitrogen atmosphere, was charged with t-BuOK (3.70 g, 33 mmol, 1.1 equiv.),

methyltriphenylphosphonium bromide (11.8 g, 33 mmol, 1.1 equiv.), and anhydrous THF (100 mL). The mixture was stirred at 0 °C for 1 hour, after which benzaldehyde (30 mmol) was added, and the reaction was allowed to proceed at room temperature for 16 hours. The reaction mixture was then quenched with saturated aqueous NaHCO<sub>3</sub>, and the resulting biphasic solution was extracted three times with ethyl acetate (AcOEt). The combined organic layer was dried over Na<sub>2</sub>SO<sub>4</sub>, filtered, and concentrated under reduced pressure. The residue was purified by column chromatography on silica gel using hexane/AcOEt as the eluent, yielding 4-VN or 4-VS as colorless oils.

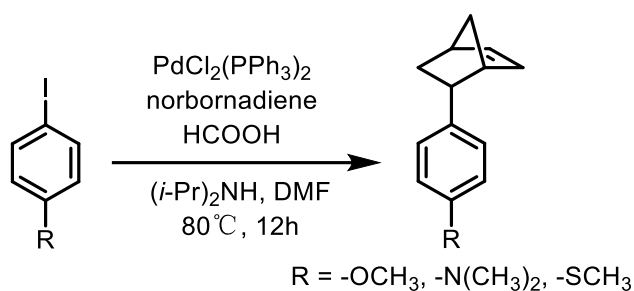

According to literature procedures<sup>s4</sup>, iodide (8.5 mmol) and PdCl<sub>2</sub>(PPh<sub>3</sub>)<sub>2</sub> (II) (126 mg, 179 μmol) were placed in a Schlenk flask with a stir bar. The flask was evacuated and backfilled with nitrogen three times before addition of bicyclo[2.2.1]hepta-2,5-diene (4 mL, 39.3 mmol), DMF (40 mL) and diisopropylamine (10 mL). The reaction flask was then subjected to three cycles of freeze-pump-thaw, after which formic acid (2 mL, 5.30 mmol) was added dropwise, and the mixture was heated at 80 °C overnight. Upon cooling to room temperature, the mixture was diluted with CH<sub>2</sub>Cl<sub>2</sub> and washed with water and brine several times. The organic layer was dried over Na<sub>2</sub>SO<sub>4</sub>, filtered, and the solvent was removed under reduced pressure, after which the crude product was purified by column chromatography on silica gel using hexane/AcOEt as the eluent, yielding the product as a viscous oil.

### 3. Characterization of polar monomers.

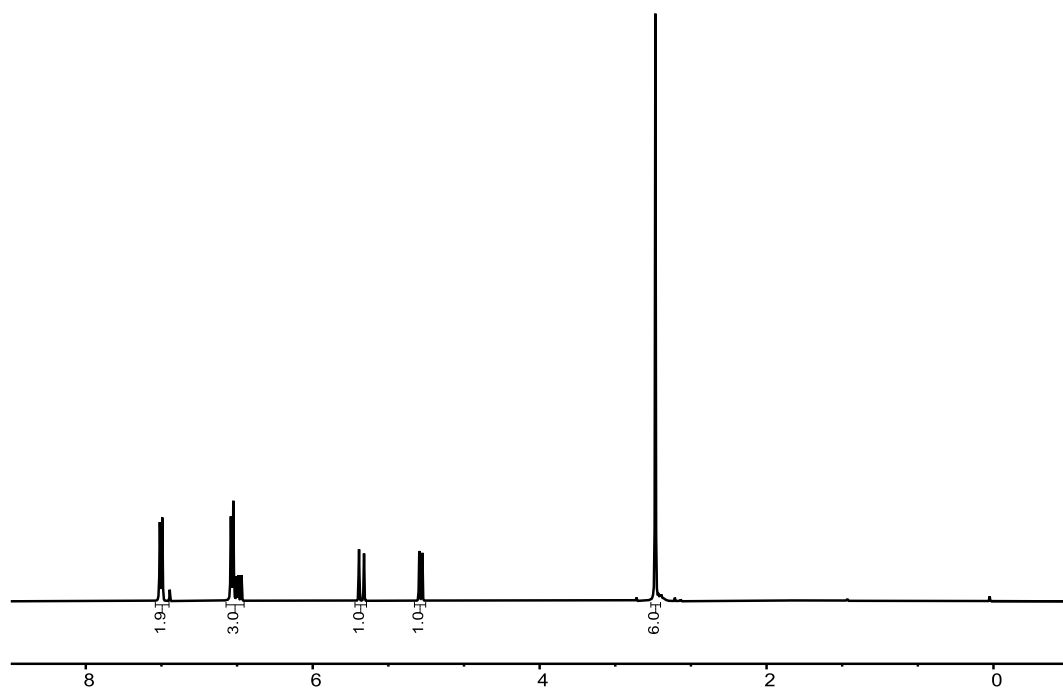

**Figure S1.** <sup>1</sup>H NMR spectrum (CDCl<sub>3</sub>, 26.8 °C) of *N,N*-dimethyl-4-vinylaniline (**4-VN**).

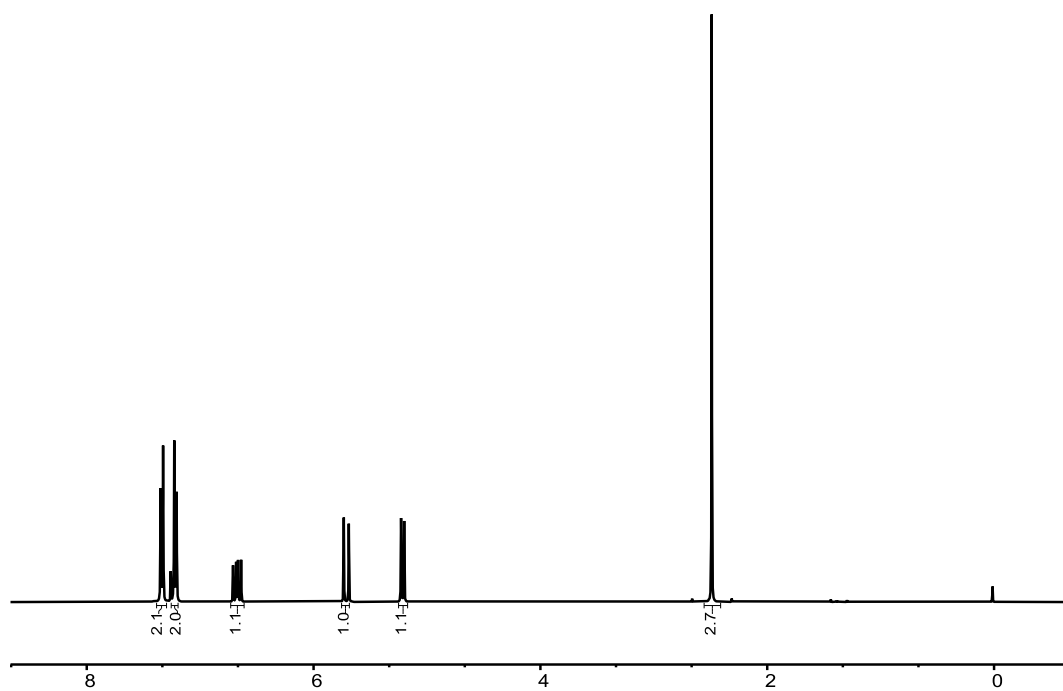

**Figure S2.** <sup>1</sup>H NMR spectrum (CDCl<sub>3</sub>, 26.8 °C) of methyl(4-vinylphenyl)sulfane (**4-VS**).

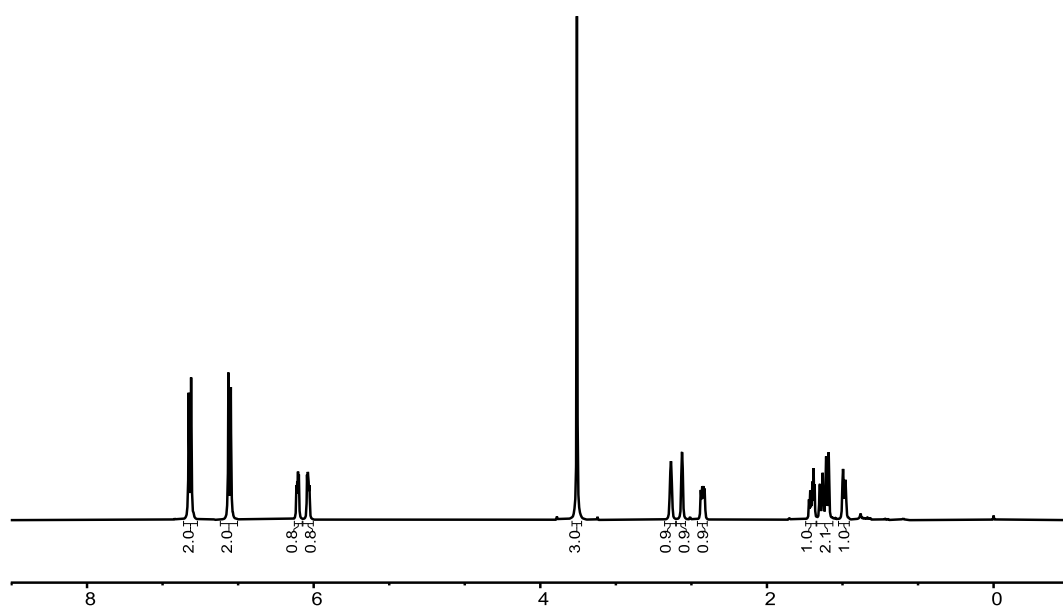

**Figure S3.**  $^1\text{H}$  NMR spectrum ( $\text{CDCl}_3$ ,  $26.8\text{ }^\circ\text{C}$ ) of 5-(4-methoxyphenyl)bicyclo[2.2.1]hept-2-ene (4-NBA).

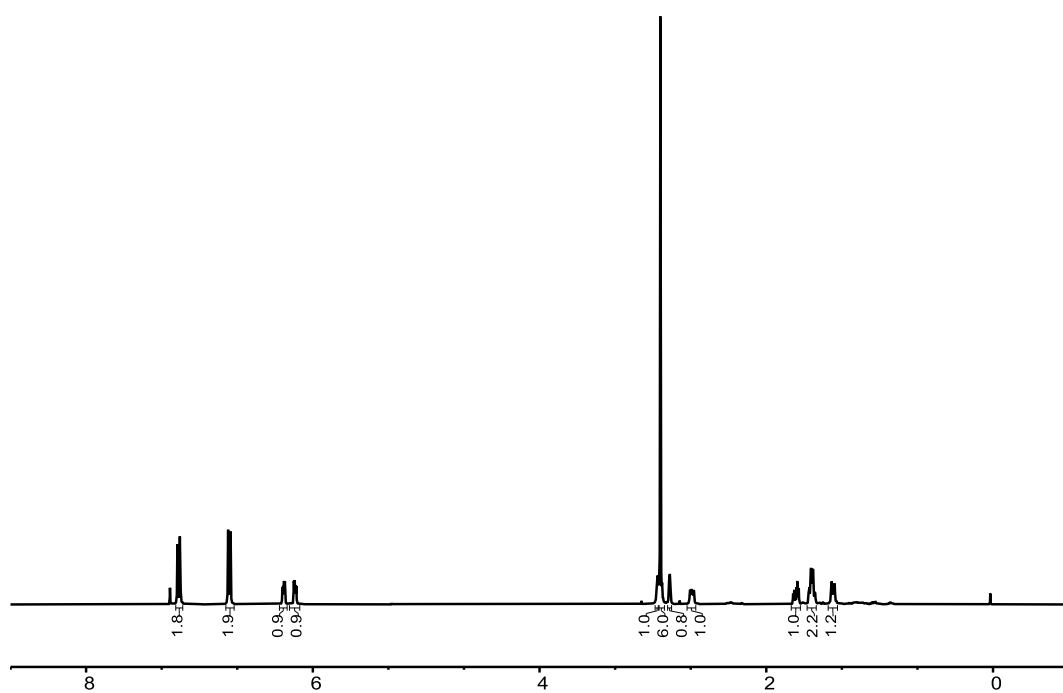

**Figure S4.**  $^1\text{H}$  NMR spectrum ( $\text{CDCl}_3$ ,  $26.8\text{ }^\circ\text{C}$ ) of 4-(bicyclo[2.2.1]hept-5-en-2-yl)-*N,N*-dimethylaniline (4-NBN).

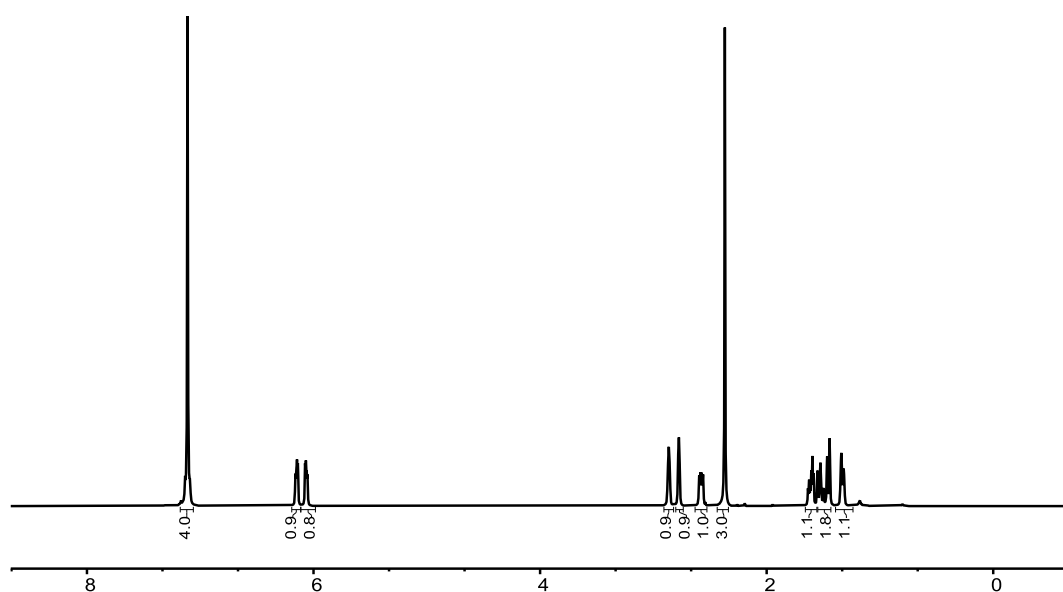

**Figure S5.**  $^1\text{H}$  NMR spectrum ( $\text{CDCl}_3$ ,  $26.8\text{ }^\circ\text{C}$ ) of (4-(bicyclo[2.2.1]hept-5-en-2-yl)phenyl)(methyl)sulfane (**4-NBS**).

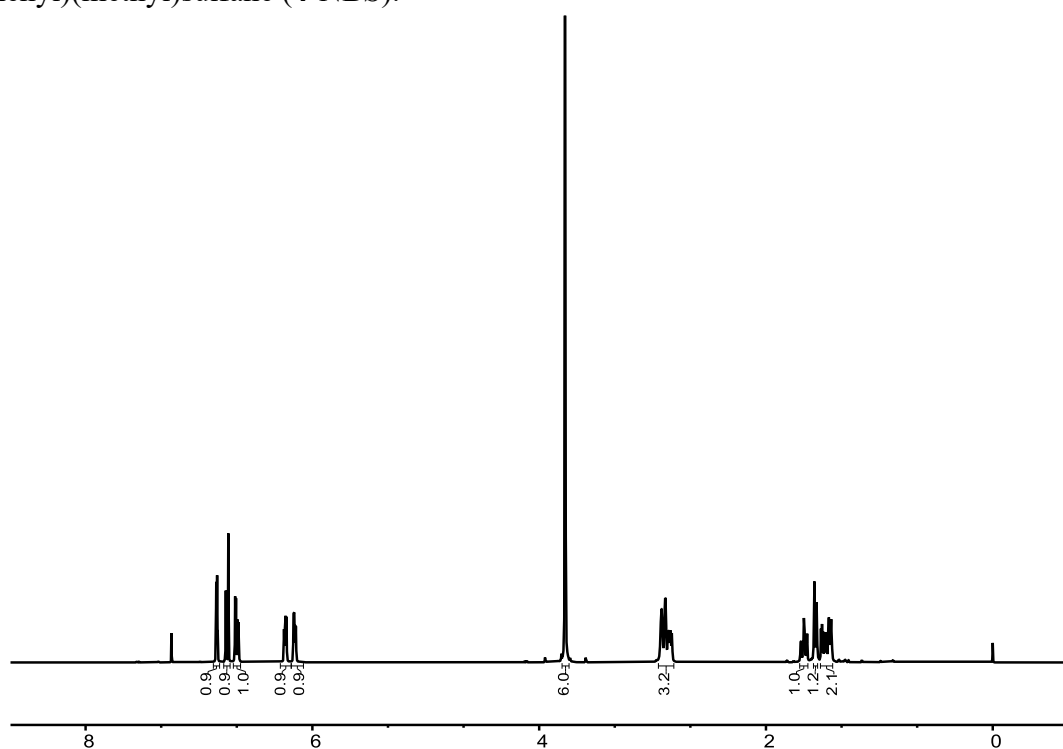

**Figure S6.**  $^1\text{H}$  NMR spectrum ( $\text{CDCl}_3$ ,  $26.8\text{ }^\circ\text{C}$ ) of 5-(2,5-dimethoxyphenyl)bicyclo[2.2.1]hept-2-ene (**DMB-NBD**).

#### 4. General Polymerization Procedures.

In a THF-free glovebox, a toluene solution (48 mL) of polar monomer was charged into a three-necked flask with a magnetic stir bar. The flask was taken outside, set in an oil bath (25 °C or 70 °C), and connected to a well-purged Schlenk ethylene line and a paraffin oil-sealed stopper by use of a three-way cock. Ethylene (1 atm) was introduced into the system and was saturated in the solution by stirring for 2 min. A toluene solution (2 mL) of  $[\text{Ph}_3\text{C}][\text{B}(\text{C}_6\text{F}_5)_4]$  (18.5 mg, 0.02 mmol) and  $\text{Cp}'\text{Sc}(\text{CH}_2\text{C}_6\text{H}_4\text{NMe}_2\text{-}o)_2$  (**Sc-1**-8.9 mg, **Sc-2**-10.2 mg, 0.02 mmol) as then added through a syringe under vigorous stirring. When the polymerization was achieved at the indicated time, MeOH (150 mL) was added at the end of the reaction. The polymer product was collected by filtration, washed with methanol, and then dried in vacuum at 60 °C to a constant weight. The resulting polymer was soluble in deuterated 1,1,2,2-tetrachloroethane under heating. The content of polar monomers in the copolymer was calculated by  $^1\text{H}$  NMR analysis.

**Table S1.** copolymerization of anisole derivatives with ethylene by half-sandwich rare-earth catalysts<sup>[a]</sup>.

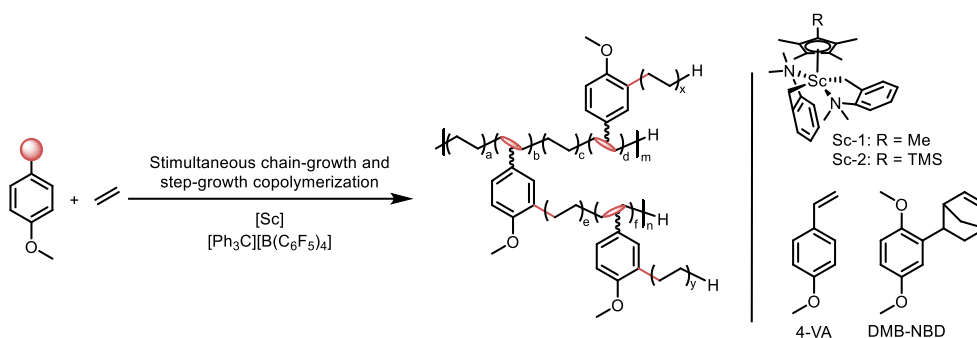

| Entry | M       | Ln   | [M]:[Ln] | Time (h) | Yield (g) <sup>[b]</sup> | Conversion (%) <sup>[c]</sup> | Activity                                                   |                                 |                          | Incorp. ([O].mol%) <sup>[e]</sup> | mol % of C-H activation <sup>[e]</sup> | $T_m$ <sup>[f]</sup> |
|-------|---------|------|----------|----------|--------------------------|-------------------------------|------------------------------------------------------------|---------------------------------|--------------------------|-----------------------------------|----------------------------------------|----------------------|
|       |         |      |          |          |                          |                               | (kg·Ln <sup>-1</sup> ·mol <sup>-1</sup> ·h <sup>-1</sup> ) | $M_n$ (× kg/mol) <sup>[d]</sup> | $M_w/M_n$ <sup>[d]</sup> |                                   |                                        |                      |
| 1     | -       | Sc-1 | -        | 10 min   | 0.63                     | -                             | 190                                                        | 76                              | 2.93                     | -                                 | -                                      | 135                  |
| 2     | 4-VA    | Sc-1 | 100:1    | 5        | 3.69                     | 100                           | 36.9                                                       | 52.6                            | 4.3                      | 1.6                               | 100                                    | 126/131              |
| 3     | 4-VA    | Sc-1 | 500:1    | 15       | 1.02                     | 56                            | 3.4                                                        | 3.6                             | 1.8                      | 37                                | 70                                     | n.o                  |
| 4     | 4-VA    | Sc-1 | 500:1    | 27       | 7.10                     | 100                           | 13.1                                                       | 63.8                            | 2.6                      | 4.7                               | 100                                    | 124/129              |
| 5     | 4-VA    | Sc-2 | 100:1    | 0.7      | 0.65                     | 92                            | 46.4                                                       | 13.1                            | 2.2                      | 11.3                              | 70                                     | 86/107               |
| 6     | 4-VA    | Sc-2 | 100:1    | 1.1      | 1.09                     | 100                           | 49.5                                                       | 17.7                            | 2.5                      | 6.4                               | 90                                     | 104/131              |
| 7     | 4-VA    | Sc-2 | 500:1    | 1        | 0.66                     | 32                            | 33                                                         | 5.0                             | 3.8                      | 28.8                              | 40                                     | n.o                  |
| 8     | 4-VA    | Sc-2 | 500:1    | 7        | 2.80                     | 100                           | 20                                                         | 167.6                           | 1.3                      | 16.5                              | 70                                     | 110                  |
| 9     | DMB-NBD | Sc-1 | 100:1    | 2        | 1.47                     | 89                            | 36.8                                                       | 19.2                            | 2.0                      | 4.5                               | 50                                     | 110                  |
| 10    | DMB-NBD | Sc-1 | 100:1    | 3        | 3.7                      | 100                           | 61.7                                                       | 33.1                            | 2.6                      | 1.7                               | 100                                    | 128                  |

[a] Conditions: [Ln] (0.02 mmol), [Ph<sub>3</sub>C][B(C<sub>6</sub>F<sub>5</sub>)<sub>4</sub>] (0.02 mmol), ethylene (1 atm), 50 mL toluene, Temperature (70 °C). [b] Yield of final polymer. [c] Conversion of polar monomers. [d] Determined by GPC in *o*-DCB at 150 °C against polystyrene standard. [e] Determined by <sup>1</sup>H NMR analysis. [f] Determined by differential scanning calorimetry.

## 5. Characterization of copolymers

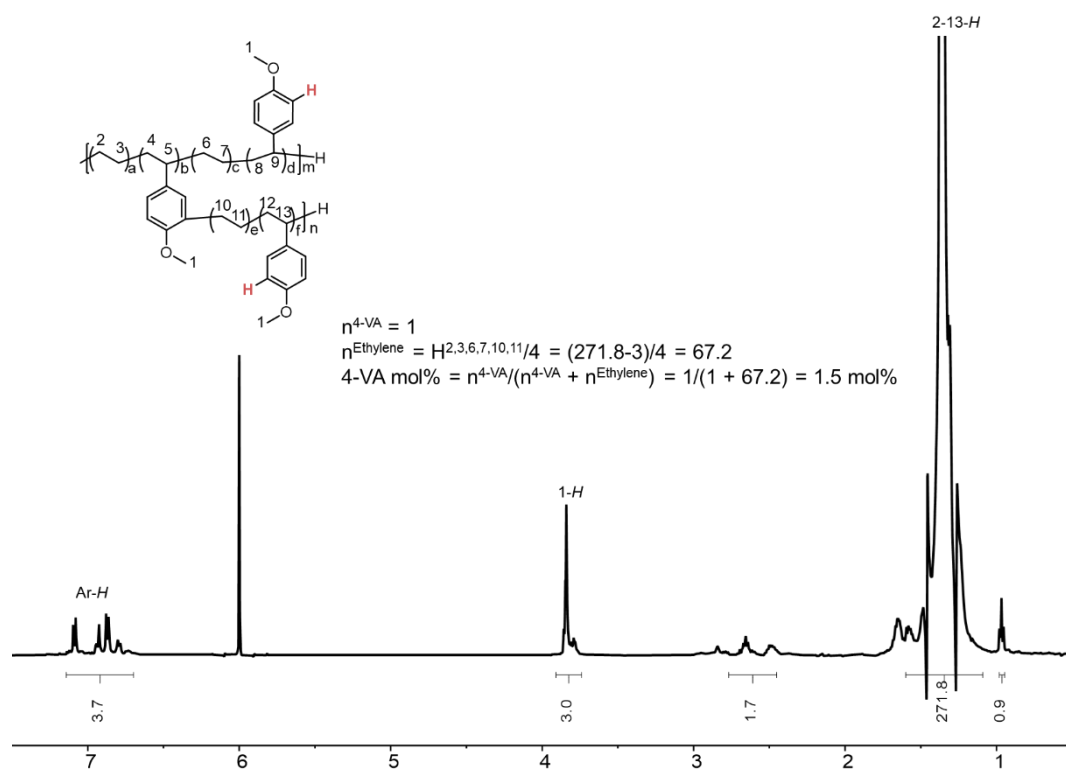

**Figure S7.**  $^1\text{H}$  NMR spectrum of the polymer from Table 1, Entry 1 (1,1,2,2-Tetrachloroethane- $d_2$ ).

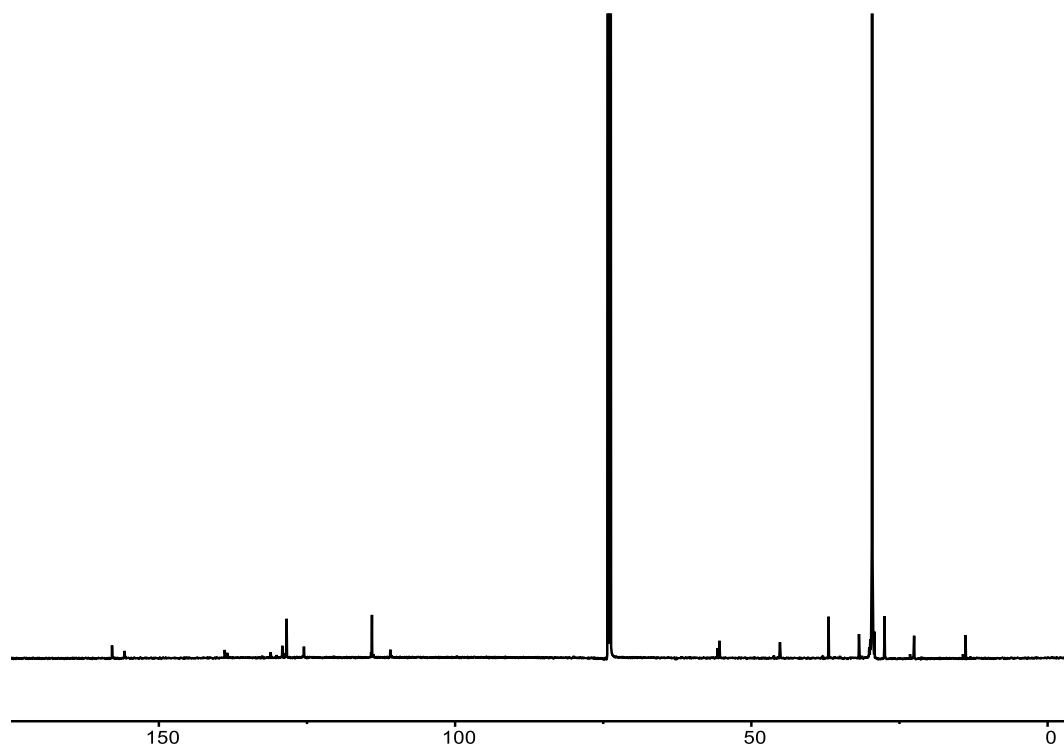

**Figure S8.**  $^{13}\text{C}$  NMR spectrum of the polymer from Table 1, Entry 1 (1,1,2,2- $\text{C}_2\text{D}_2\text{Cl}_4$ ).

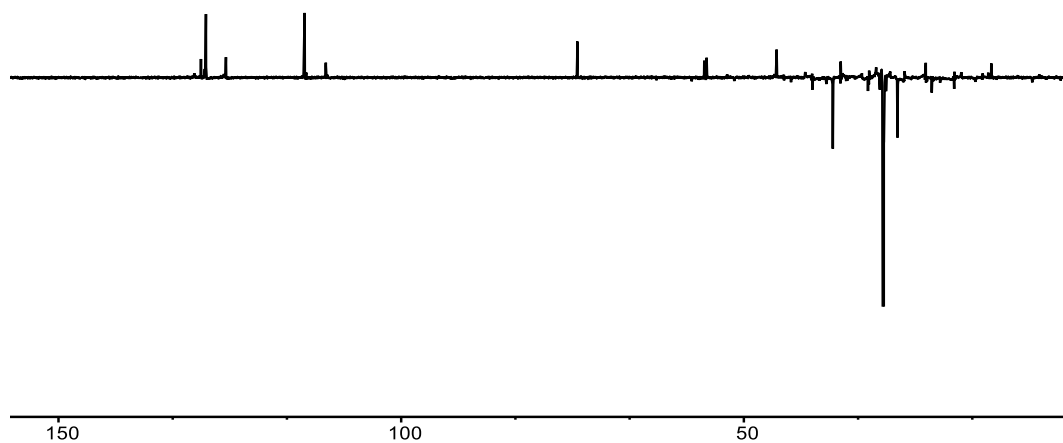

**Figure S9.** DEPT  $^{13}\text{C}$  NMR spectrum of the polymer from Table 1, Entry 1 (1,1,2,2- $\text{C}_2\text{D}_2\text{Cl}_4$ ).

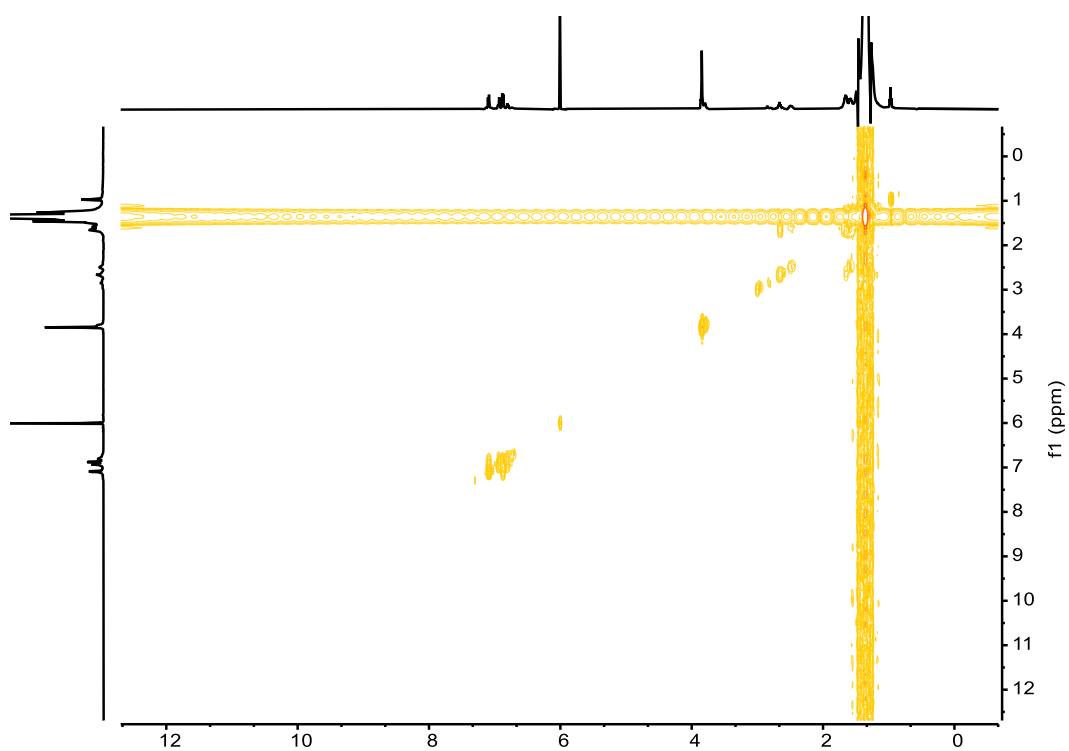

**Figure S10.**  $\text{H,H-COSY}$  spectrum of the polymer from Table 1, Entry 1 (1,1,2,2- $\text{C}_2\text{D}_2\text{Cl}_4$ ).

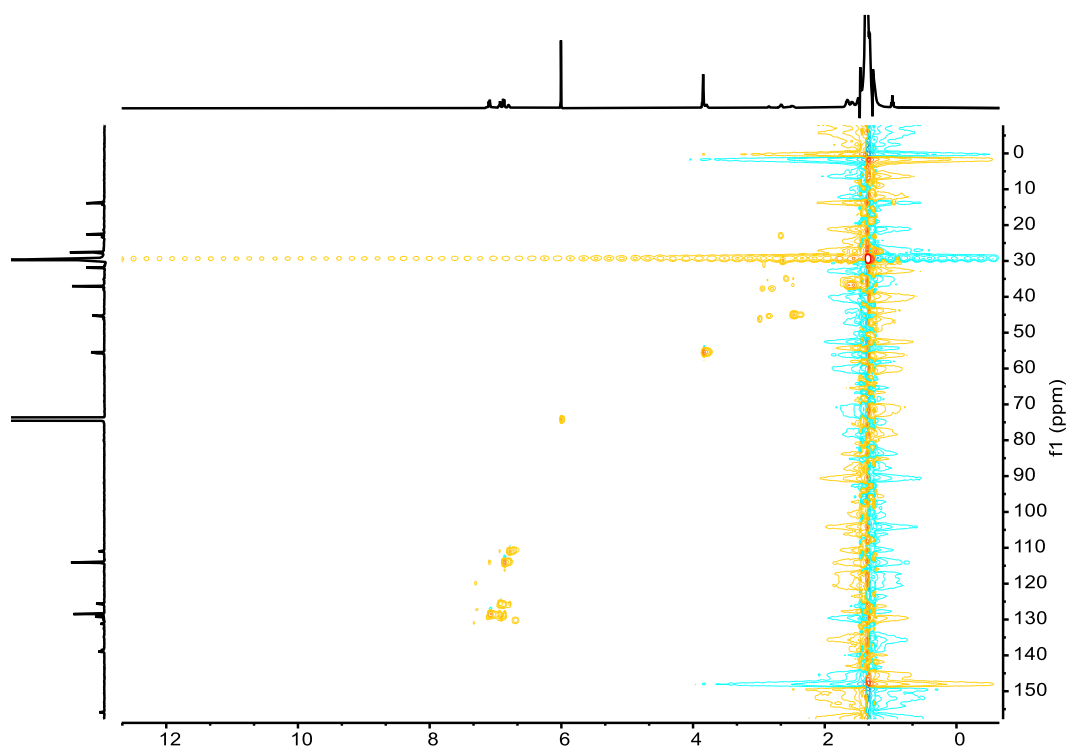

**Figure S11.** HSQC spectrum of the polymer from Table 1, Entry 1 (1,1,2,2- $C_2D_2Cl_4$ )

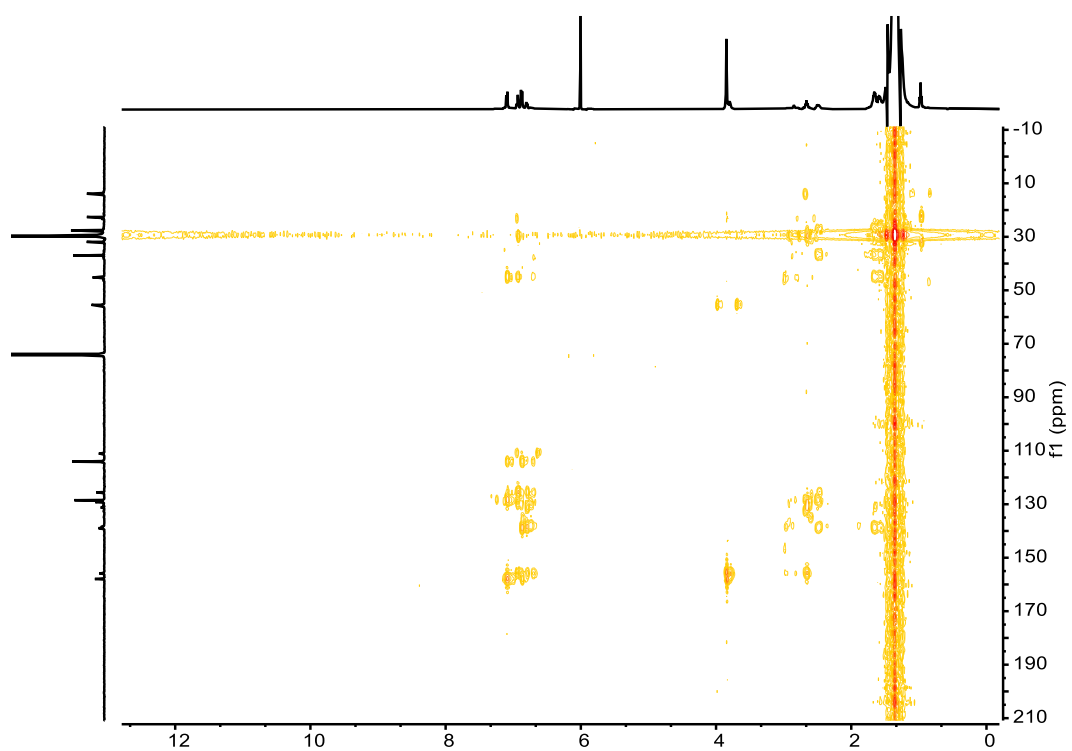

**Figure S12.** HMBC spectrum of the polymer from Table 1, Entry 1 (1,1,2,2- $C_2D_2Cl_4$ )

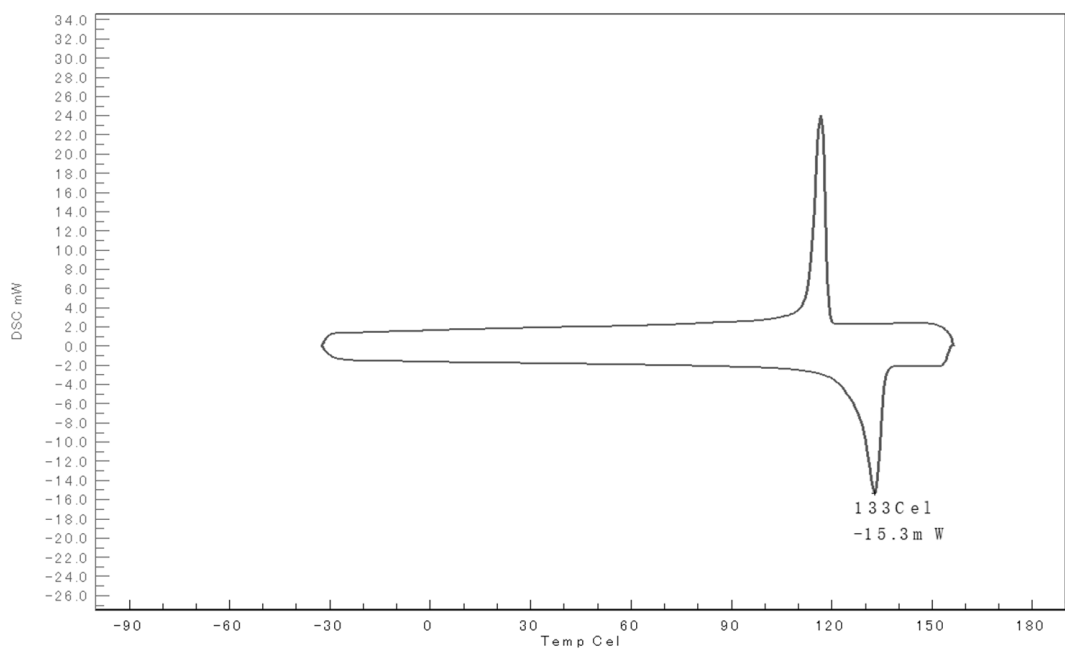

**Figure S13.** DSC curve of the polymer from Table 1, Entry 1.

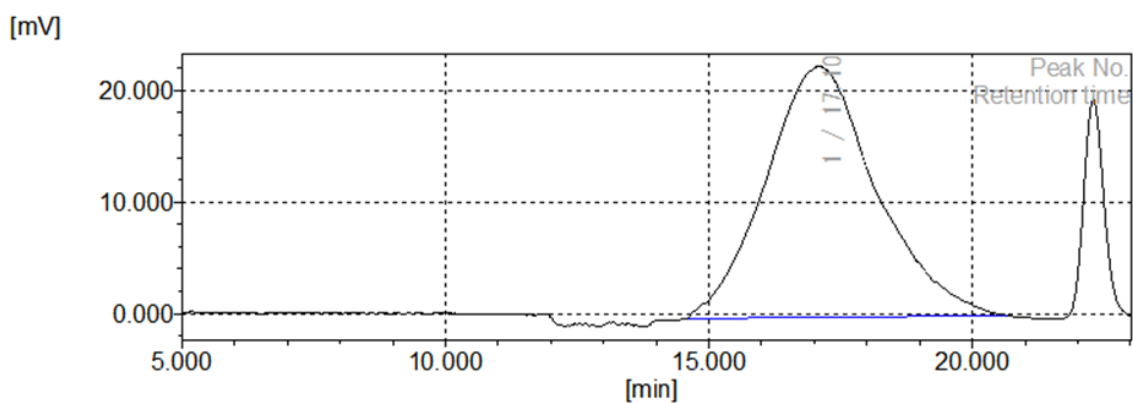

**Molecular mass calculation result (RI)**

| Total       | [min]  | [mV]   | [mol]        | Mn      | 57,265  |
|-------------|--------|--------|--------------|---------|---------|
| Peak start  | 14.618 | -0.455 | 964,047      | Mw      | 147,299 |
| Peak top    | 17.103 | 22.134 | 112,299      | Mz      | 268,352 |
| Peak end    | 20.662 | -0.175 | 2,672        | Mz+1    | 392,589 |
|             |        |        |              | Mv      | 147,299 |
| Height [mV] |        |        | 22.474       | Mp      | 123,741 |
| Area [mV*s] |        |        | 3269.804     | Mz/Mw   | 1.822   |
| Height% [%] |        |        | 100.000      | Mw/Mn   | 2.572   |
| [eta]       |        |        | 147299.08048 | Mz+1/Mw | 2.665   |

**Figure S14.** GPC trace of the polymer from Table 1, Entry 1.

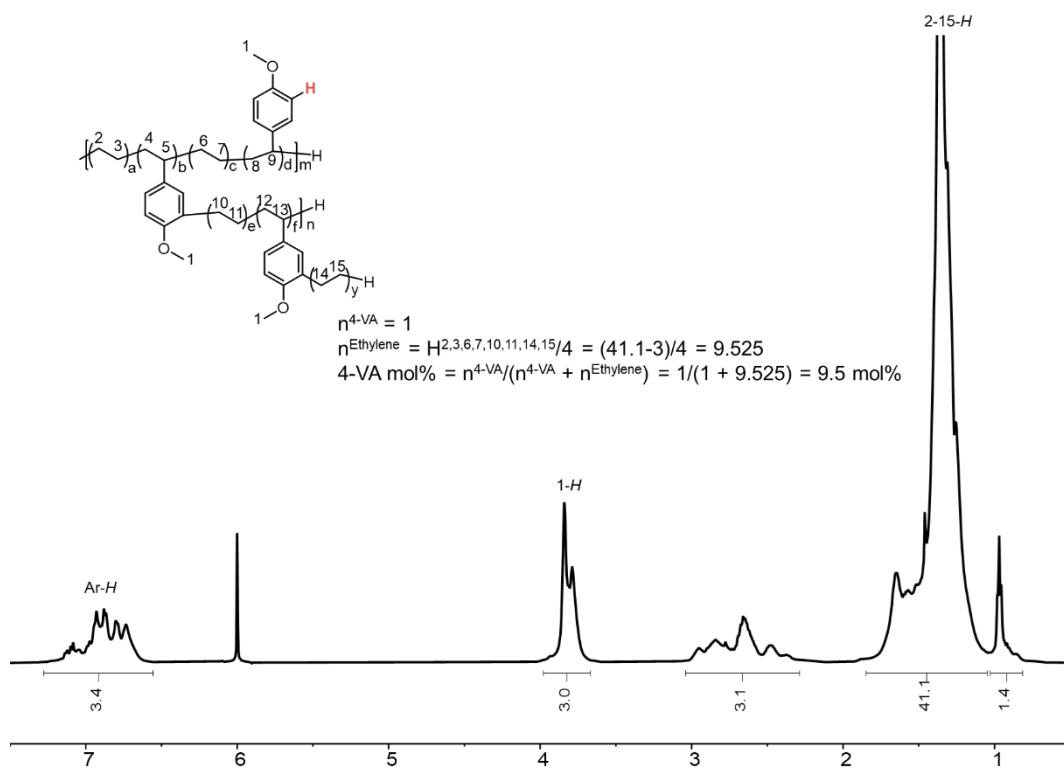

**Figure S15.**  $^1\text{H}$  NMR spectrum of the polymer from Table 1, Entry 2 (1,1,2,2-Tetrachloroethane- $d_2$ ).

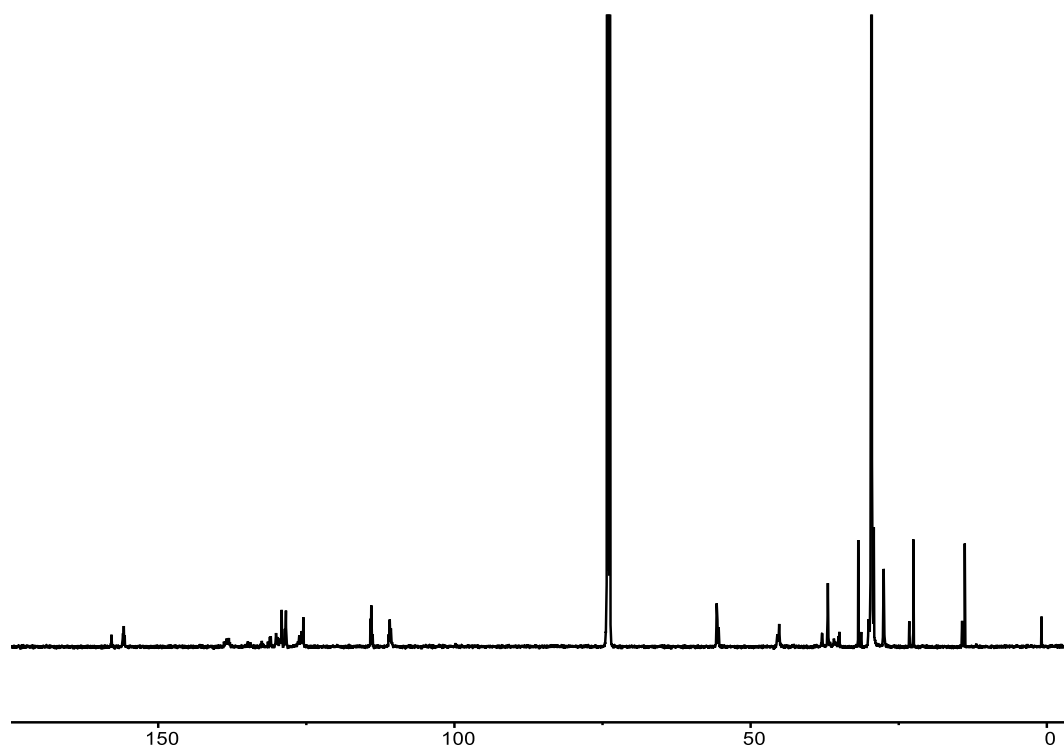

**Figure S16.**  $^{13}\text{C}$  NMR spectrum of the polymer from Table 1, Entry 2 (1,1,2,2-Tetrachloroethane- $d_2$ ).

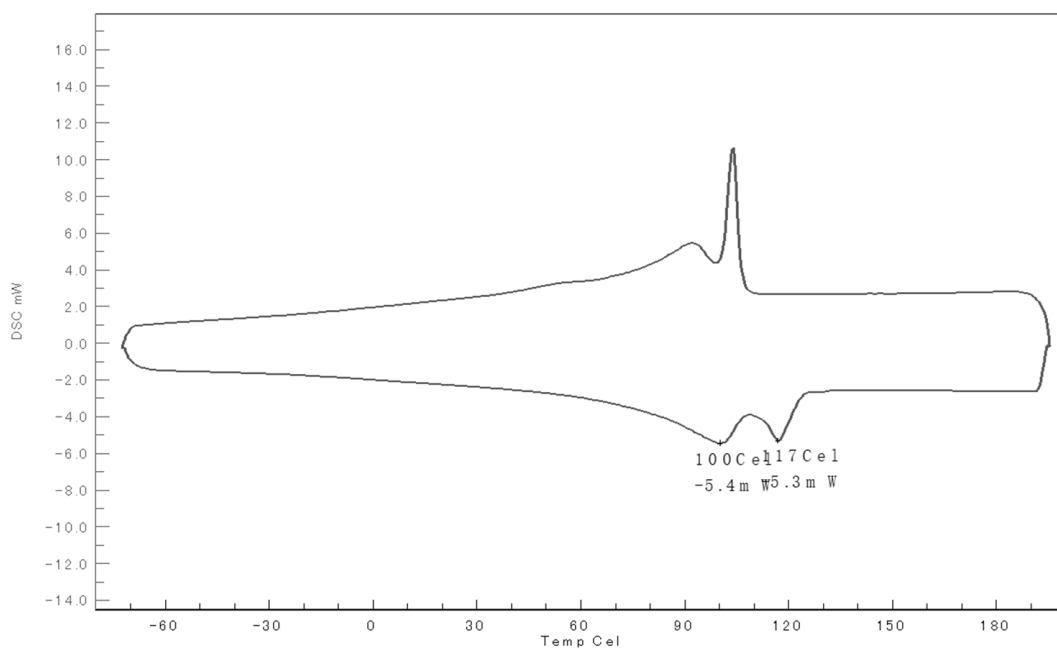

**Figure S17.** DSC curve of the polymer from Table 1, Entry 2.

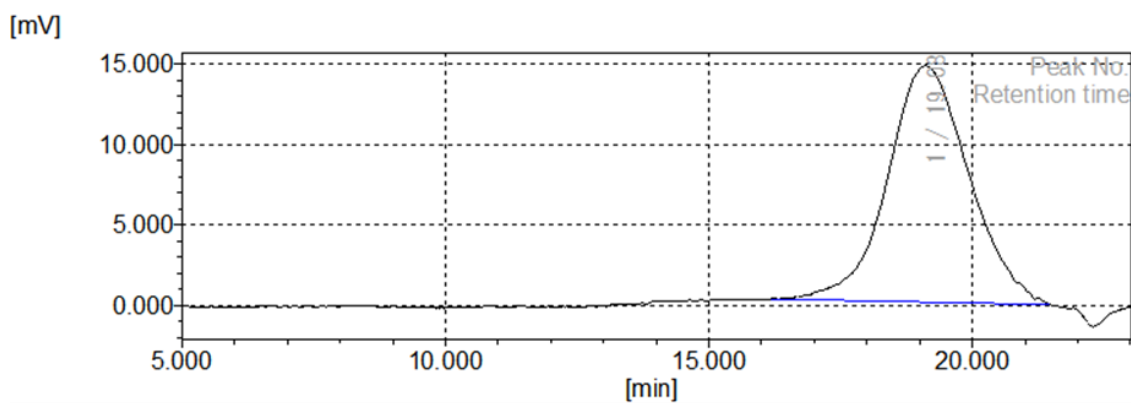

**Molecular mass calculation result (RI)**

| Total       |        |        |             |         |        |
|-------------|--------|--------|-------------|---------|--------|
|             | [min]  | [mV]   | [mol]       |         |        |
| Peak start  | 16.162 | 0.399  | 269,242     | Mn      | 10,584 |
| Peak top    | 19.082 | 14.904 | 16,092      | Mw      | 19,581 |
| Peak end    | 21.478 | 0.045  | 744         | Mz      | 37,432 |
|             |        |        |             | Mz+1    | 71,253 |
|             |        |        |             | Mv      | 19,581 |
| Height [mV] |        |        | 14.699      | Mp      | 15,539 |
| Area [mV*s] |        |        | 1580.225    | Mz/Mw   | 1.912  |
| Height% [%] |        |        | 100.000     | Mw/Mn   | 1.850  |
| [eta]       |        |        | 19581.34009 | Mz+1/Mw | 3.639  |

**Figure S18.** GPC trace of the polymer from Table 1, Entry 2.

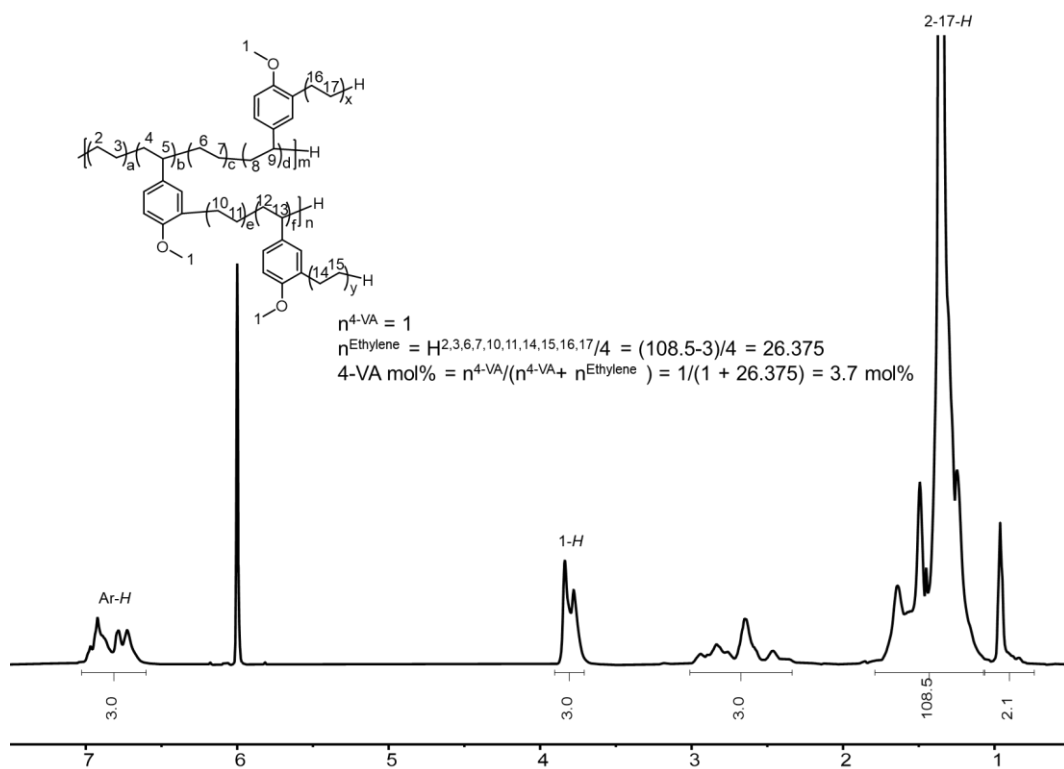

**Figure S19.**  $^1\text{H}$  NMR spectrum of the polymer from Table 1, Entry 3 (1,1,2,2-Tetrachloroethane- $d_2$ ).

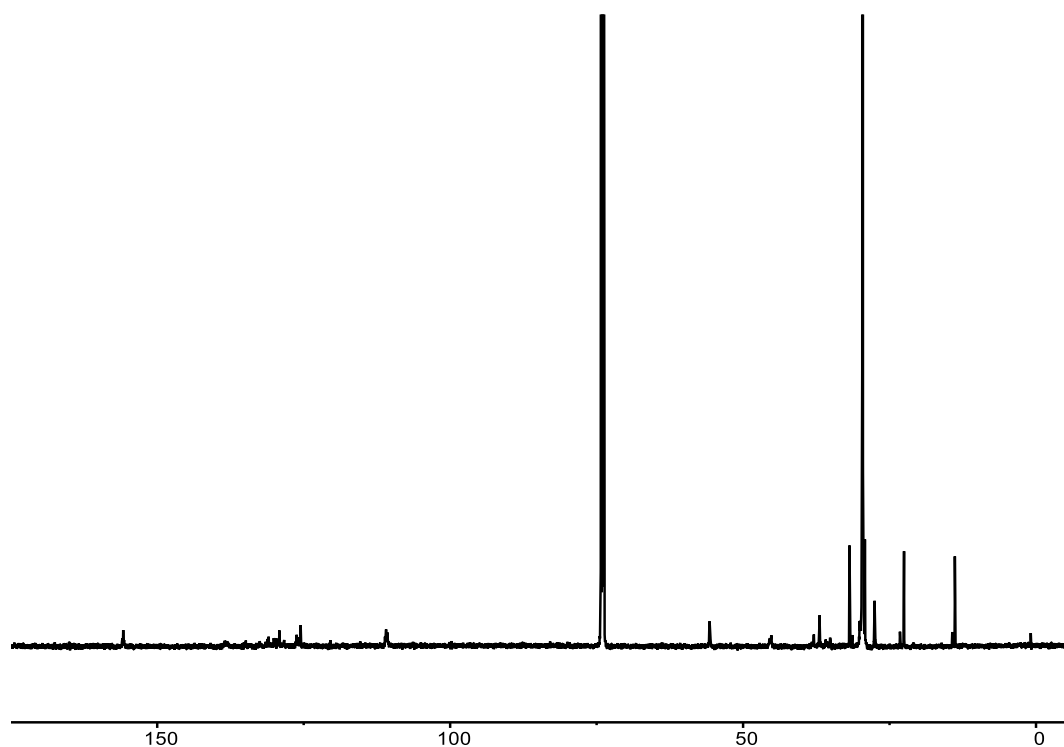

**Figure S20.**  $^{13}\text{C}$  NMR spectrum of the polymer from Table 1, Entry 3 (1,1,2,2-Tetrachloroethane- $d_2$ ).

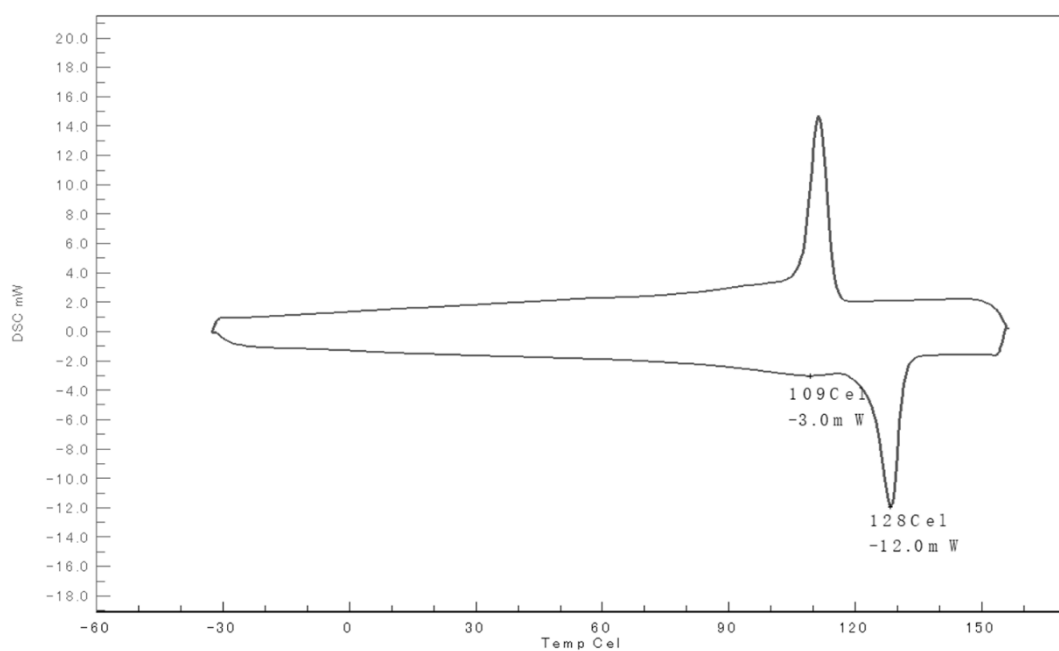

**Figure S21.** DSC curve of the polymer from Table 1, Entry 3.

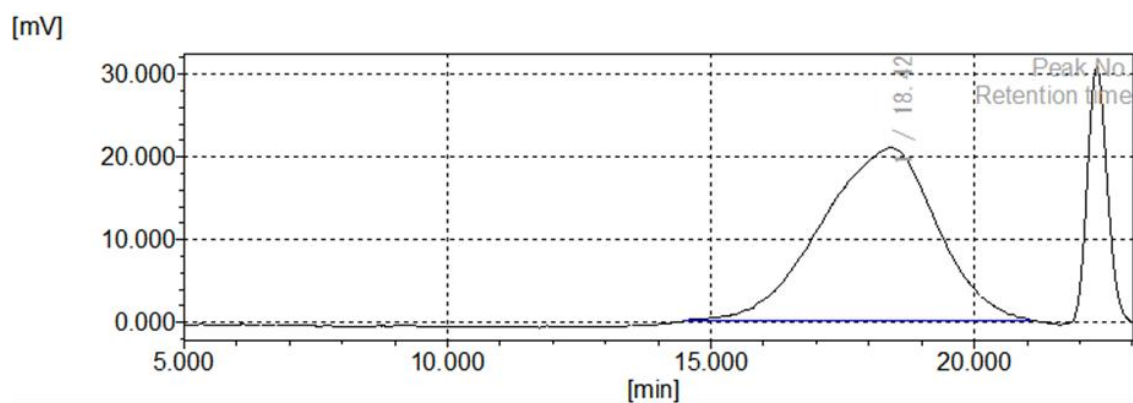

**Molecular mass calculation result (RI)**

Total

|             | [min]  | [mV]   | [mol]       | Mn      | 25,159  |
|-------------|--------|--------|-------------|---------|---------|
| Peak start  | 14.485 | 0.167  | 1,109,363   | Mw      | 68,650  |
| Peak top    | 18.427 | 21.117 | 31,121      | Mz      | 176,869 |
| Peak end    | 21.103 | 0.223  | 1,535       | Mz+1    | 356,521 |
|             |        |        |             | Mv      | 68,650  |
| Height [mV] |        |        | 20.917      | Mp      | 31,069  |
| Area [mV*s] |        |        | 3192.564    | Mz/Mw   | 2.576   |
| Height% [%] |        |        | 100.000     | Mw/Mn   | 2.729   |
| [eta]       |        |        | 68649.73877 | Mz+1/Mw | 5.193   |

**Figure S22.** GPC trace of the polymer from Table 1, Entry 3.

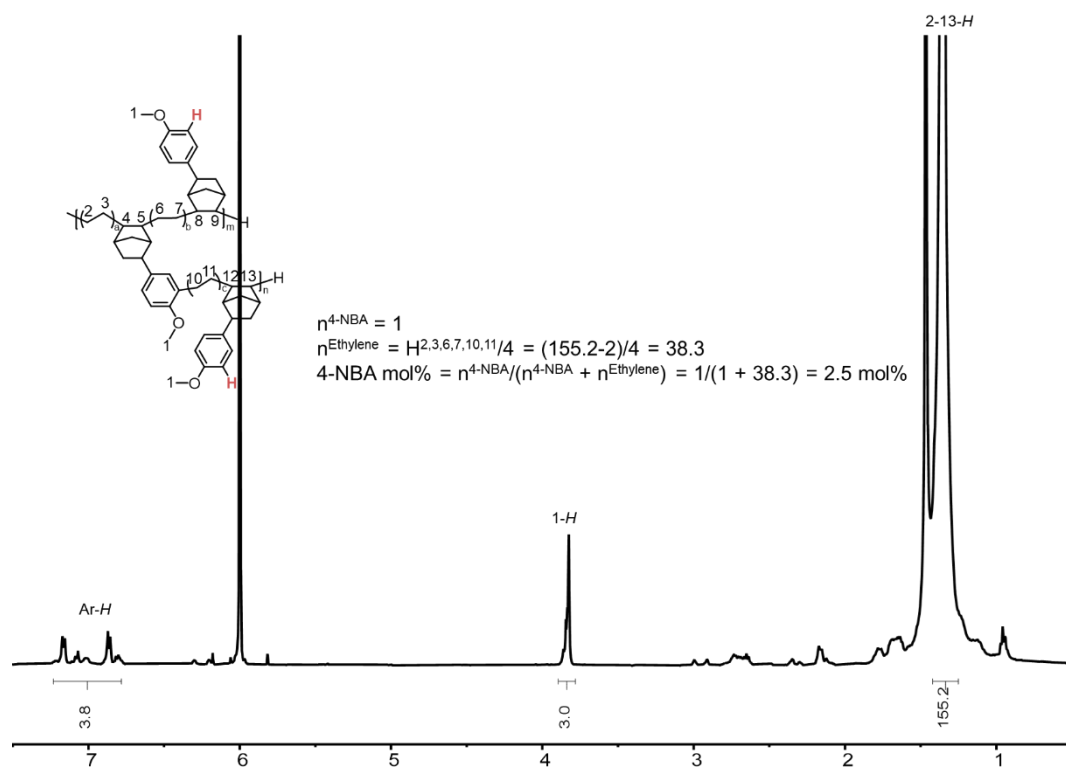

**Figure S23.**  $^1\text{H}$  NMR spectrum of the polymer from Table 1, Entry 4 (1,1,2,2-Tetrachloroethane- $d_2$ ).

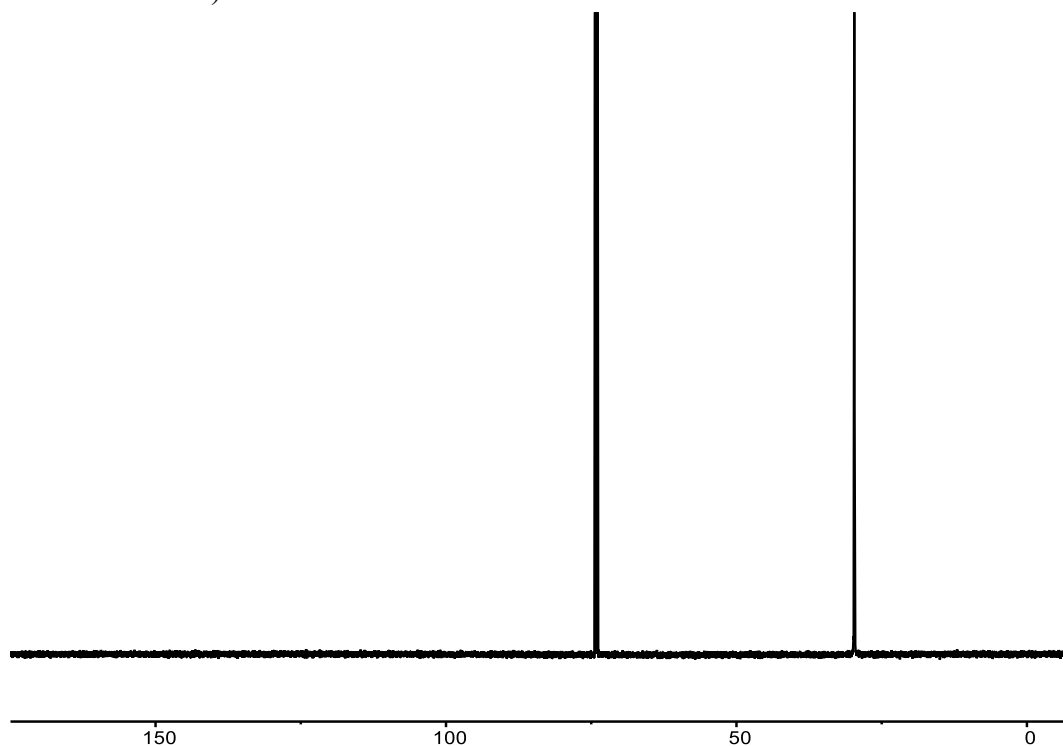

**Figure S24.**  $^{13}\text{C}$  NMR spectrum of the polymer from Table 1, Entry 4 (1,1,2,2-Tetrachloroethane- $d_2$ ).

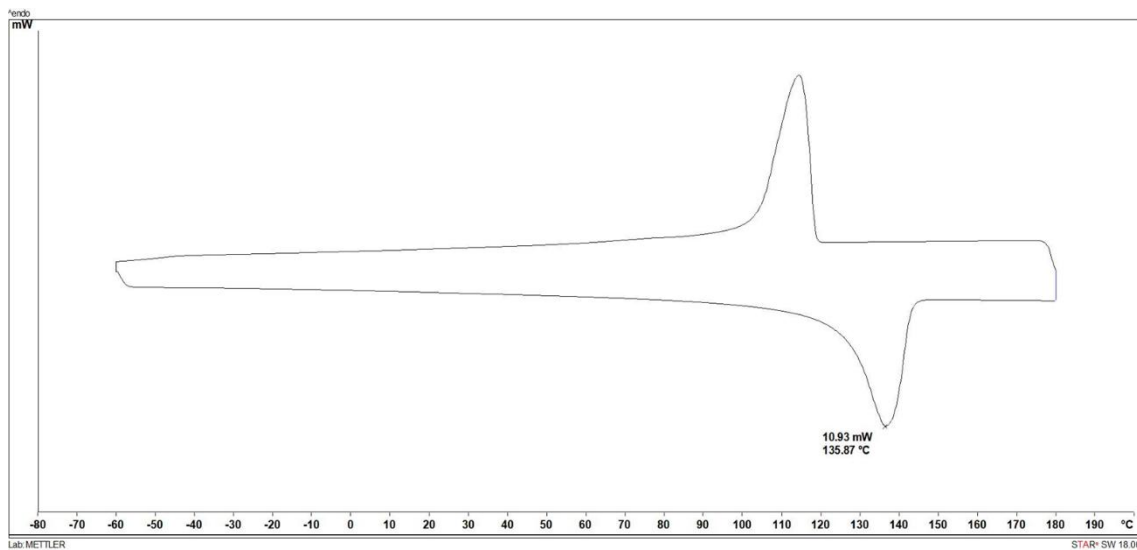

**Figure S25.** DSC curve of the polymer from Table 1, Entry 4.

**MW Averages**

Mp: 799552

Mn: 271199

Mv: 780140

Mw: 884173

Mz: 1796531

Mz+1: 3003113

PD: 3.2602

**Distribution Plots**

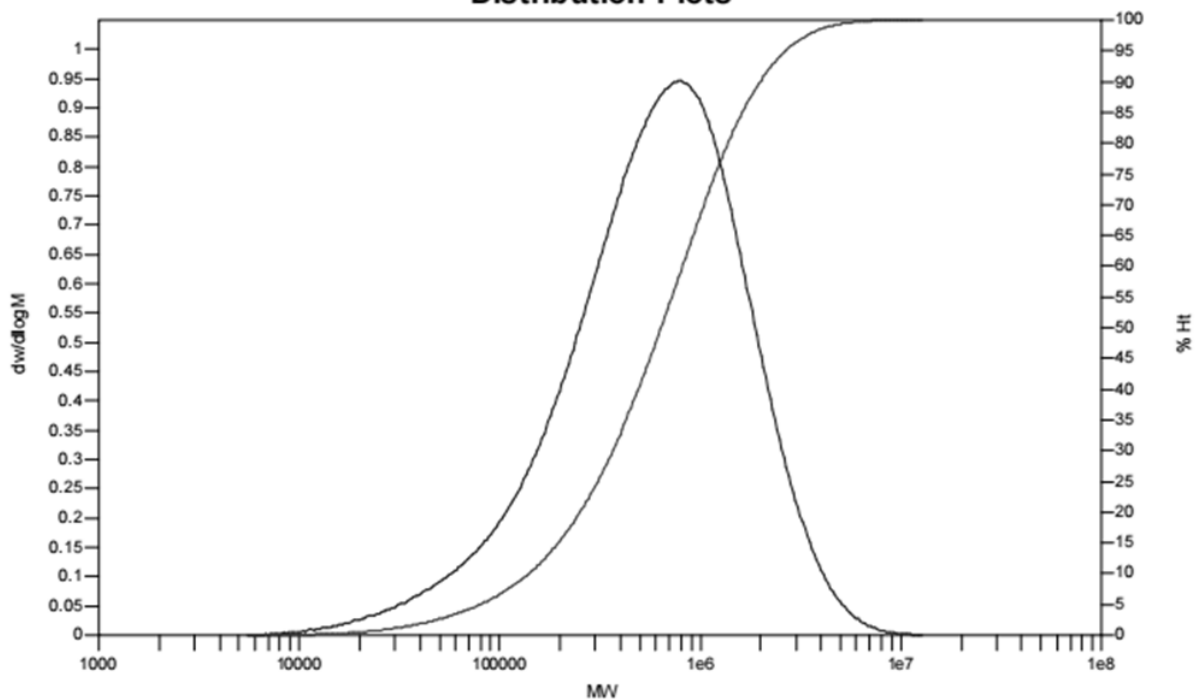

**Figure S26.** GPC trace of the polymer from Table 1, Entry 4.

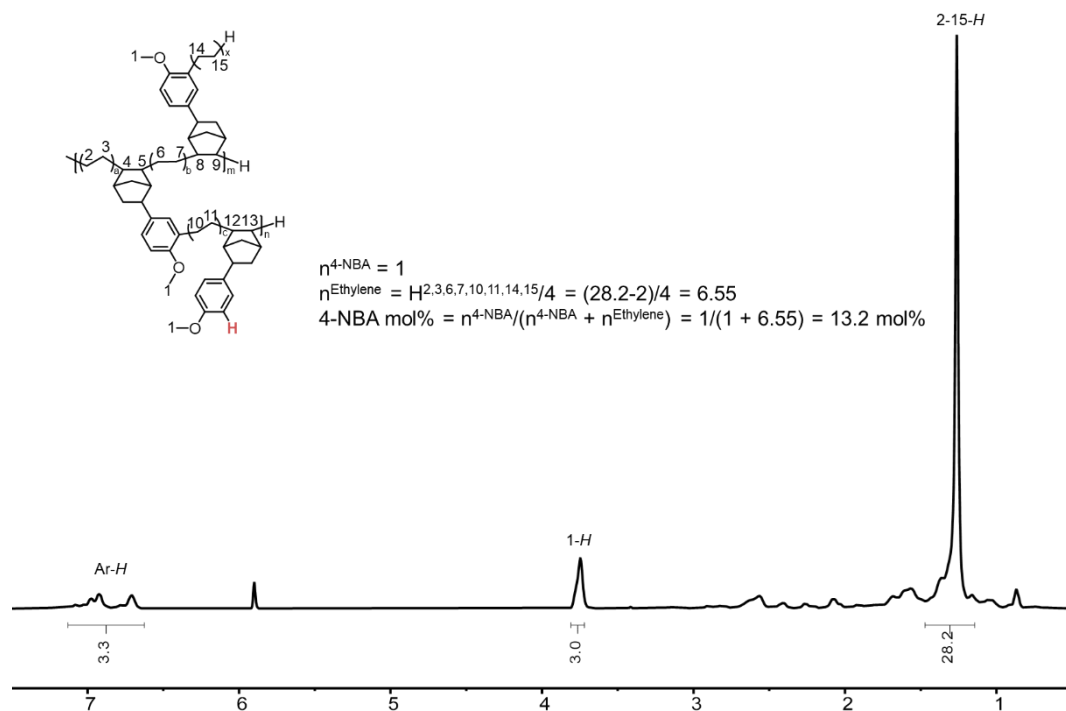

**Figure S27.**  $^1\text{H}$  NMR spectrum of the polymer from Table 1, Entry 5 (1,1,2,2-Tetrachloroethane- $d_2$ ).

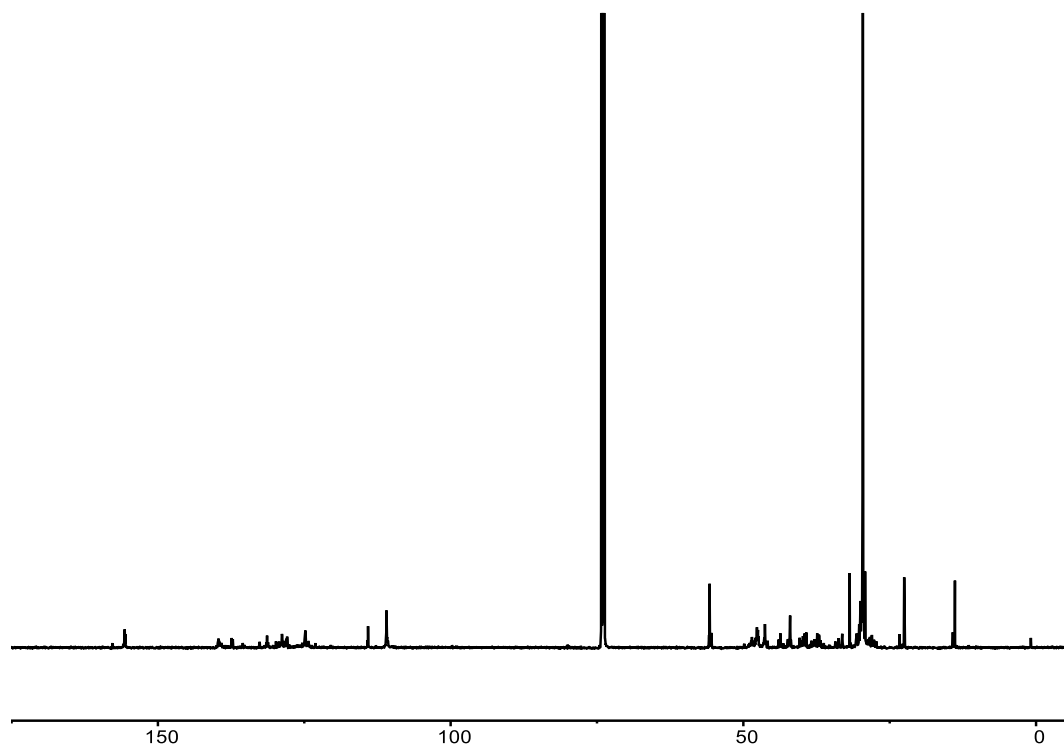

**Figure S28.**  $^{13}\text{C}$  NMR spectrum of the polymer from Table 1, Entry 5 (1,1,2,2-Tetrachloroethane- $d_2$ ).

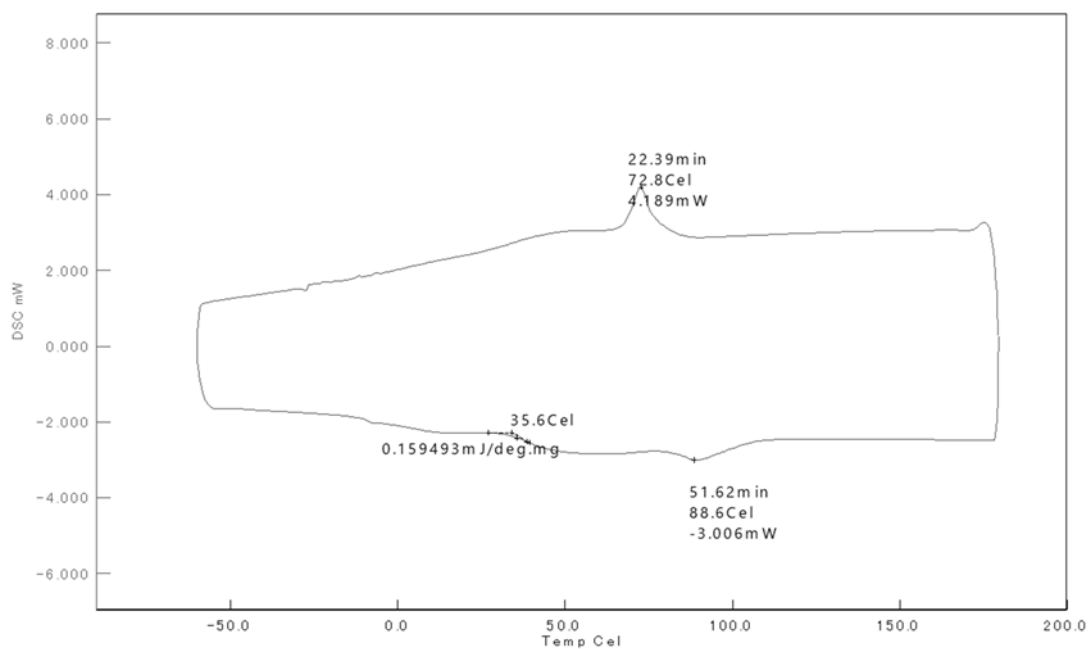

**Figure S29.** DSC curve of the polymer from Table 1, Entry 5.

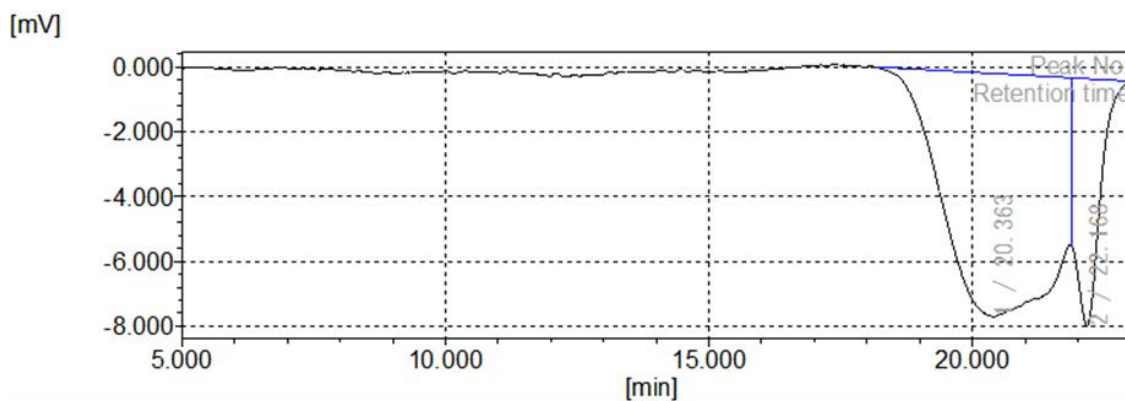

**Molecular mass calculation result (RI)**

Peak 1 Base Peak

|             | [min]  | [mV]   | [mol]      |         |        |
|-------------|--------|--------|------------|---------|--------|
| Peak start  | 18.150 | 0.013  | 32,284     | Mn      | 1,027  |
| Peak top    | 20.363 | -7.703 | 3,156      | Mw      | 3,571  |
| Peak end    | 21.872 | -5.505 | 138        | Mz      | 7,047  |
|             |        |        |            | Mz+1    | 10,236 |
|             |        |        |            | Mv      | 3,571  |
| Height [mV] |        |        | 7.513      | Mp      | 4,413  |
| Area [mV*s] |        |        | 1061.149   | Mz/Mw   | 1.974  |
| Height% [%] |        |        | 49.622     | Mw/Mn   | 3.476  |
| [eta]       |        |        | 3570.61295 | Mz+1/Mw | 2.867  |

**Figure S30.** GPC trace of the polymer from Table 1, Entry 5.

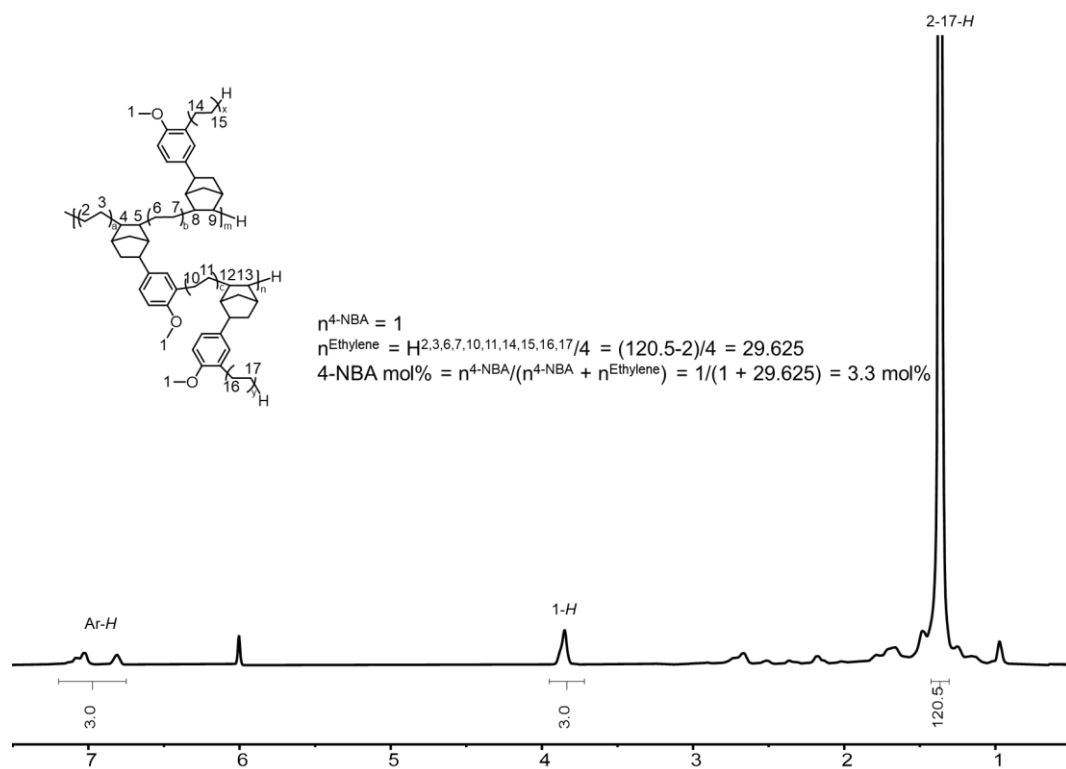

**Figure S31.**  $^1\text{H}$  NMR spectrum of the polymer from Table 1, Entry 6 (1,1,2,2-Tetrachloroethane- $d_2$ ).

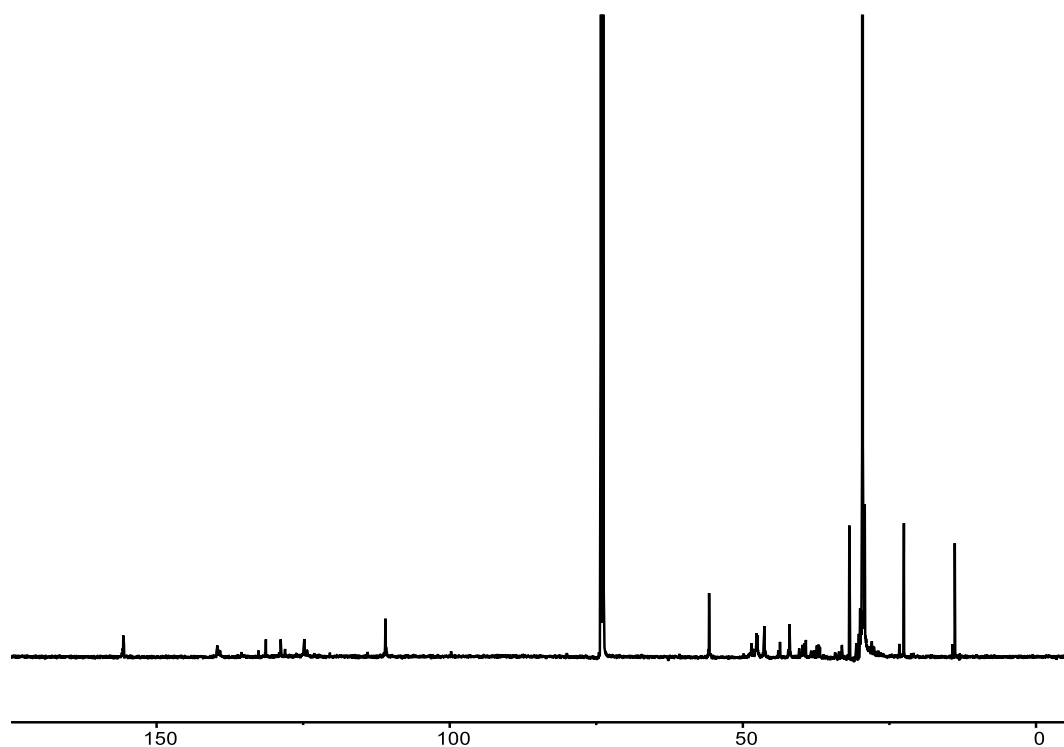

**Figure S32.**  $^{13}\text{C}$  NMR spectrum of the polymer from Table 1, Entry 6 (1,1,2,2-Tetrachloroethane- $d_2$ ).

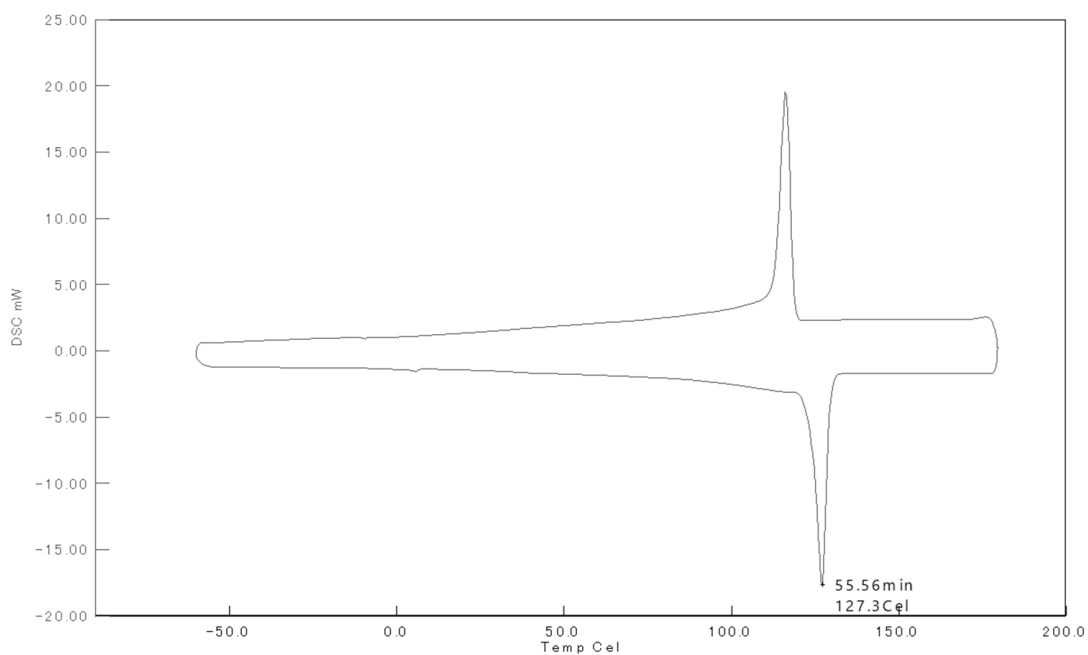

**Figure S33.** DSC curve of the polymer from Table 1, Entry 6.

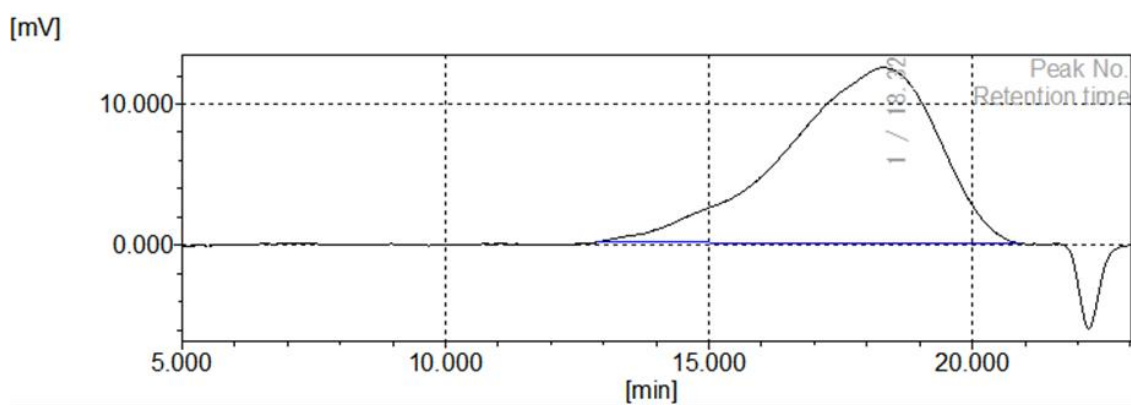

**Molecular mass calculation result (RI)**

| Total       |        | [min]  | [mV]         | [mol]   |           |  |
|-------------|--------|--------|--------------|---------|-----------|--|
| Peak start  | 12.880 | 0.216  | 8,604,028    | Mn      | 23,833    |  |
| Peak top    | 18.322 | 12.583 | 27,090       | Mw      | 135,830   |  |
| Peak end    | 20.905 | 0.114  | 1,463        | Mz      | 918,722   |  |
|             |        |        |              | Mz+1    | 2,739,614 |  |
|             |        |        |              | Mv      | 135,830   |  |
| Height [mV] |        |        | 12.436       | Mp      | 28,511    |  |
| Area [mV*s] |        |        | 2516.226     | Mz/Mw   | 6.764     |  |
| Height% [%] |        |        | 100.000      | Mw/Mn   | 5.699     |  |
| [eta]       |        |        | 135830.22712 | Mz+1/Mw | 20.169    |  |

**Figure S34.** GPC trace of the polymer from Table 1, Entry 6.

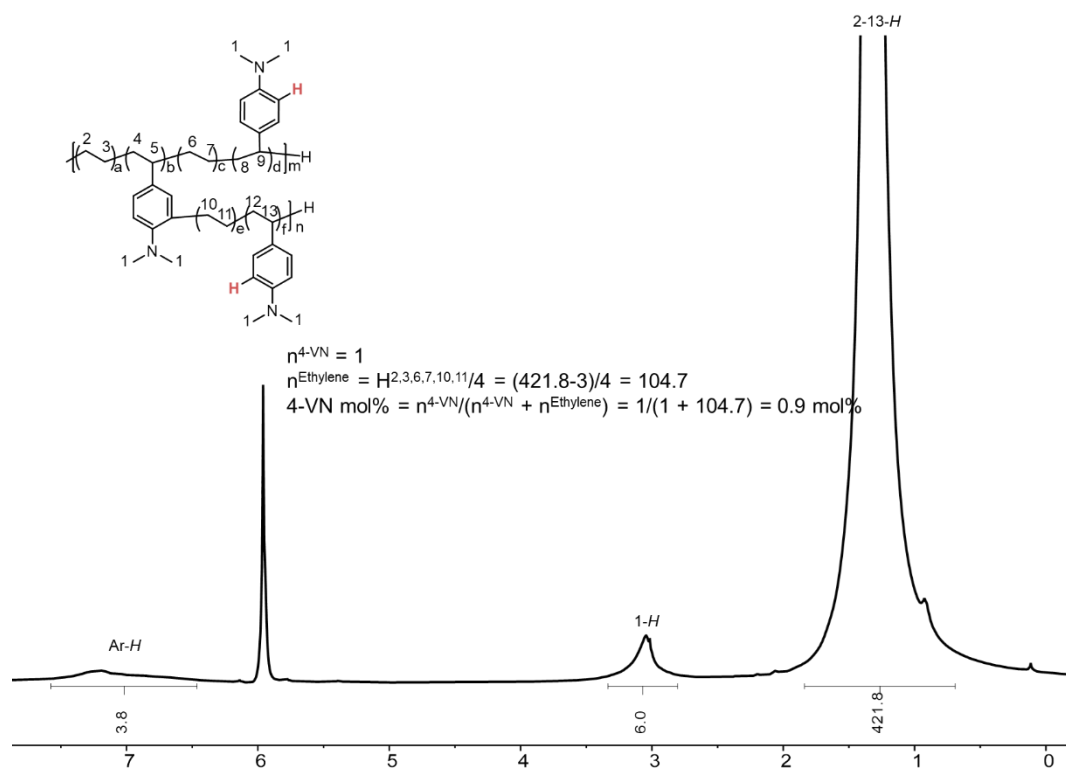

**Figure S35.**  $^1\text{H}$  NMR spectrum of the polymer from Table 1, Entry 7 (1,1,2,2-Tetrachloroethane- $d_2$ ).

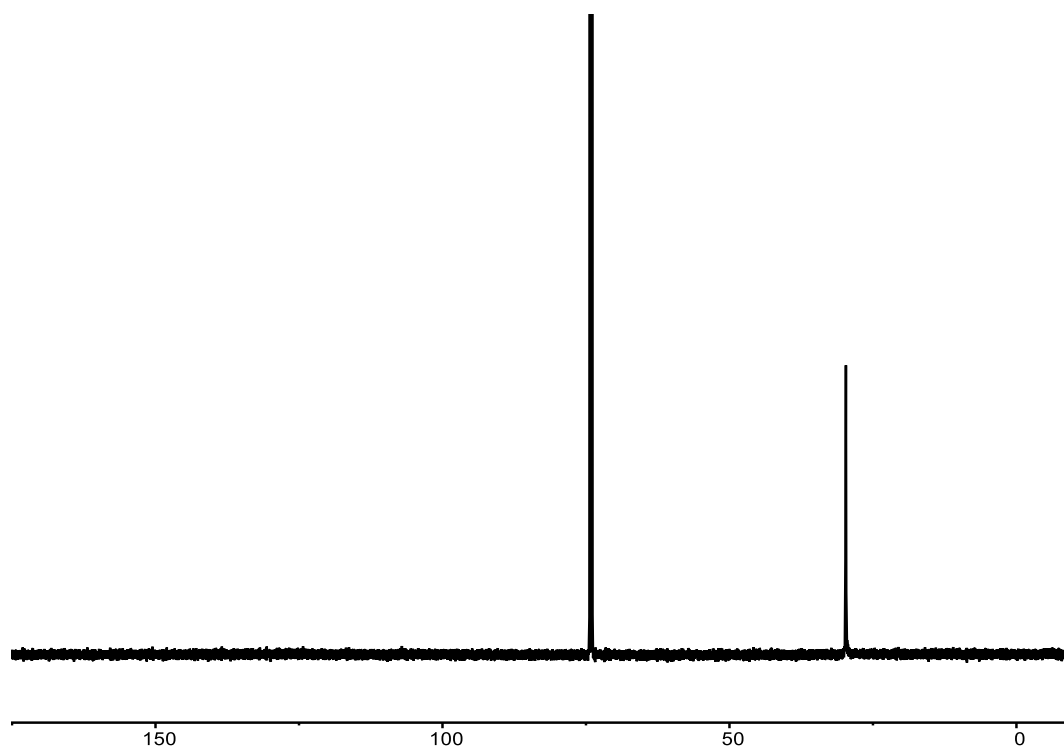

**Figure S36.**  $^{13}\text{C}$  NMR spectrum of the polymer from Table 1, Entry 7 (1,1,2,2-Tetrachloroethane- $d_2$ ).

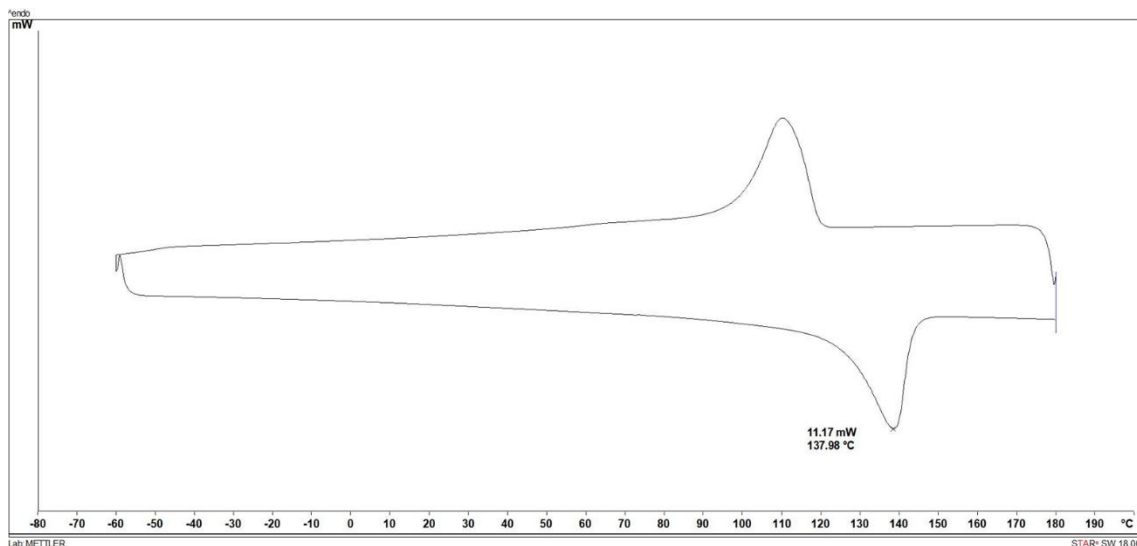

**Figure S37.** DSC curve of the polymer from Table 1, Entry 7.

**MW Averages**

Mp: 960106

Mn: 466286

Mv: 1160664

Mw: 1346492

Mz: 3327095

Mz+1: 6364862

PD: 2.8877

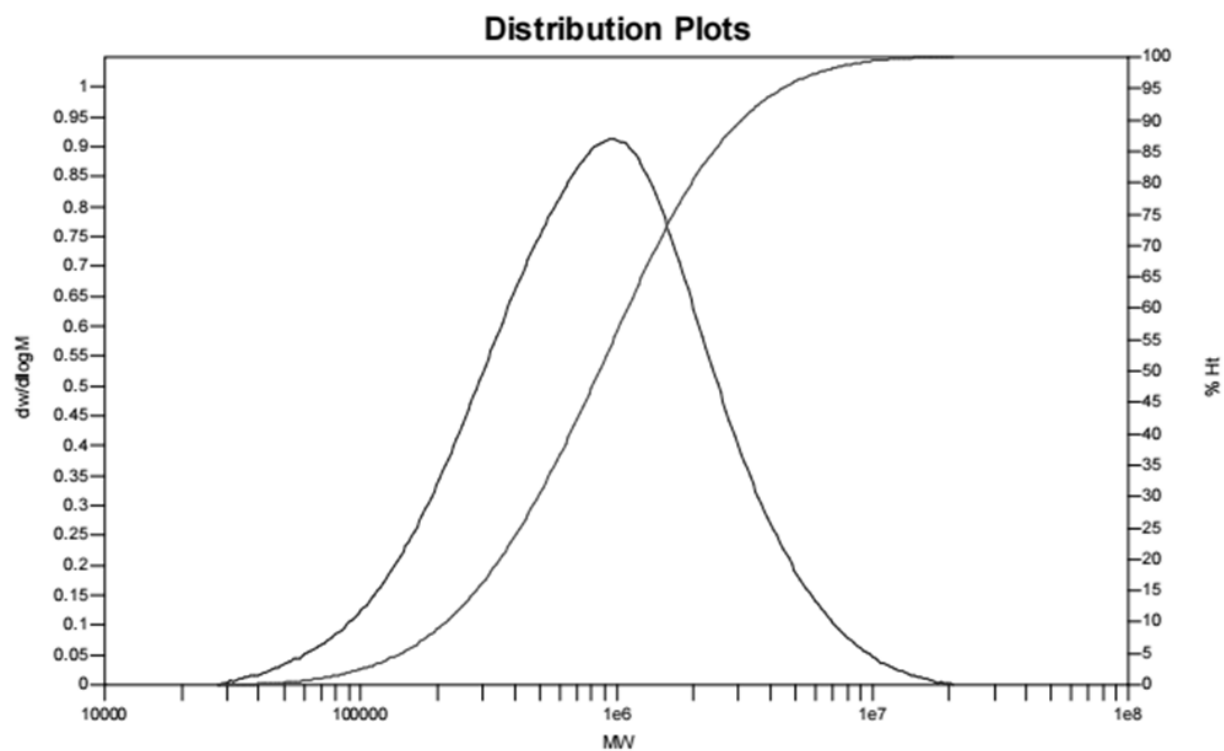

**Figure S38.** GPC trace of the polymer from Table 1, Entry 7.

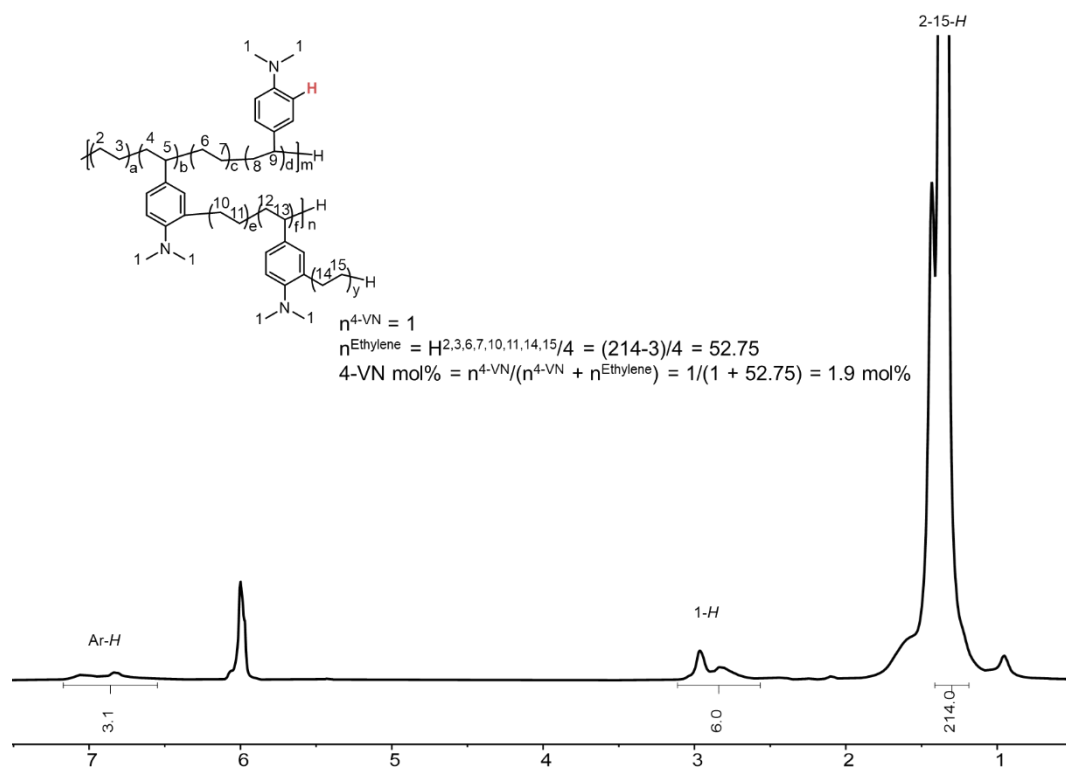

**Figure S39.**  $^1\text{H}$  NMR spectrum of the polymer from Table 1, Entry 8 (1,1,2,2-Tetrachloroethane- $d_2$ ).

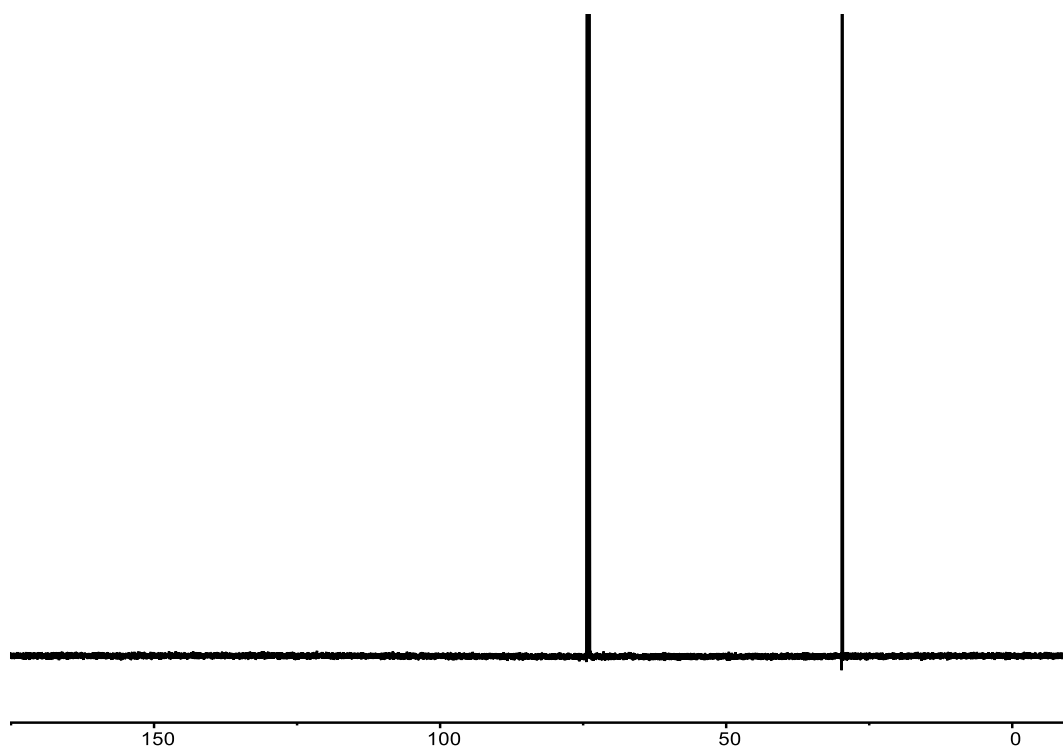

**Figure S40.**  $^{13}\text{C}$  NMR spectrum of the polymer from Table 1, Entry 8 (1,1,2,2-Tetrachloroethane- $d_2$ ).

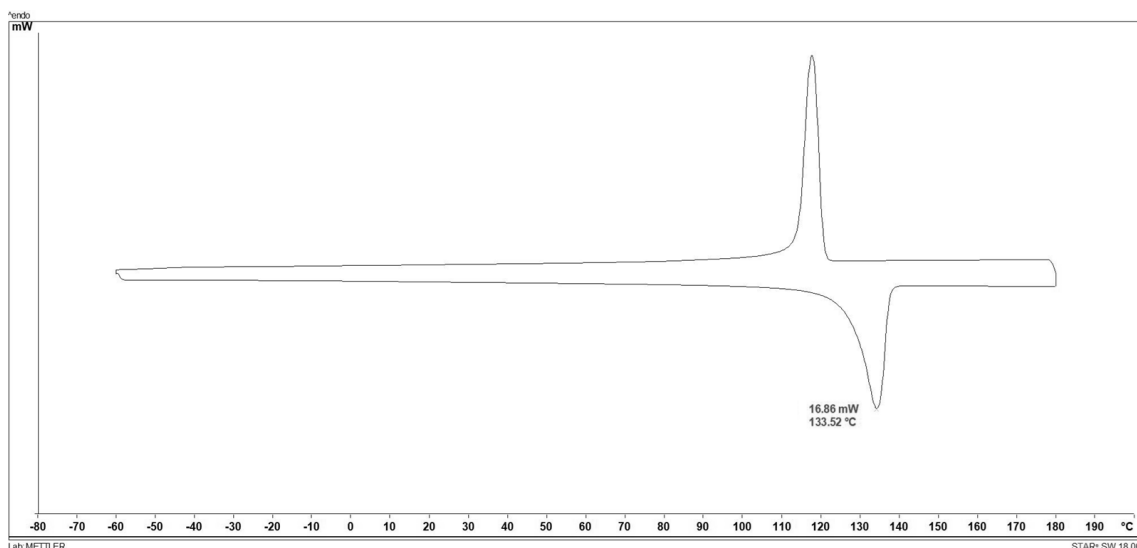

**Figure S41.** DSC curve of the polymer from Table 1, Entry 8.

**MW Averages**

|            |               |            |            |
|------------|---------------|------------|------------|
| Mp: 150003 | Mn: 85590     | Mv: 237385 | Mw: 285966 |
| Mz: 850312 | Mz+1: 1627128 | PD: 3.3411 |            |

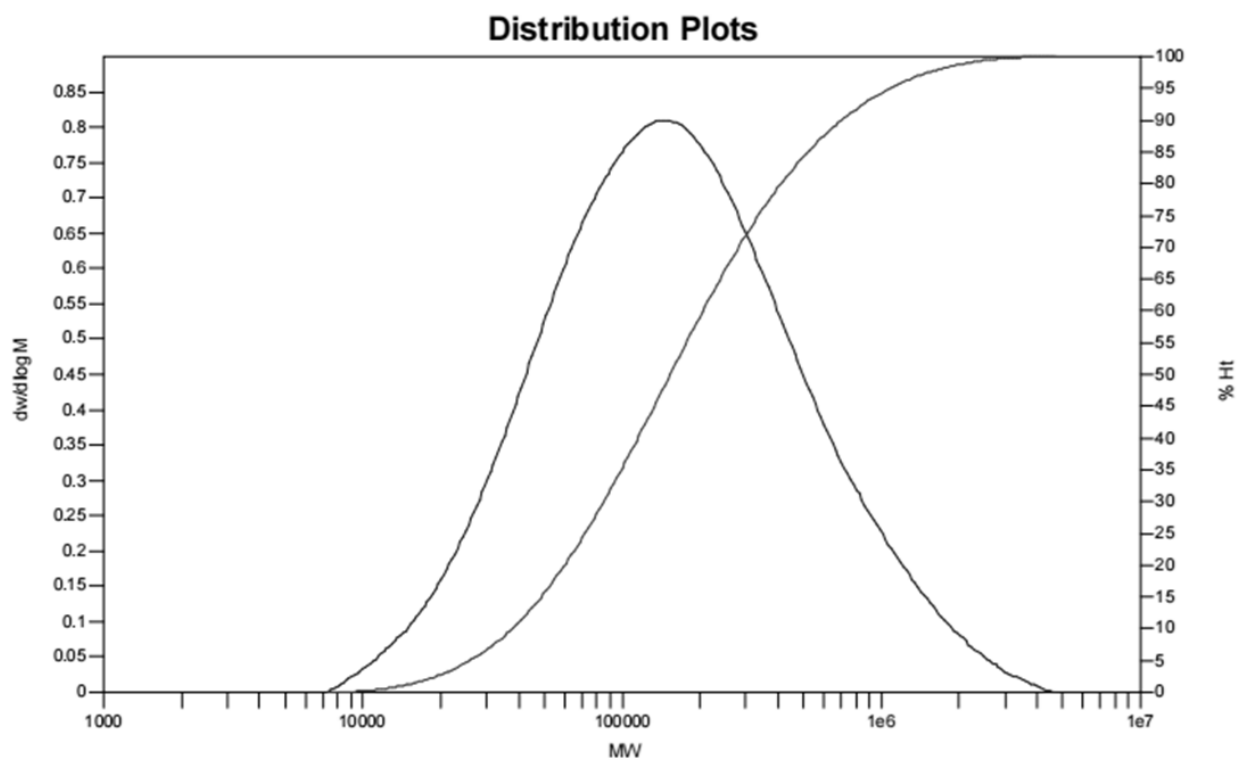

**Figure S42.** GPC trace of the polymer from Table 1, Entry 8.

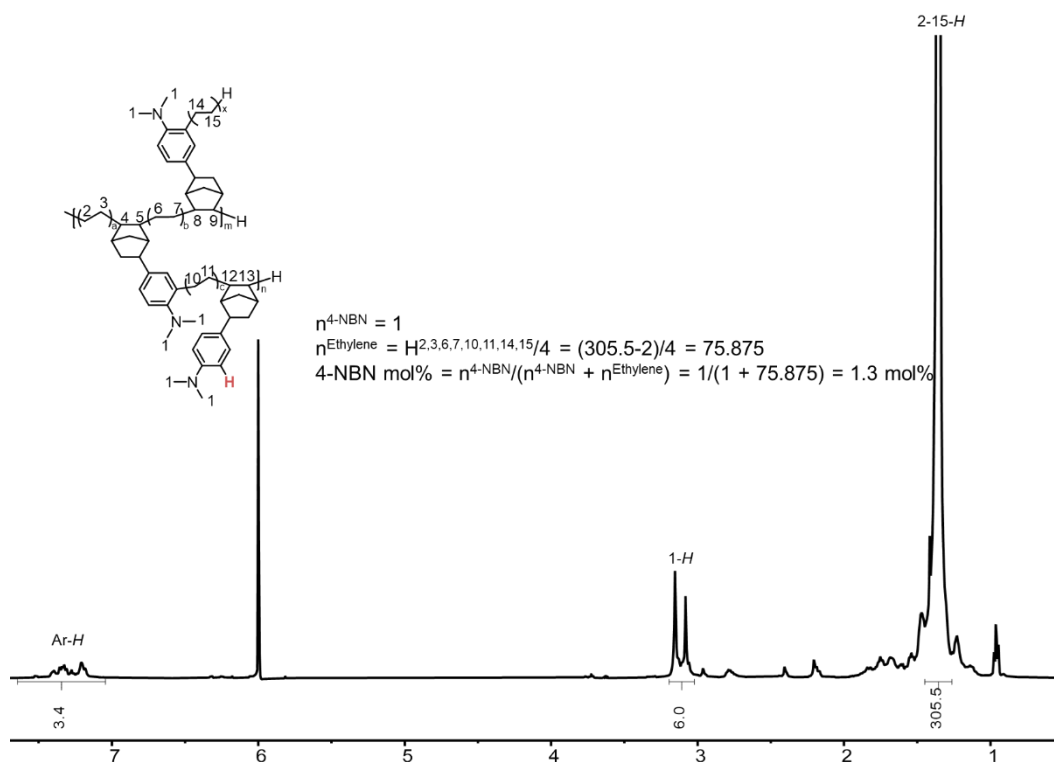

**Figure S43.**  $^1\text{H}$  NMR spectrum of the polymer from Table 1, Entry 9 (1,1,2,2-Tetrachloroethane- $d_2$ ).

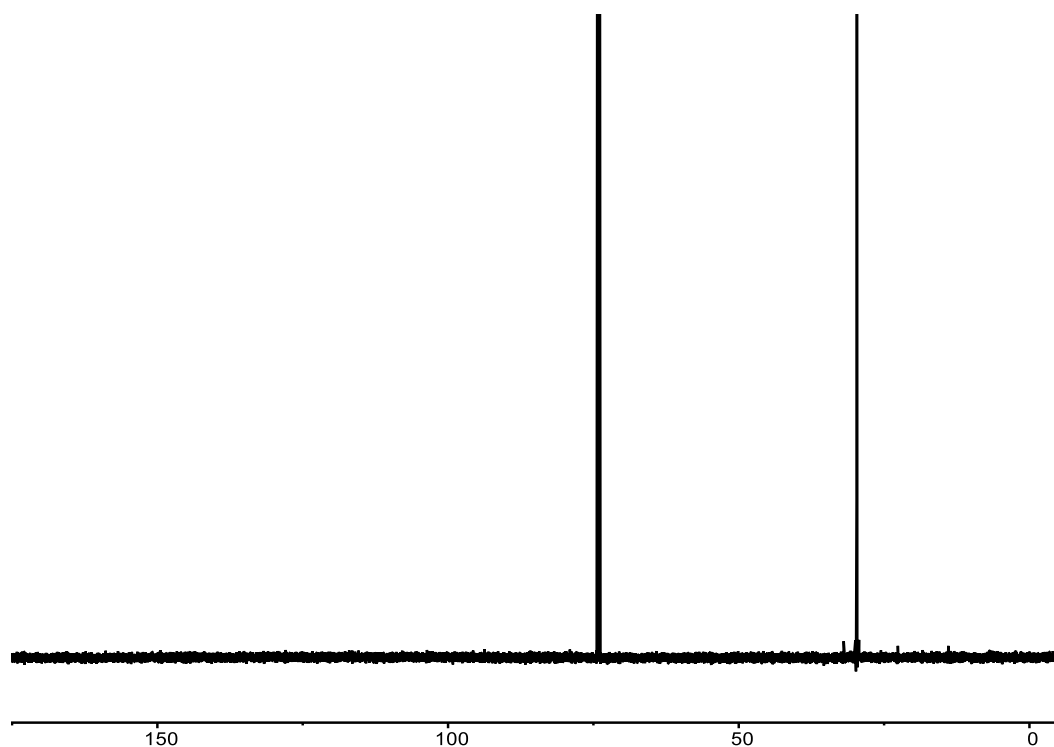

**Figure S44.**  $^{13}\text{C}$  NMR spectrum of the polymer from Table 1, Entry 9 (1,1,2,2-Tetrachloroethane- $d_2$ ).

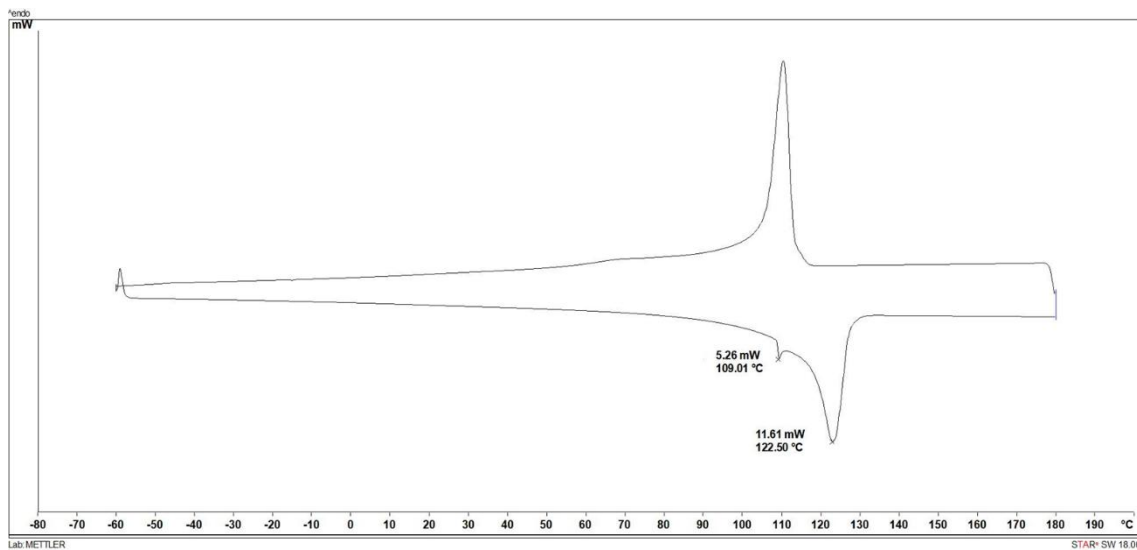

**Figure S45.** DSC curve of the polymer from Table 1, Entry 9.

**MW Averages**

Mp: 49731

Mn: 16256

Mv: 51318

Mw: 59414

Mz: 132148

Mz+1: 225477

PD: 3.6549

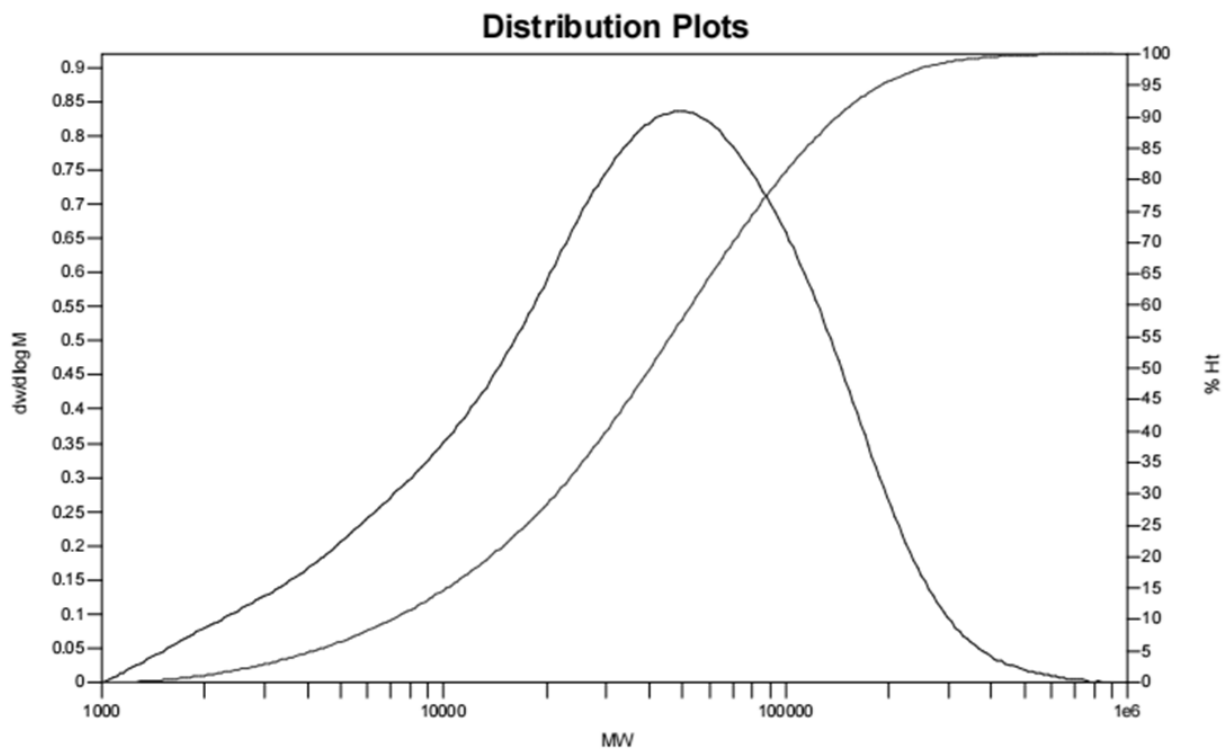

**Figure S46.** GPC trace of the polymer from Table 1, Entry 9.

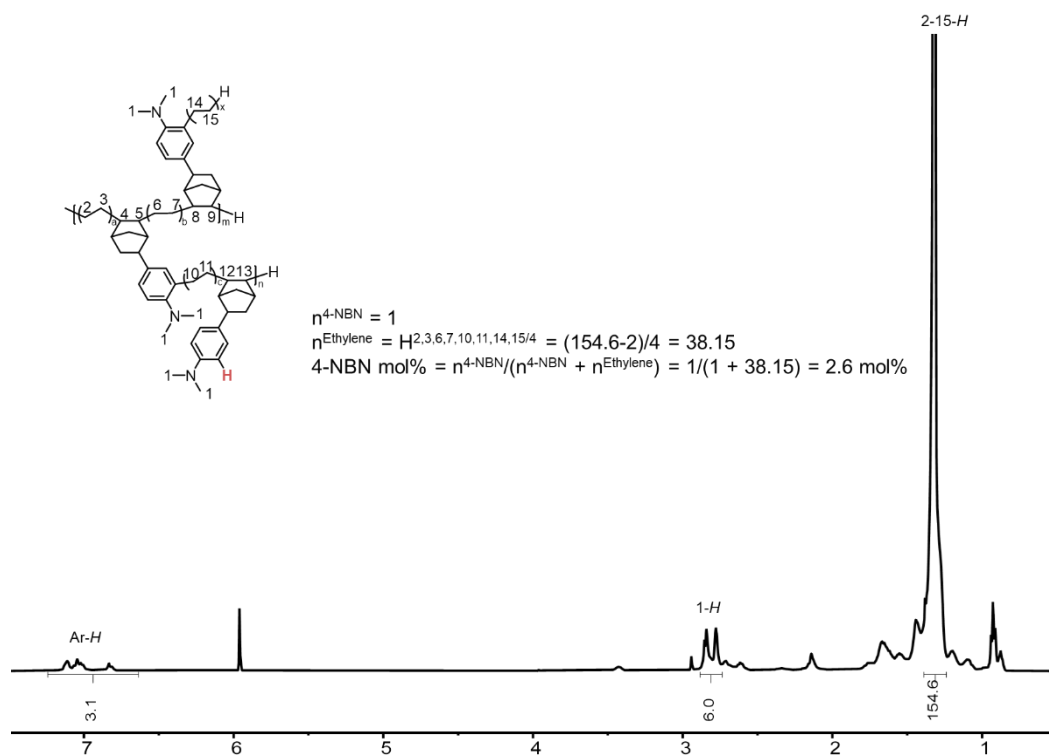

**Figure S47.**  $^1\text{H}$  NMR spectrum of the polymer from Table 1, Entry 10 (1,1,2,2-Tetrachloroethane- $d_2$ ).

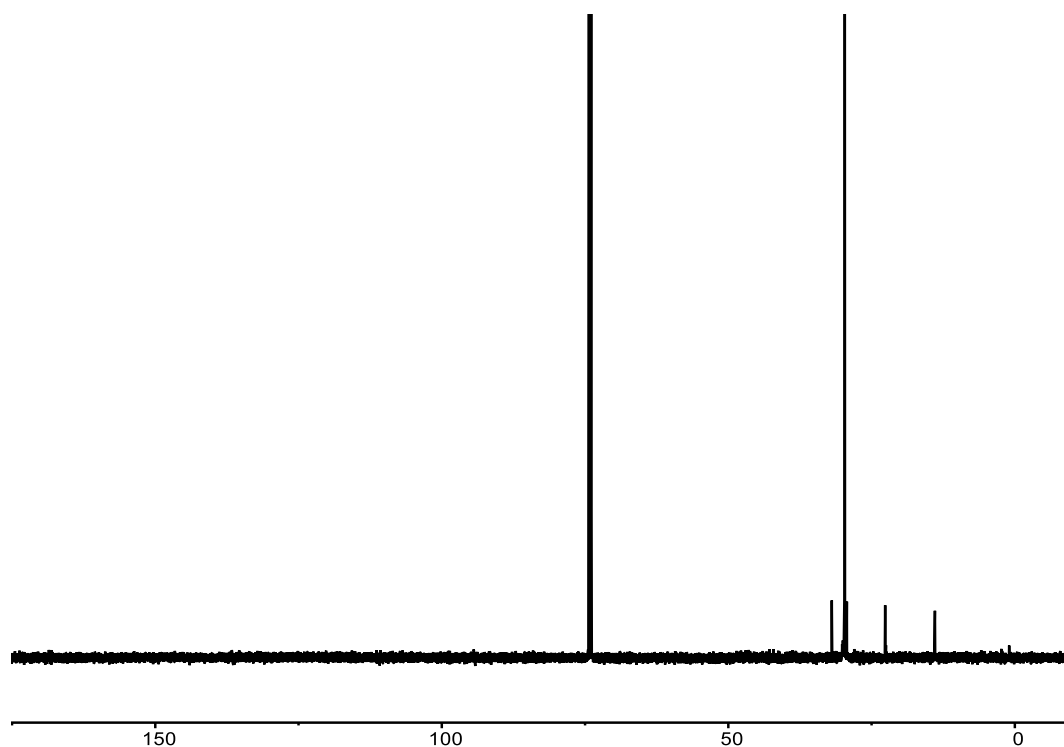

**Figure S48.**  $^{13}\text{C}$  NMR spectrum of the polymer from Table 1, Entry 10 (1,1,2,2-Tetrachloroethane- $d_2$ ).

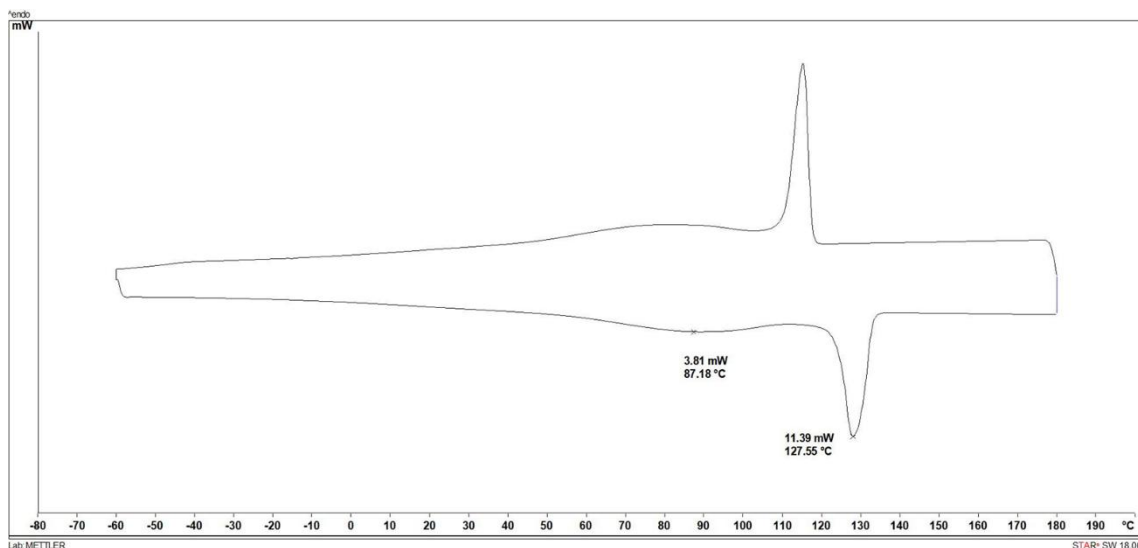

Figure S49. DSC curve of the polymer from Table 1, Entry 10.

**MW Averages**

Mp: 11005

Mn: 5415

Mv: 10324

Mw: 11290

Mz: 18470

Mz+1: 25174

PD: 2.0849

**Distribution Plots**

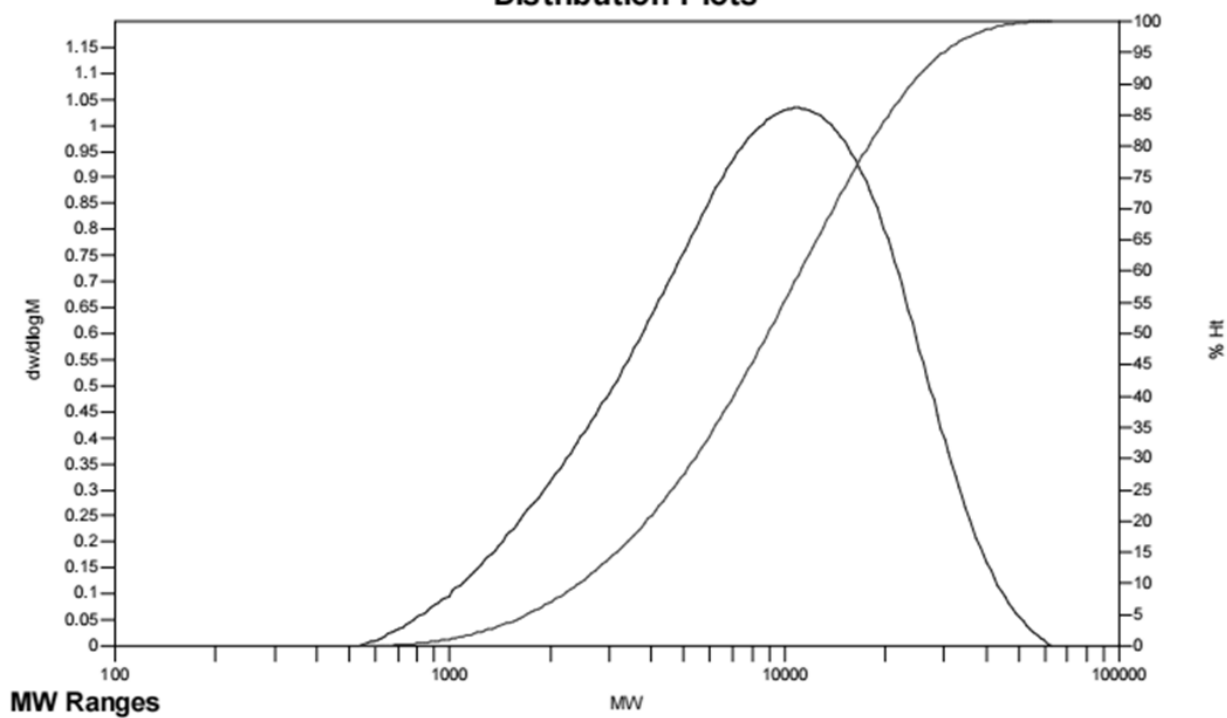

Figure S50. GPC trace of the polymer from Table 1, Entry 10.

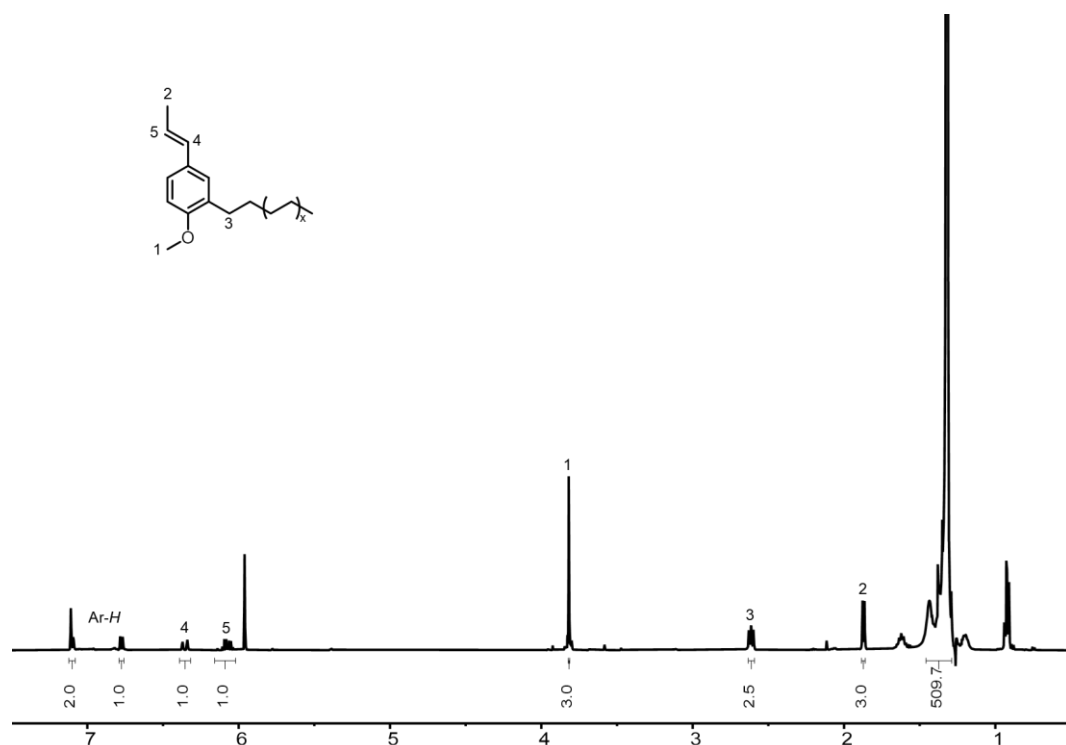

**Figure S51.**  $^1\text{H}$  NMR spectrum of the polymer from Table 1, Entry 11 (1,1,2,2-Tetrachloroethane- $d_2$ ).

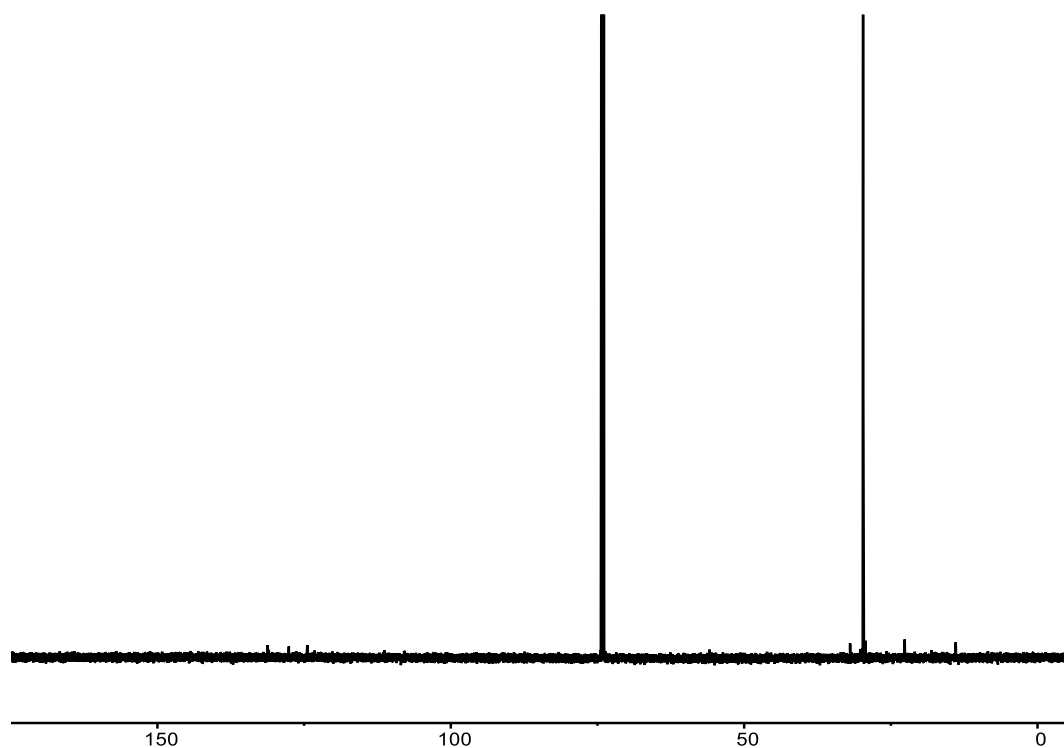

**Figure S52.**  $^{13}\text{C}$  NMR spectrum of the polymer from Table 1, Entry 11 (1,1,2,2-Tetrachloroethane- $d_2$ ).

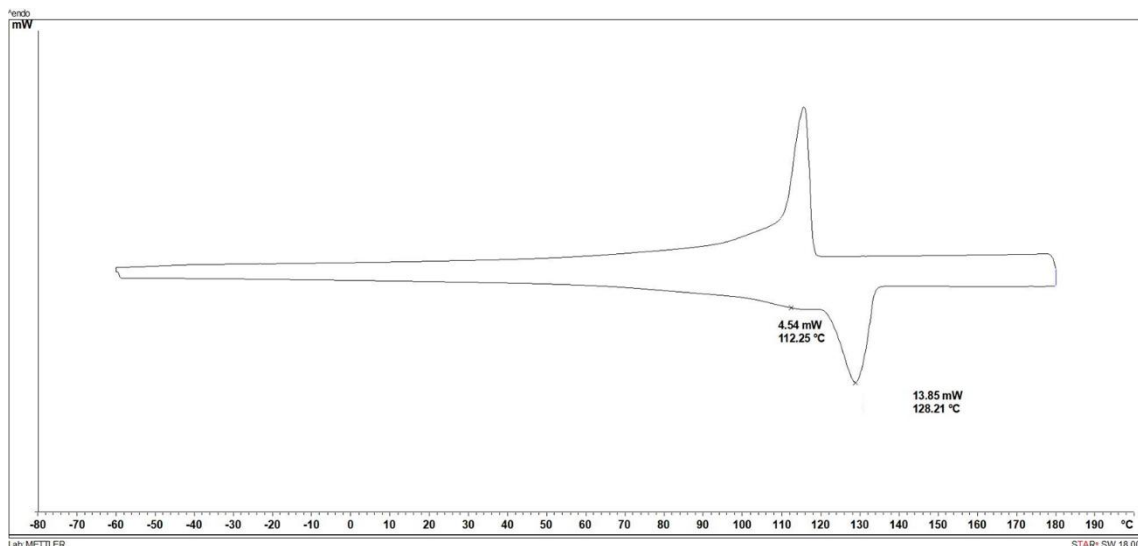

**Figure S53.** DSC curve of the polymer from Table 1, Entry 11.

**MW Averages**

Mp: 4551

Mn: 3028

Mv: 4520

Mw: 4817

Mz: 6979

Mz+1: 9001

PD: 1.5908

**Distribution Plots**

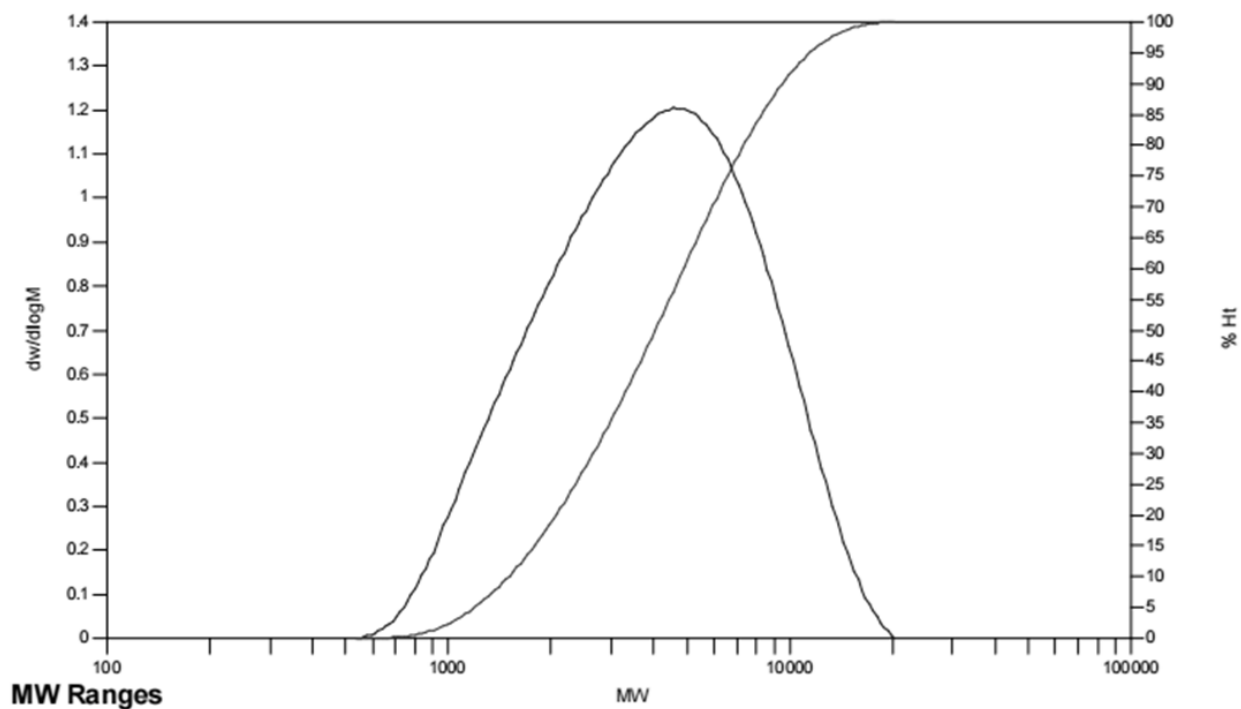

**Figure S54.** GPC trace of the polymer from Table 1, Entry 11.

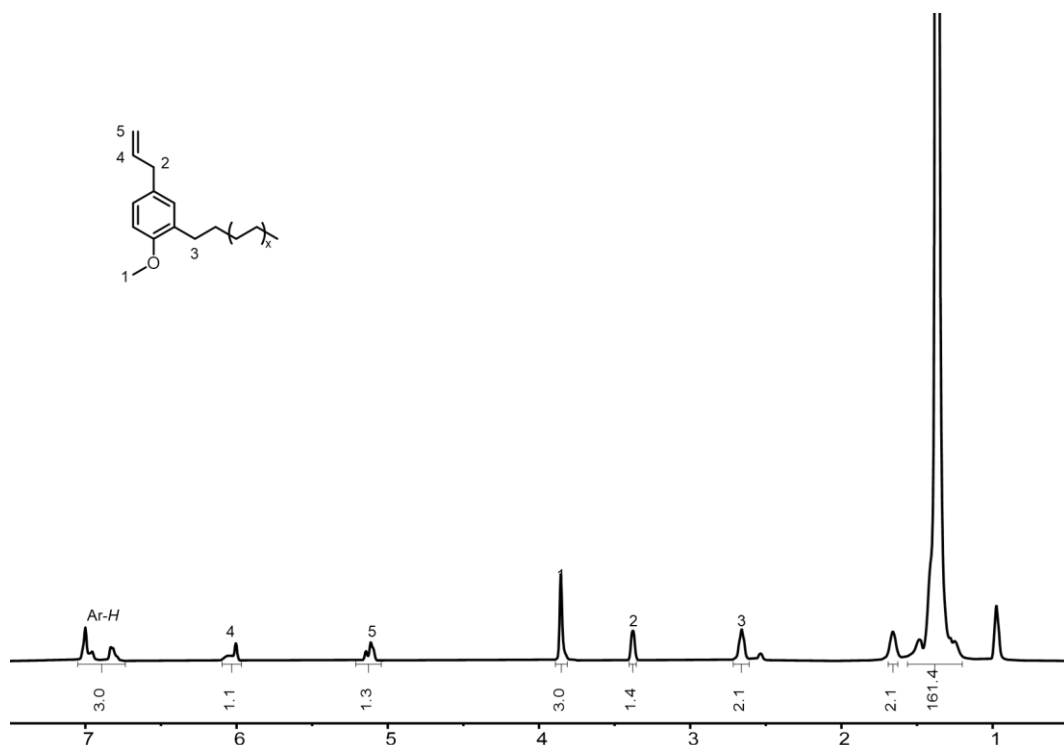

**Figure S55.** <sup>1</sup>H NMR spectrum of the polymer from Table 1, Entry 12 (1,1,2,2-Tetrachloroethane-d<sub>2</sub>).

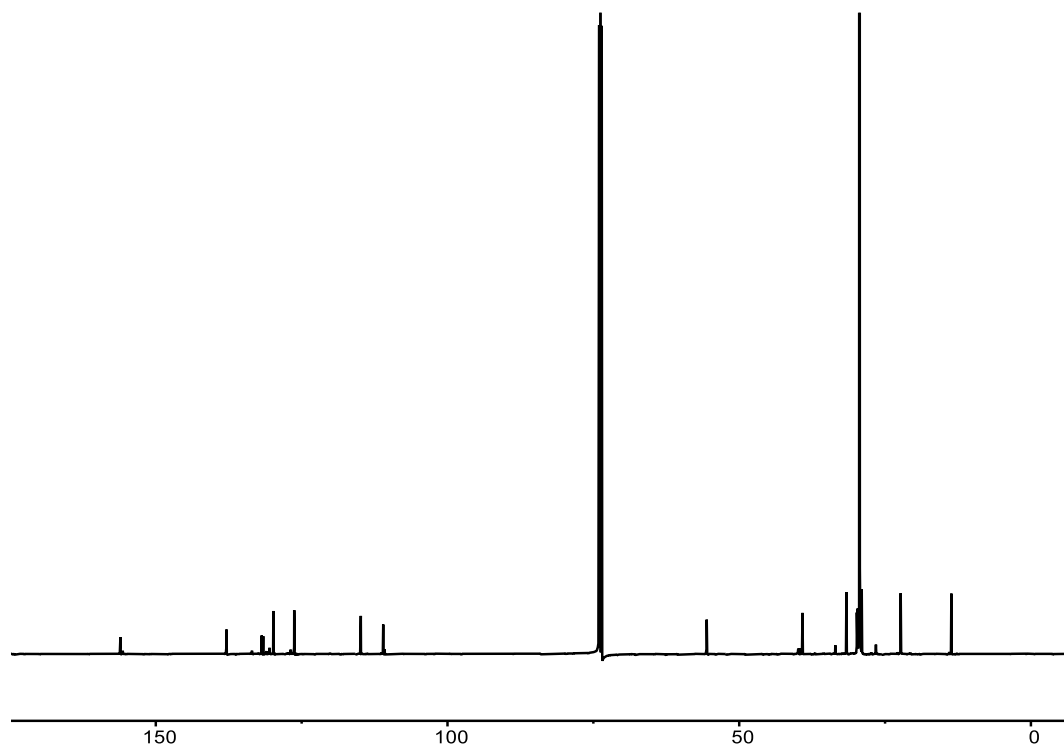

**Figure S56.** <sup>13</sup>C NMR spectrum of the polymer from Table 1, Entry 12 (1,1,2,2-Tetrachloroethane-d<sub>2</sub>).

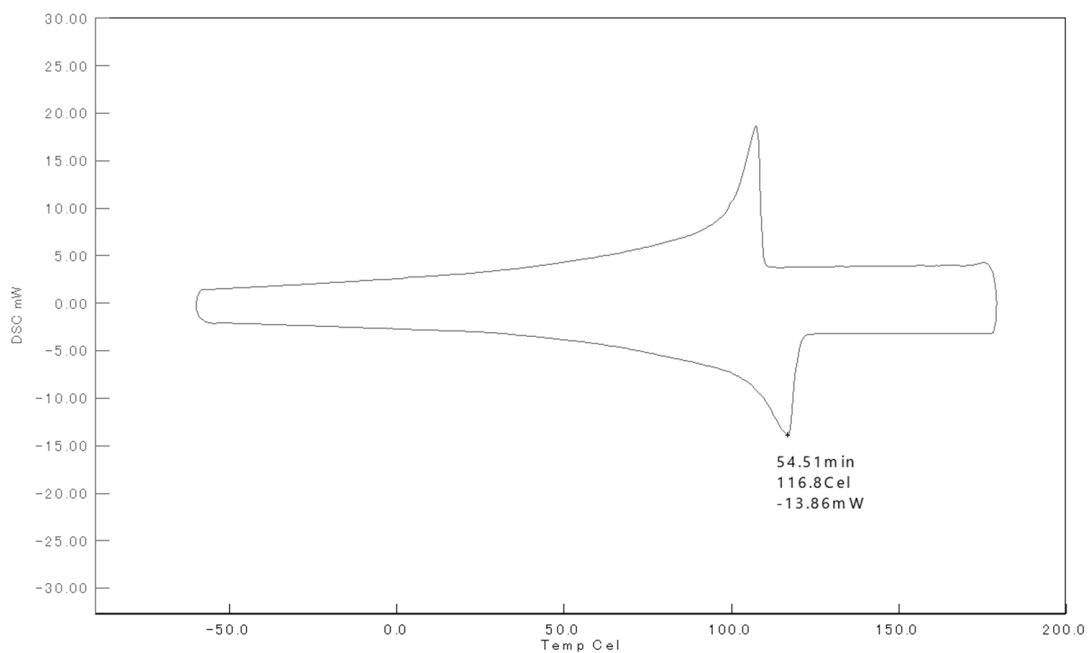

**Figure S57.** DSC curve of the polymer from Table 1, Entry 12.

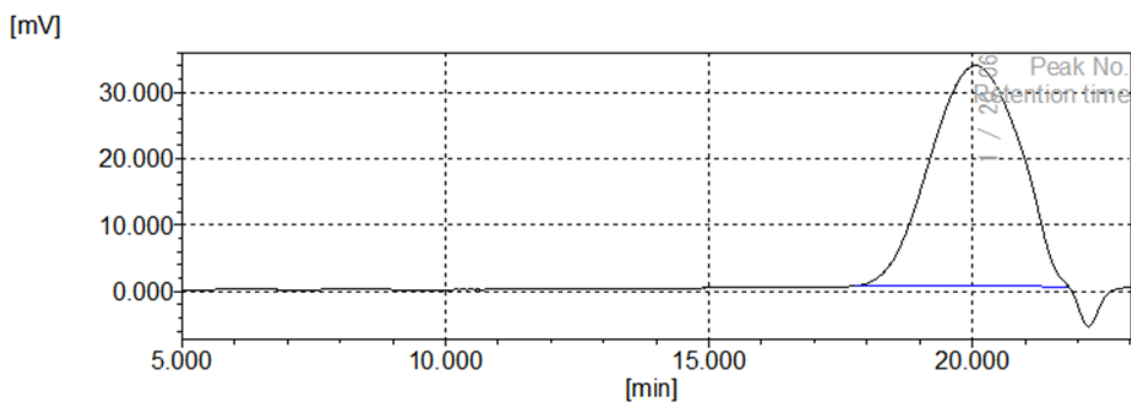

**Molecular mass calculation result (RI)**

| Total       | [min]  | [mV]   | [mol]      | Mn      |        |
|-------------|--------|--------|------------|---------|--------|
| Peak start  | 17.778 | 0.827  | 47,087     | Mw      | 5,941  |
| Peak top    | 20.063 | 34.026 | 4,487      | Mz      | 10,217 |
| Peak end    | 21.823 | 0.732  | 164        | Mz+1    | 14,981 |
|             |        |        |            | Mv      | 5,941  |
| Height [mV] |        |        | 33.253     | Mp      | 5,282  |
| Area [mV*s] |        |        | 3925.983   | Mz/Mw   | 1.720  |
| Height% [%] |        |        | 100.000    | Mw/Mn   | 2.131  |
| [eta]       |        |        | 5940.75079 | Mz+1/Mw | 2.522  |

**Figure S58.** GPC trace of the polymer from Table 1, Entry 12.

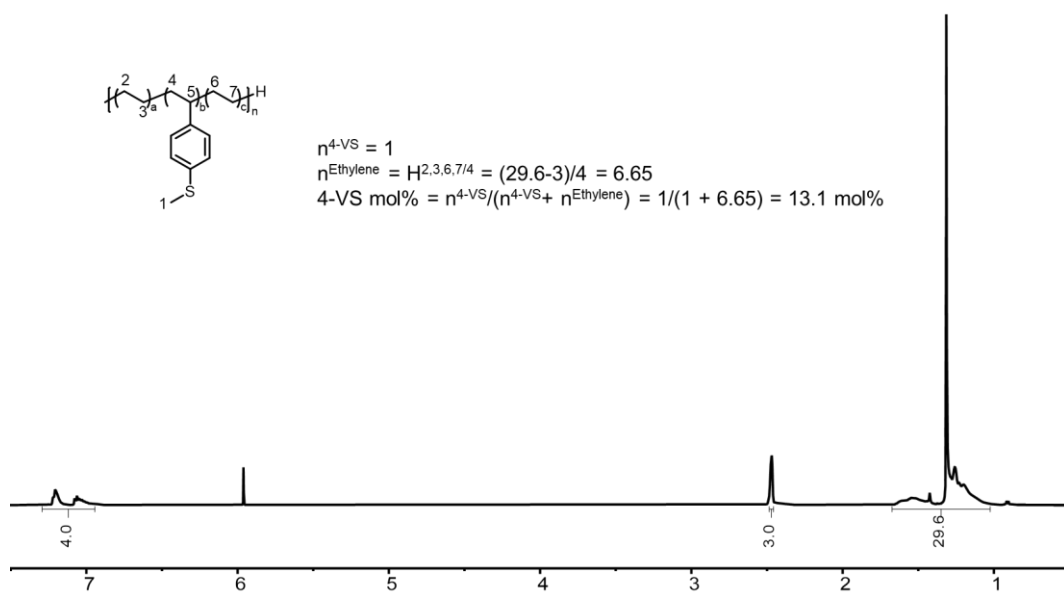

**Figure S59.**  $^1\text{H}$  NMR spectrum of the polymer from Table 2, Entry 1 (1,1,2,2-Tetrachloroethane- $d_2$ ).

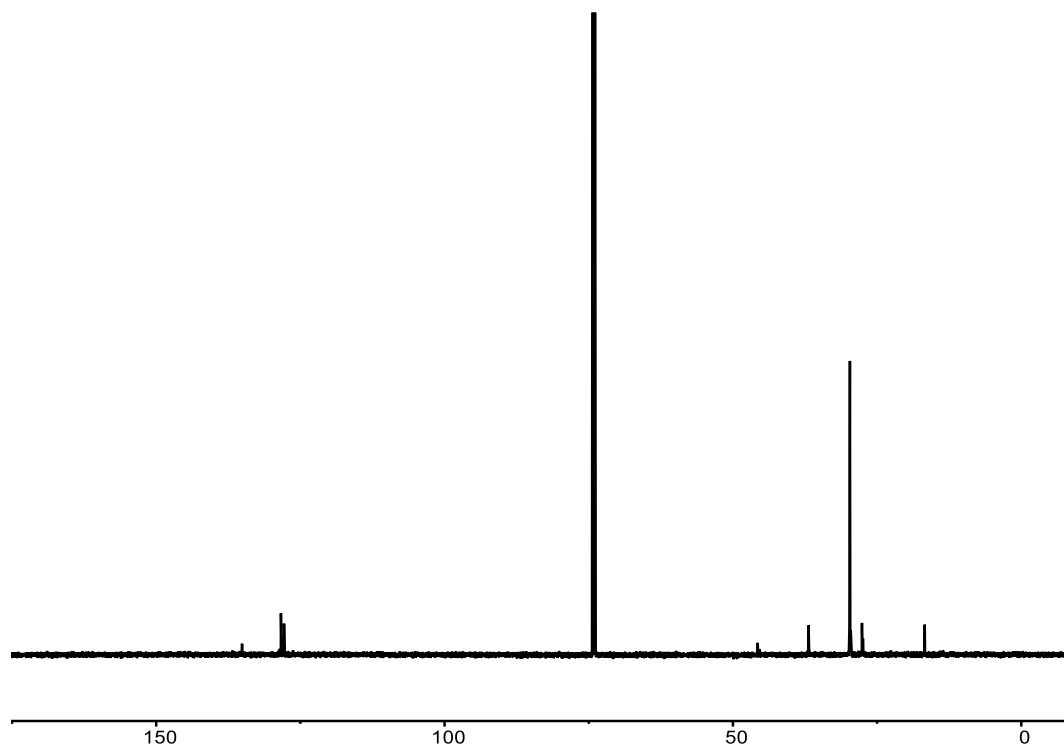

**Figure S60.**  $^{13}\text{C}$  NMR spectrum of the polymer from Table 2, Entry 1 (1,1,2,2-Tetrachloroethane- $d_2$ ).

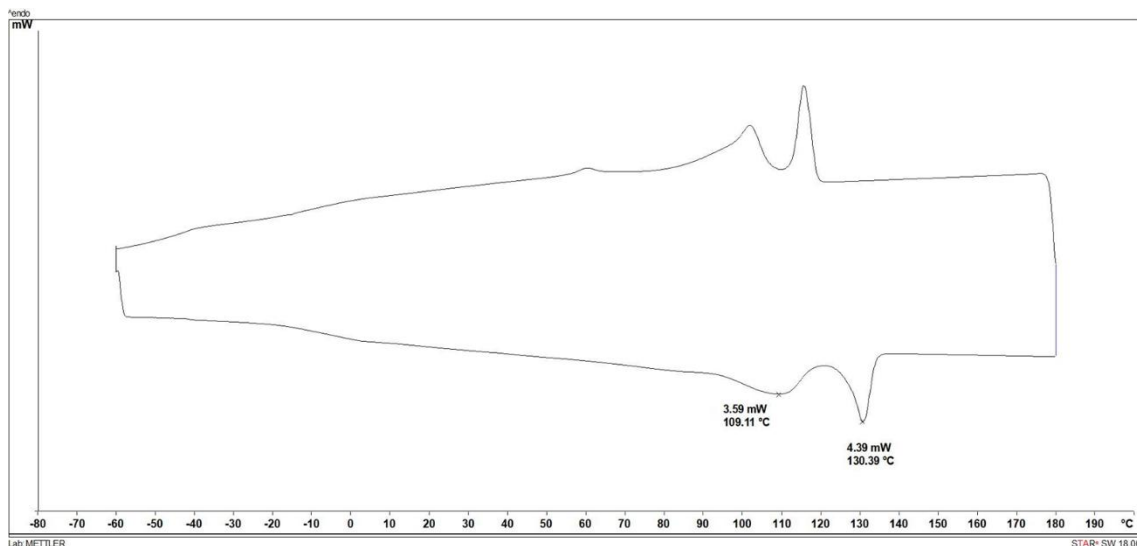

**Figure S61.** DSC curve of the polymer from Table 2, Entry 1.

**MW Averages**

|           |             |            |           |
|-----------|-------------|------------|-----------|
| Mp: 32682 | Mn: 27019   | Mv: 36641  | Mw: 38601 |
| Mz: 53325 | Mz+1: 68875 | PD: 1.4287 |           |

**Distribution Plots**

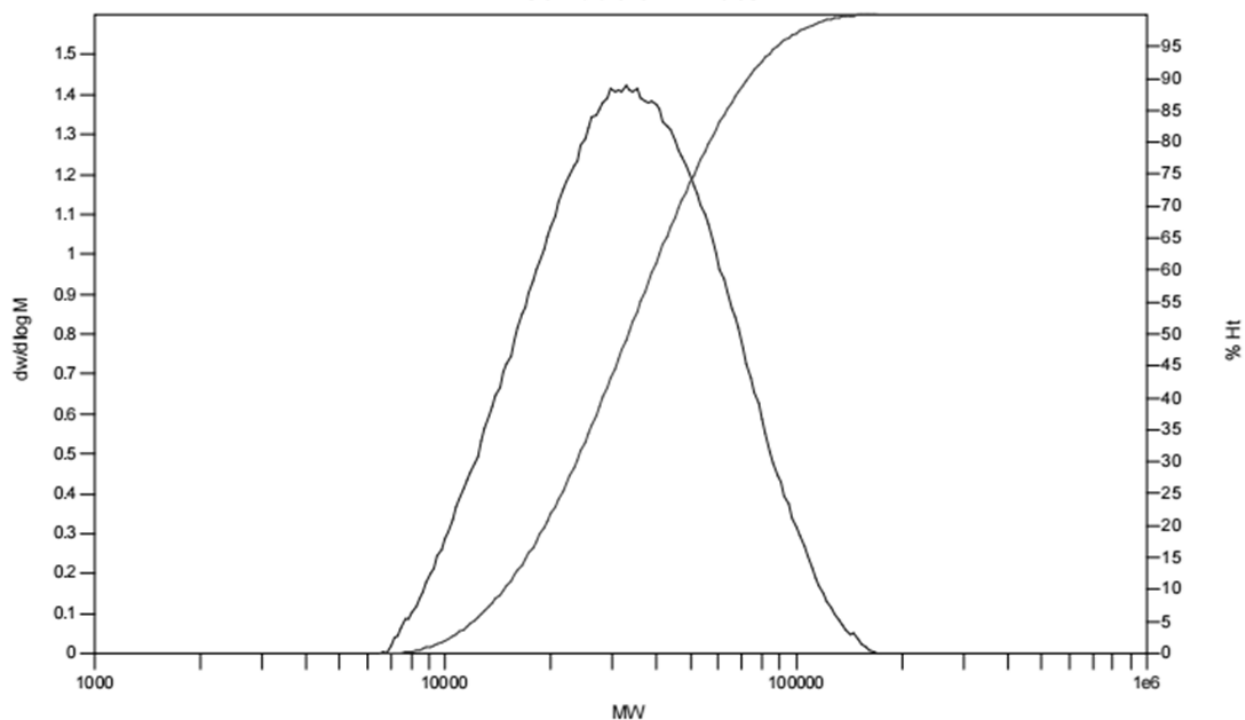

**Figure S62.** GPC trace of the polymer from Table 2, Entry 1.

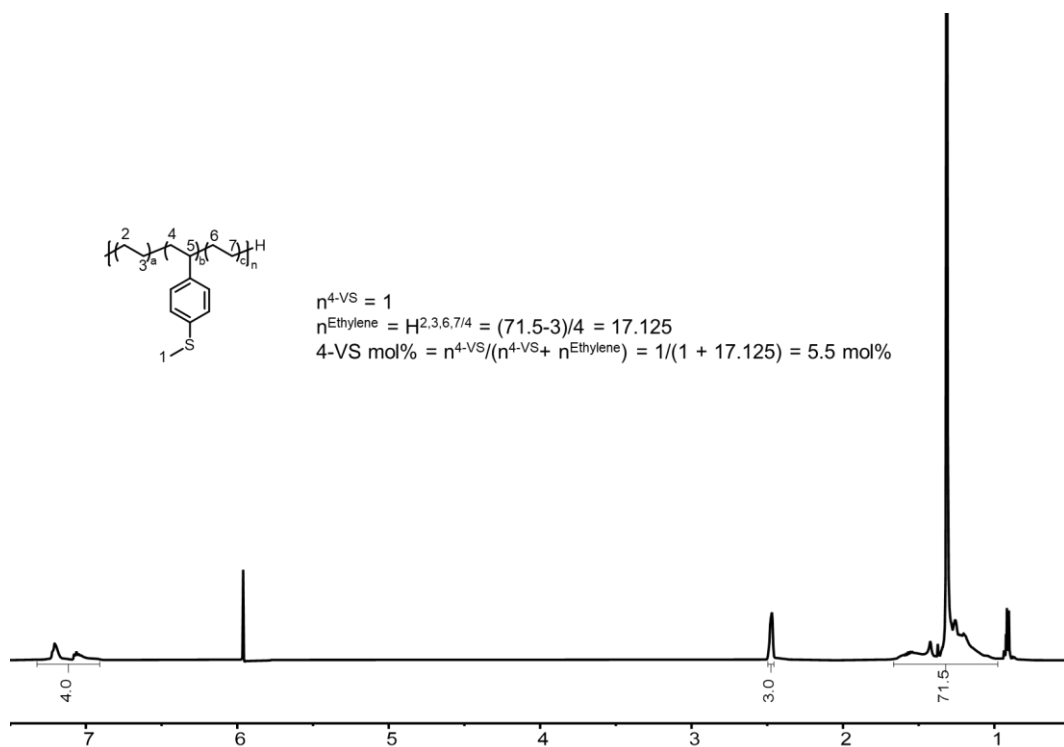

**Figure S63.**  $^1\text{H}$  NMR spectrum of the polymer from Table 2, Entry 2 (1,1,2,2-Tetrachloroethane- $d_2$ ).

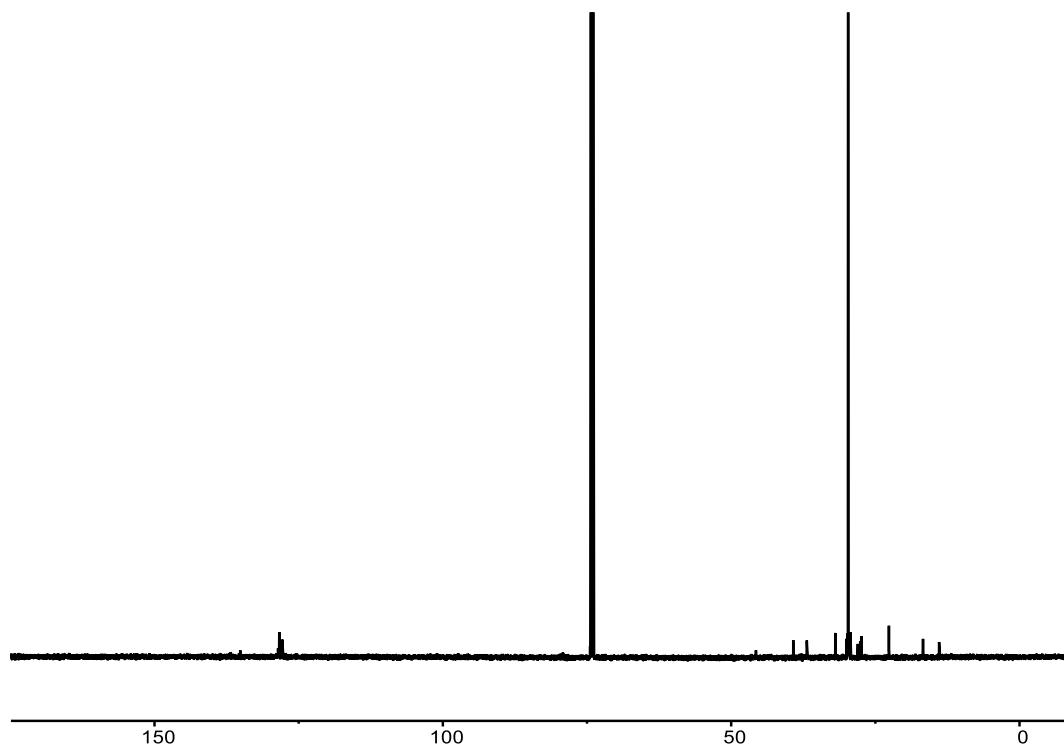

**Figure S64.**  $^{13}\text{C}$  NMR spectrum of the polymer from Table 2, Entry 2 (1,1,2,2-Tetrachloroethane- $d_2$ ).

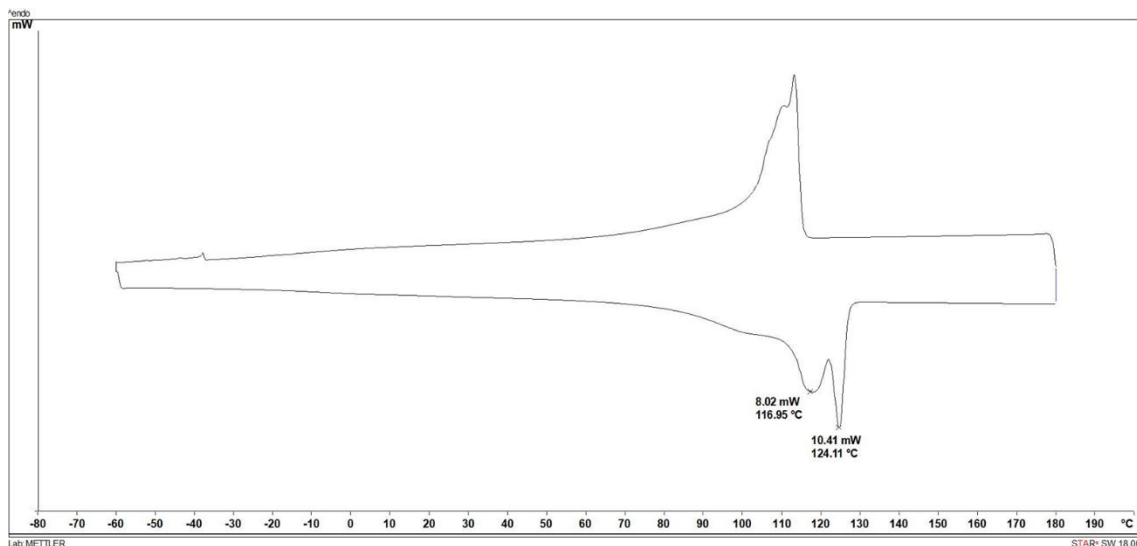

Figure S65. DSC curve of the polymer from Table 2, Entry 2.

**MW Averages**

|          |             |            |          |
|----------|-------------|------------|----------|
| Mp: 6056 | Mn: 3760    | Mv: 5866   | Mw: 6286 |
| Mz: 9612 | Mz+1: 13857 | PD: 1.6718 |          |

**Distribution Plots**

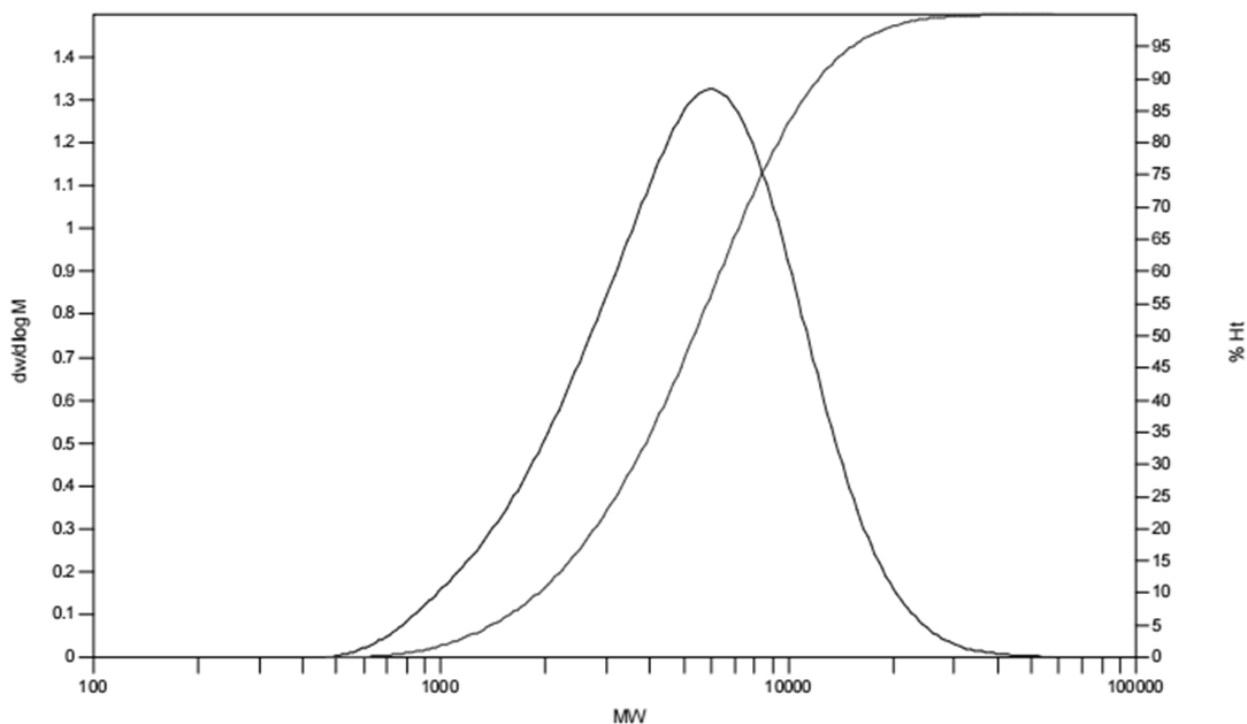

Figure S66. GPC trace of the polymer from Table 2, Entry 2.

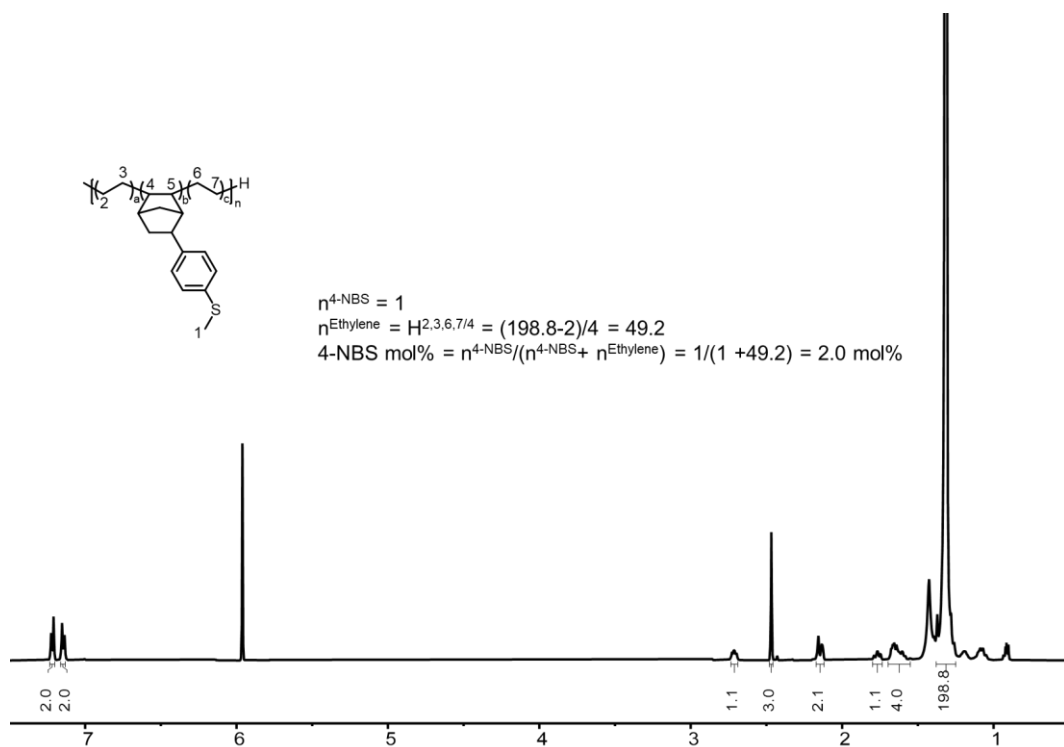

**Figure S67.**  $^1\text{H}$  NMR spectrum of the polymer from Table 2, Entry 3 (1,1,2,2-Tetrachloroethane- $d_2$ ).

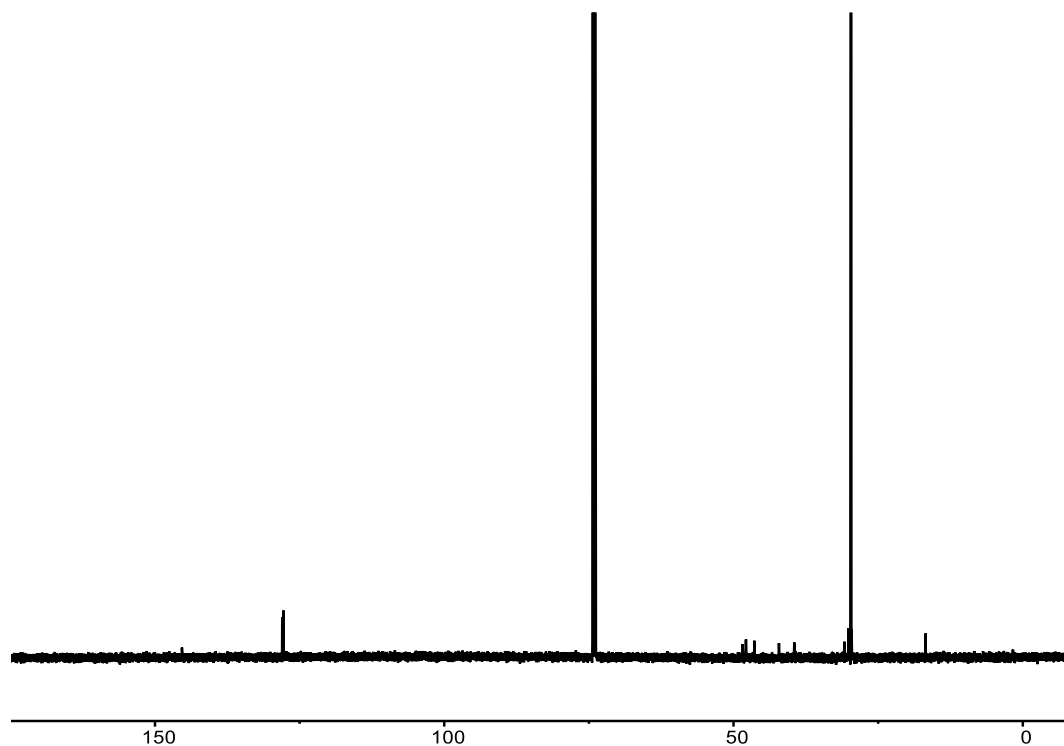

**Figure S68.**  $^{13}\text{C}$  NMR spectrum of the polymer from Table 2, Entry 3 (1,1,2,2-Tetrachloroethane- $d_2$ ).

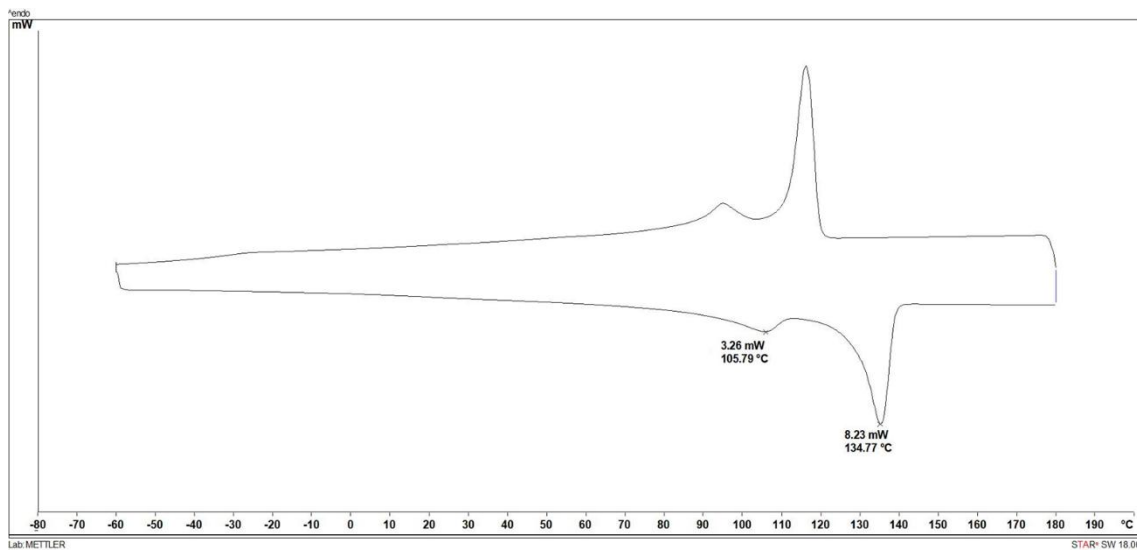

**Figure S69.** DSC curve of the polymer from Table 2, Entry 3.

**MW Averages**

|           |             |            |           |
|-----------|-------------|------------|-----------|
| Mp: 34003 | Mn: 21110   | Mv: 34568  | Mw: 37132 |
| Mz: 56695 | Mz+1: 78165 | PD: 1.7590 |           |

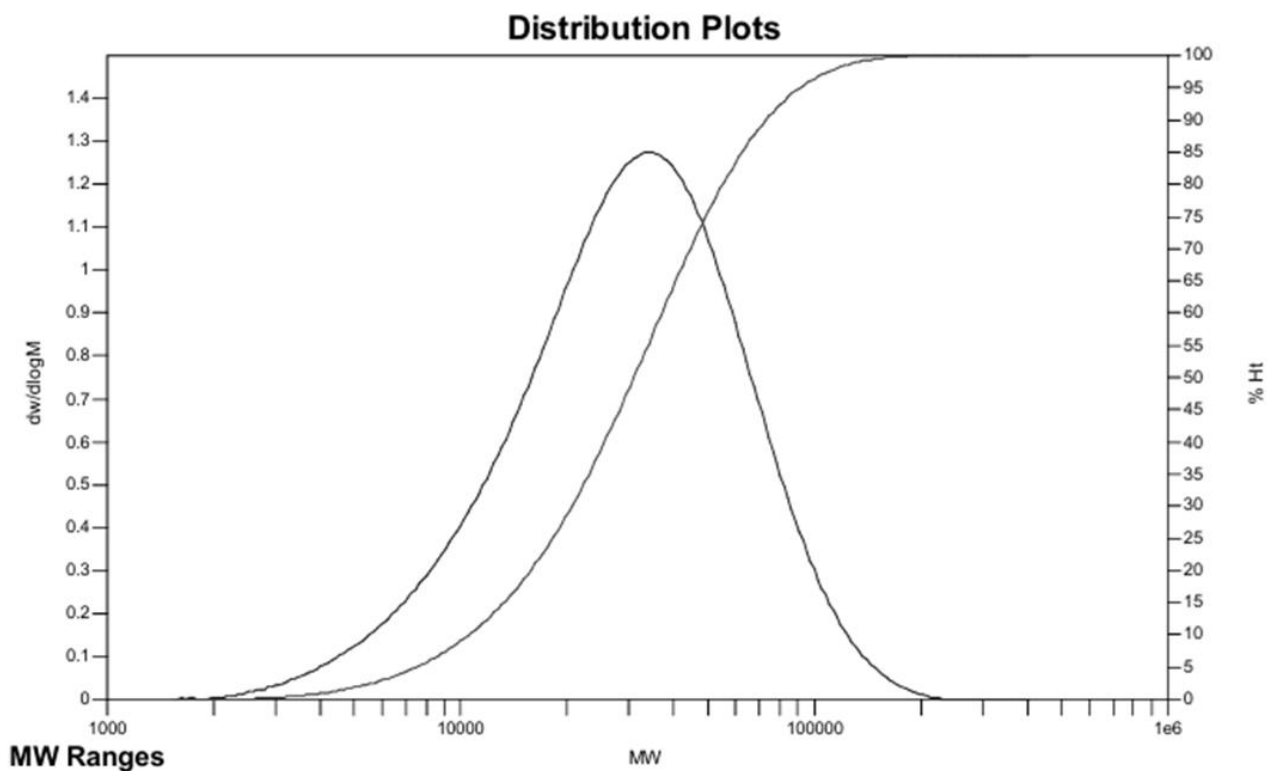

**Figure S70.** GPC trace of the polymer from Table 2, Entry 3.

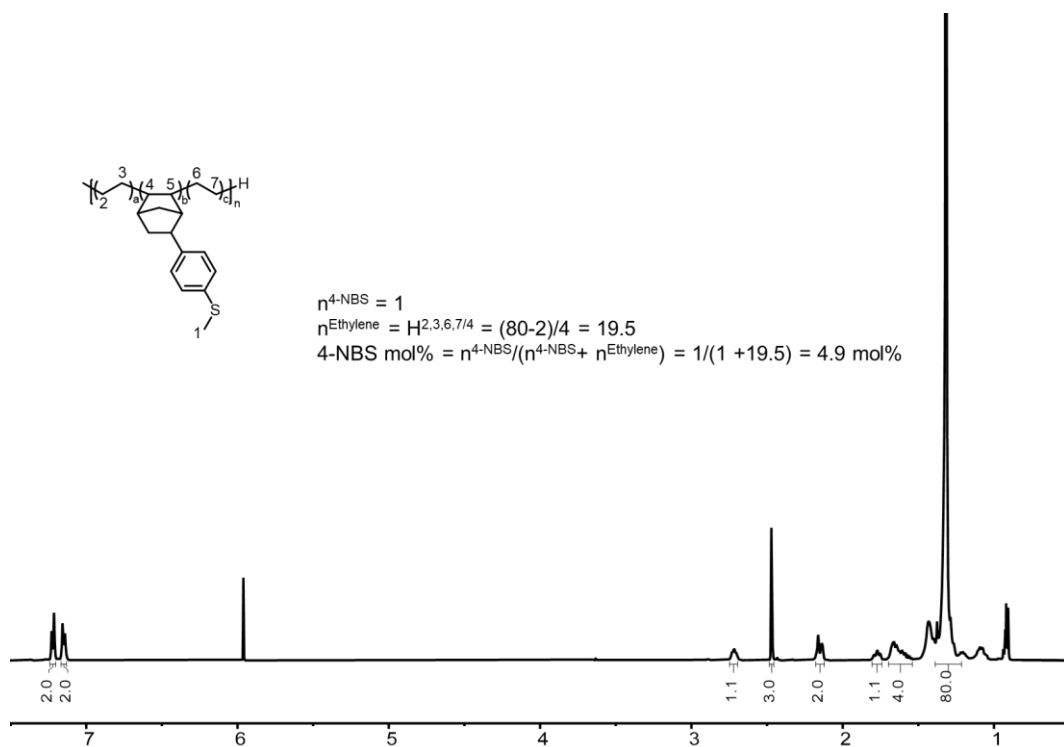

**Figure S71.**  $^1\text{H}$  NMR spectrum of the polymer from Table 2, Entry 4 (1,1,2,2-Tetrachloroethane- $d_2$ ).

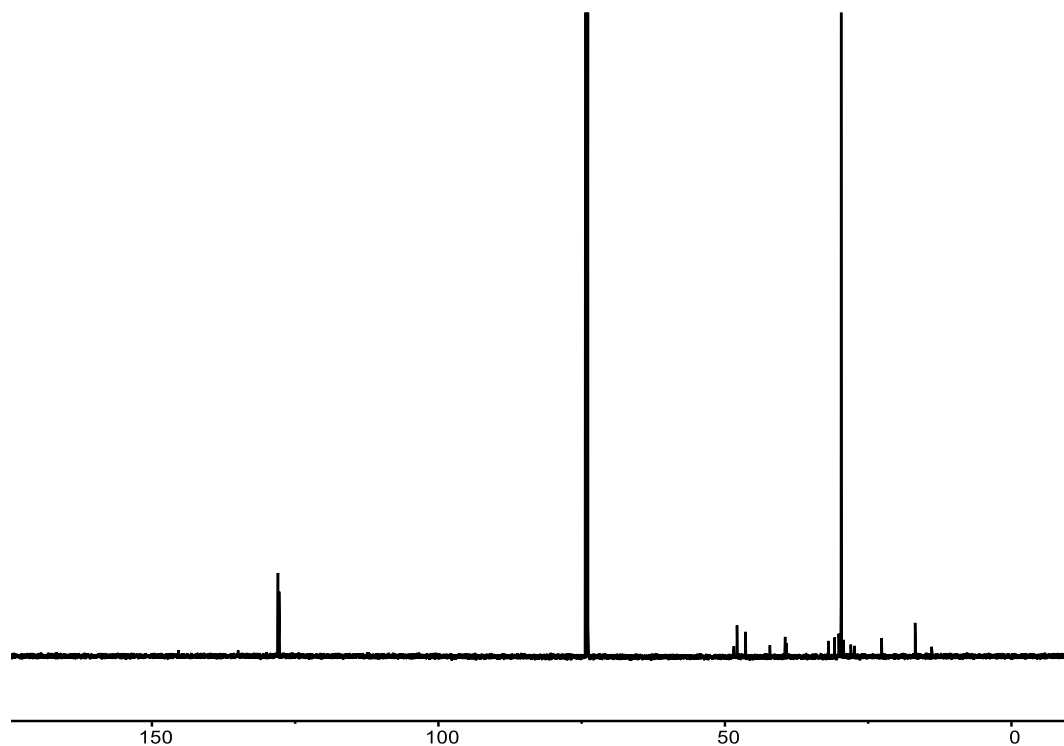

**Figure S72.**  $^{13}\text{C}$  NMR spectrum of the polymer from Table 2, Entry 4 (1,1,2,2-Tetrachloroethane- $d_2$ ).

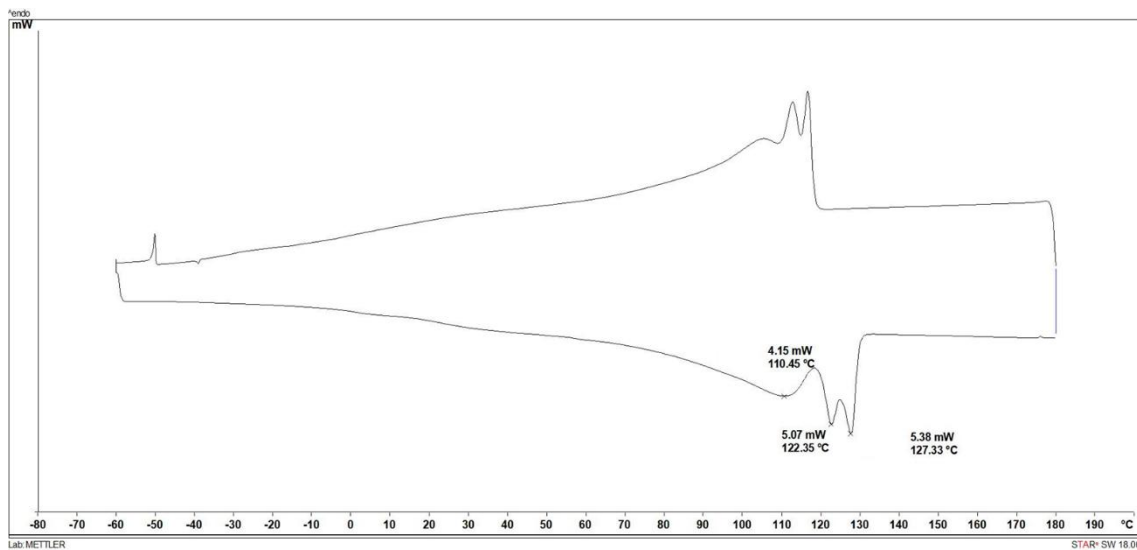

Figure S73. DSC curve of the polymer from Table 2, Entry 4.

**MW Averages**

|           |              |            |           |
|-----------|--------------|------------|-----------|
| Mp: 7855  | Mn: 4929     | Mv: 10464  | Mw: 12444 |
| Mz: 44250 | Mz+1: 112276 | PD: 2.5247 |           |

**Distribution Plots**

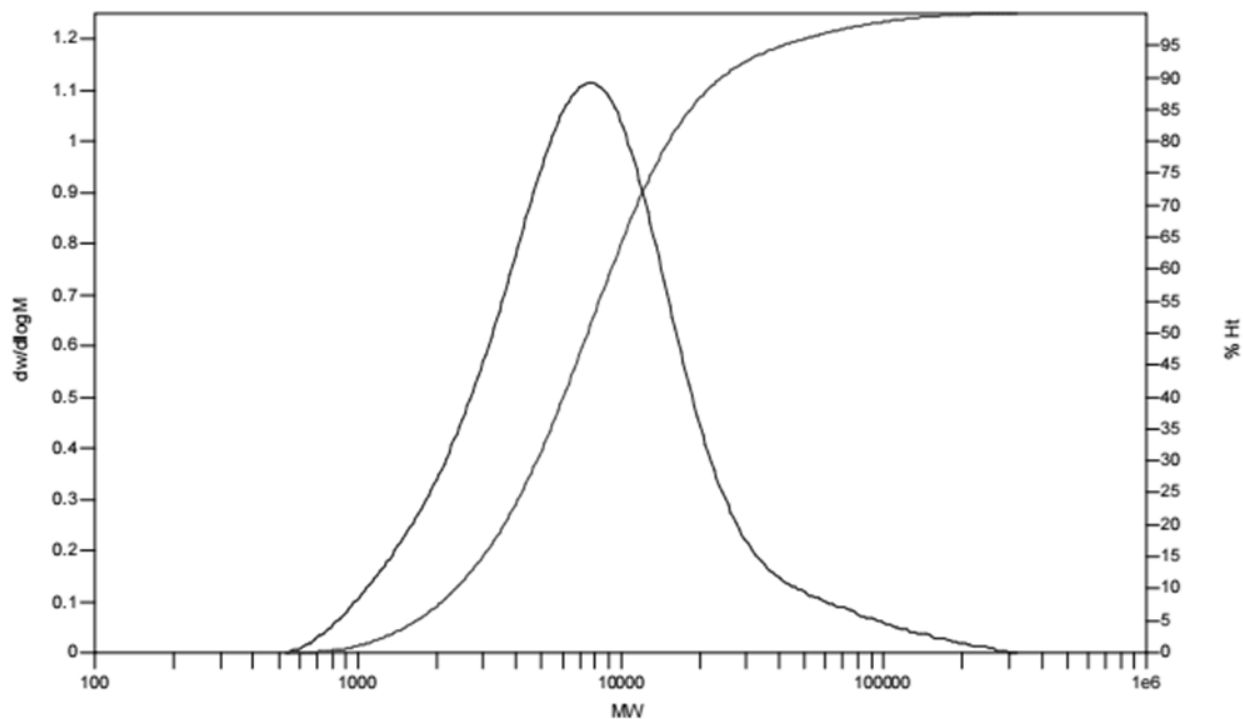

Figure S74. GPC trace of the polymer from Table 2, Entry 4.

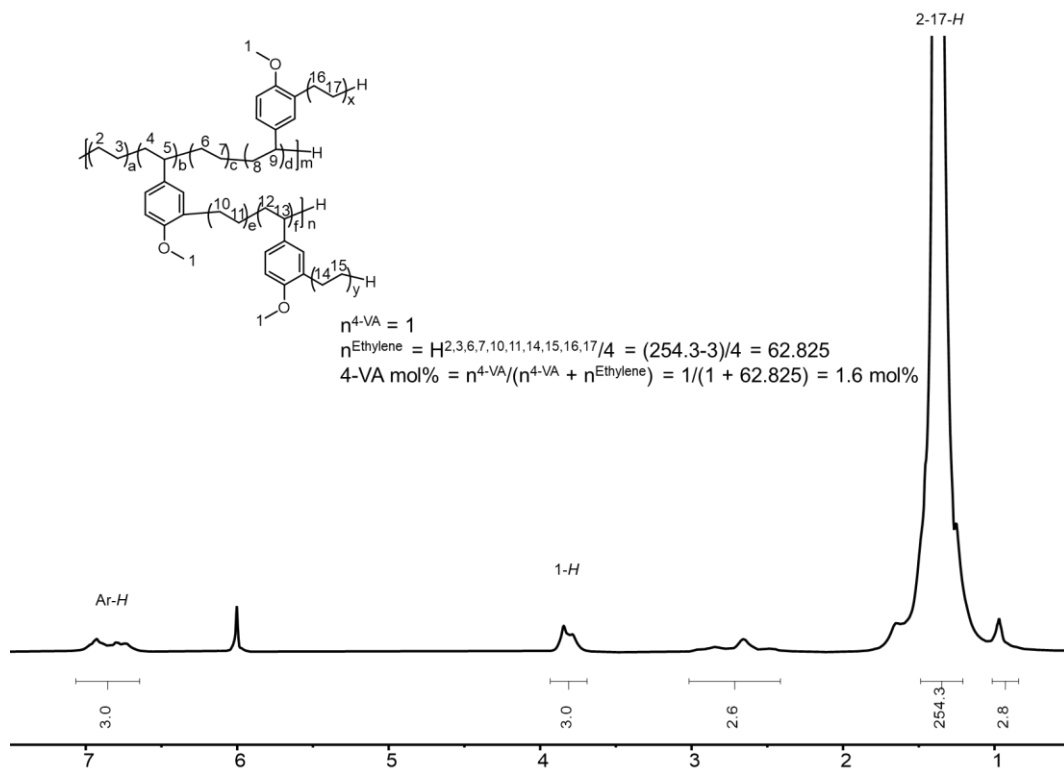

**Figure S75.**  $^1\text{H}$  NMR spectrum of the polymer from Table S1, Entry 2 (1,1,2,2-Tetrachloroethane- $d_2$ ).

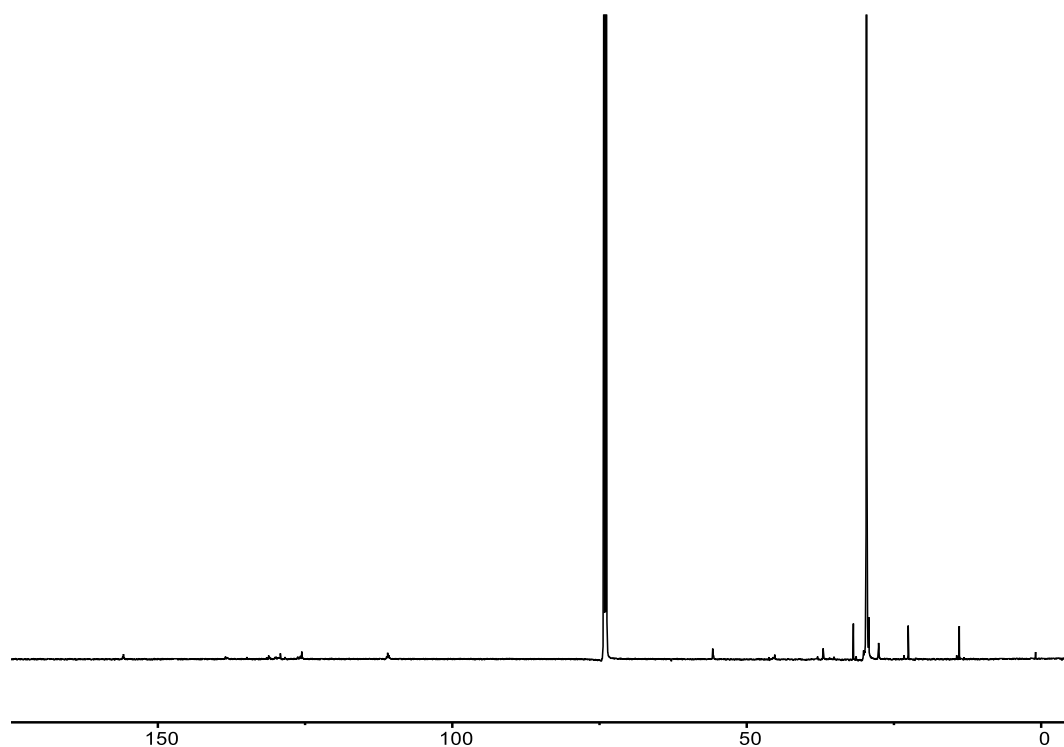

**Figure S76.**  $^{13}\text{C}$  NMR spectrum of the polymer from Table S1, Entry 2 (1,1,2,2-Tetrachloroethane- $d_2$ ).

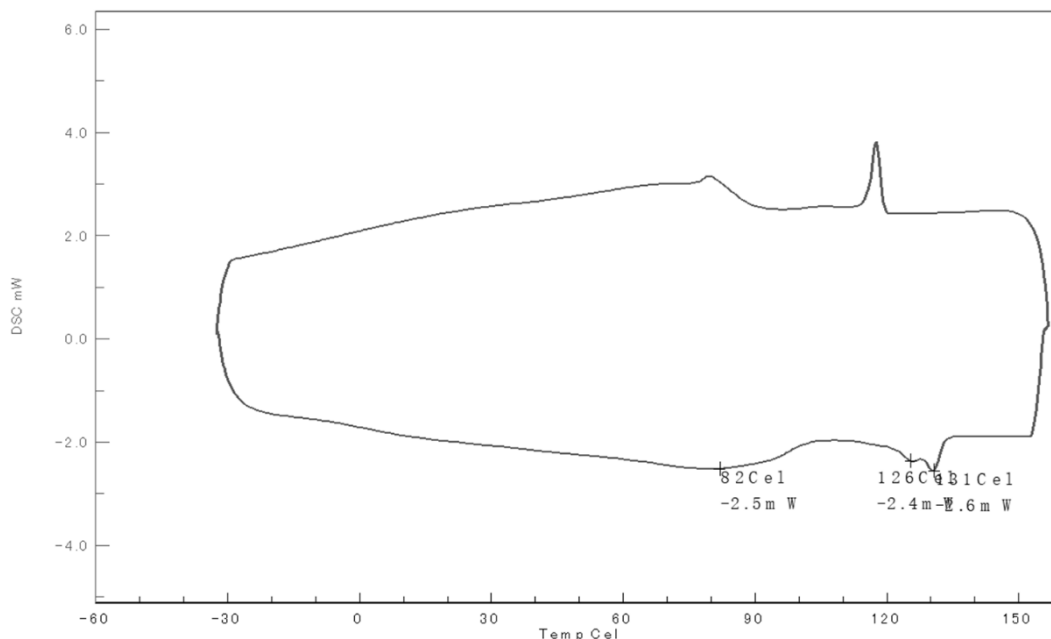

**Figure S77.** DSC curve of the polymer from Table S1, Entry 2.

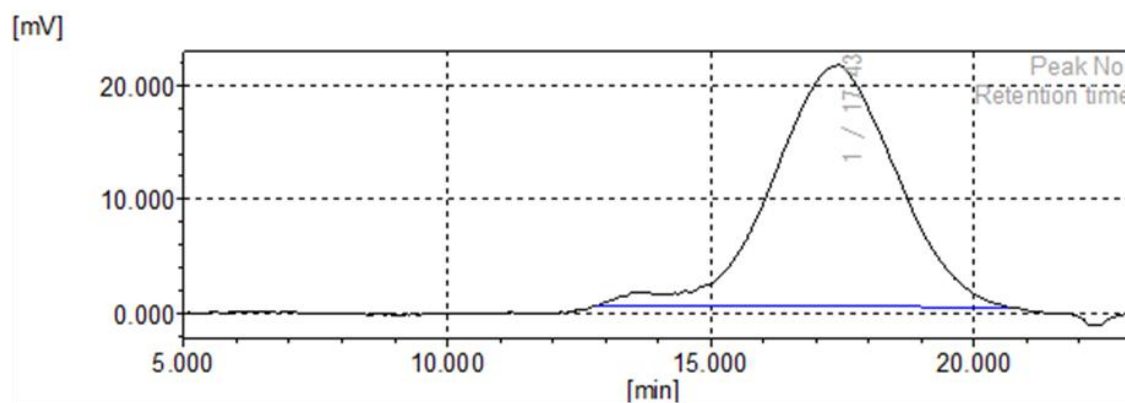

**Molecular mass calculation result (RI)**

| Total       |        | [min]  | [mV]         | [mol]   | Mn         | 52,582 |
|-------------|--------|--------|--------------|---------|------------|--------|
| Peak start  | 12.832 | 0.770  | 28,522,217   | Mw      | 227,172    |        |
| Peak top    | 17.432 | 21.734 | 85,278       | Mz      | 2,969,094  |        |
| Peak end    | 20.662 | 0.620  | 3,113        | Mz+1    | 10,286,397 |        |
|             |        |        |              | Mv      | 227,172    |        |
| Height [mV] |        |        | 21.052       | Mp      | 100,644    |        |
| Area [mV*s] |        |        | 3435.874     | Mz/Mw   | 13.070     |        |
| Height% [%] |        |        | 100.000      | Mw/Mn   | 4.320      |        |
| [eta]       |        |        | 227171.84575 | Mz+1/Mw | 45.280     |        |

**Figure S78.** GPC trace of the polymer from Table S1, Entry 2.

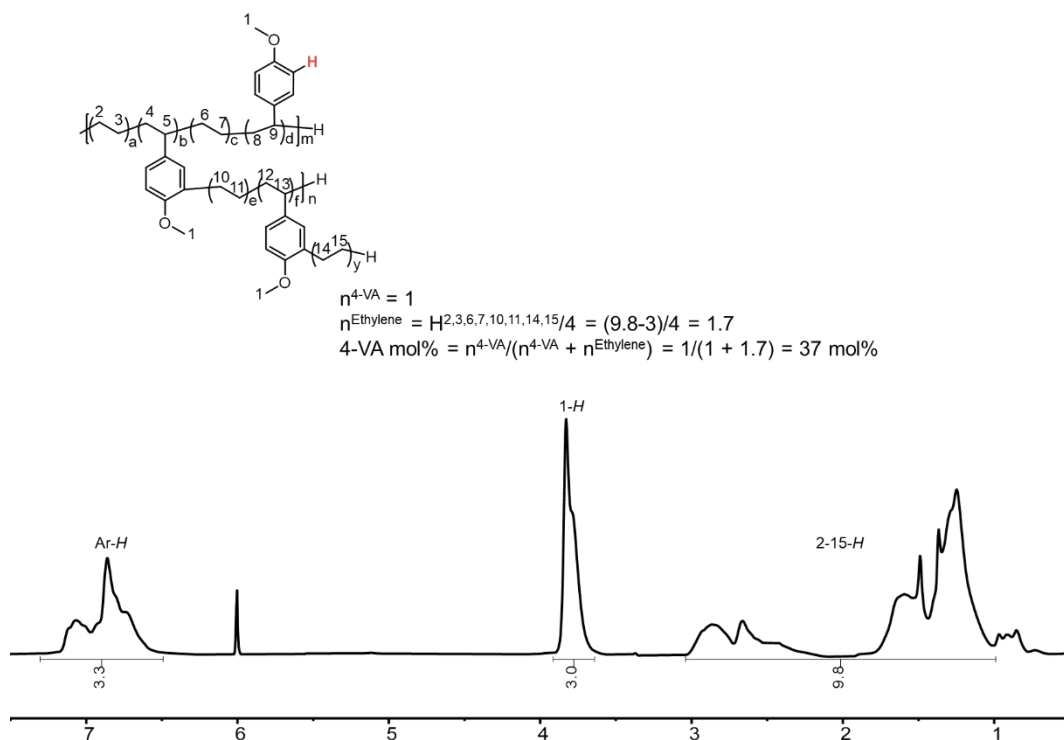

**Figure S79.**  $^1\text{H}$  NMR spectrum of the polymer from Table S1, Entry 3 (1,1,2,2-Tetrachloroethane- $d_2$ ).

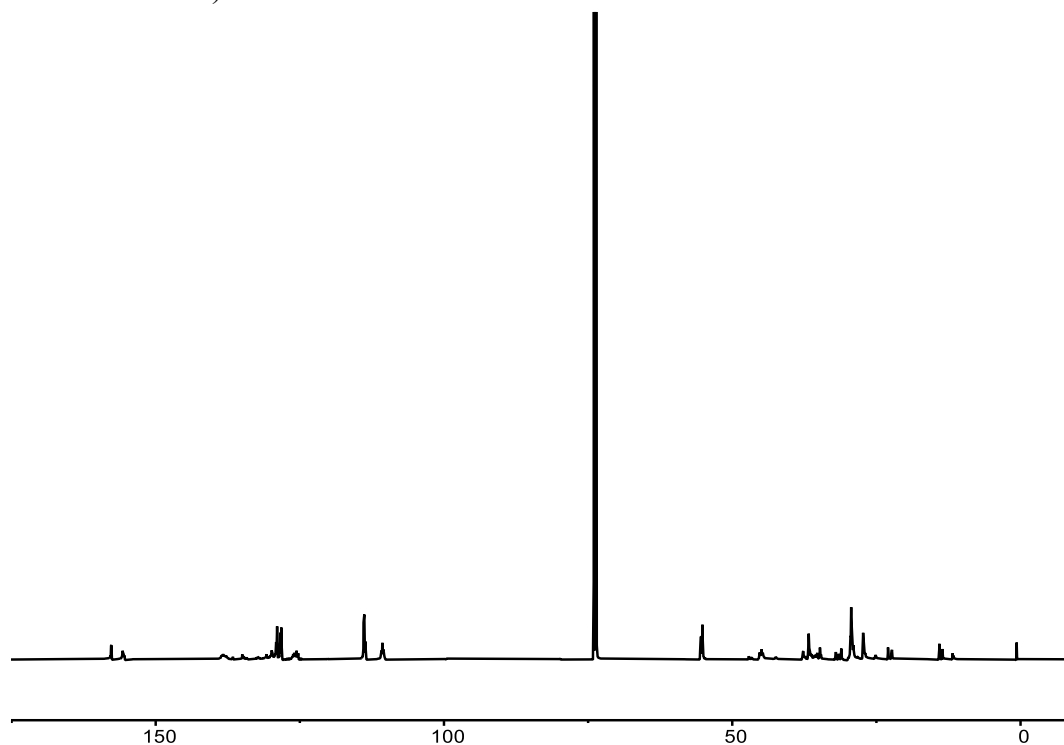

**Figure S80.**  $^{13}\text{C}$  NMR spectrum of the polymer from Table S1, Entry 3 (1,1,2,2-Tetrachloroethane- $d_2$ ).

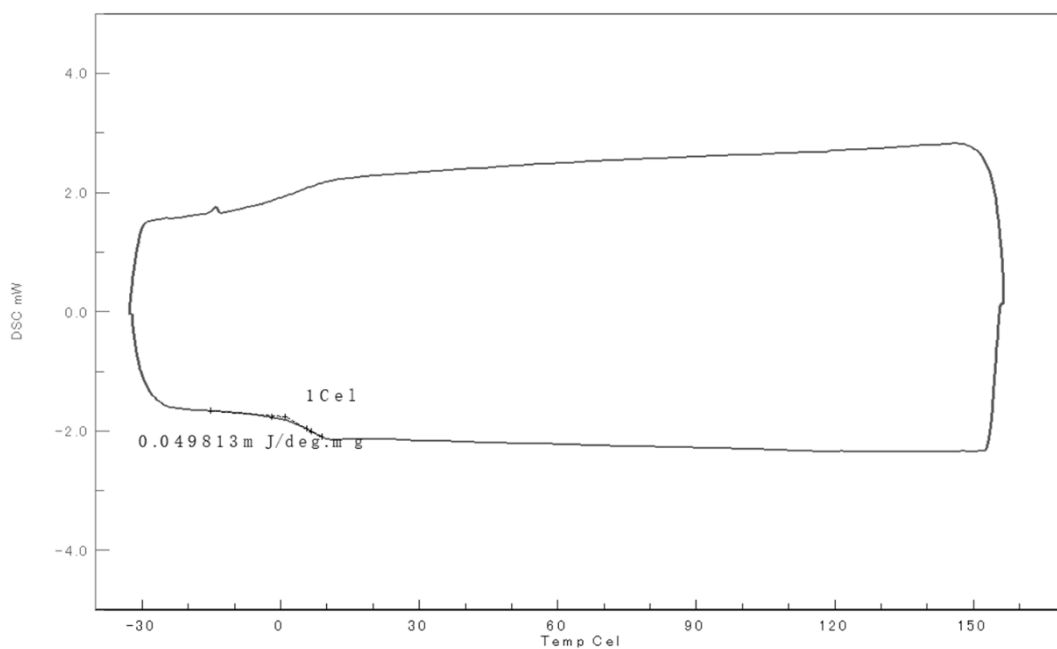

**Figure S81.** DSC curve of the polymer from Table S1, Entry 3.

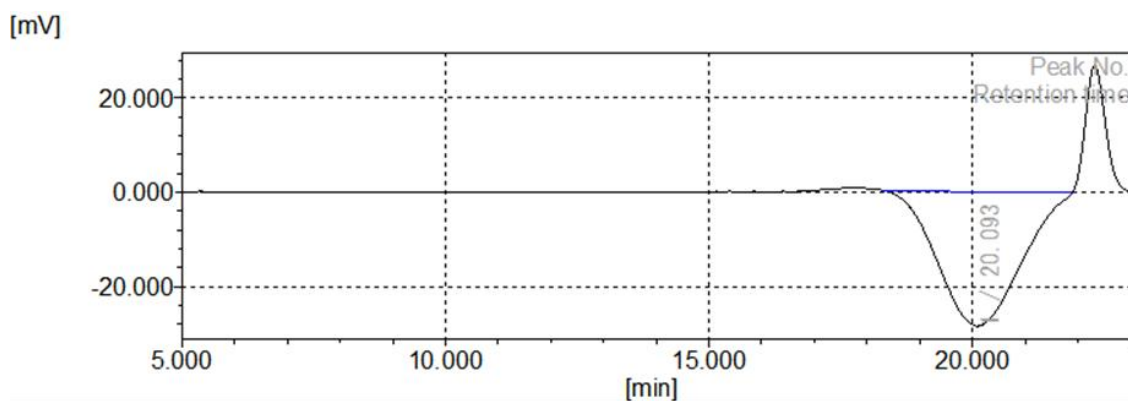

**Molecular mass calculation result (RI)**

| Total       |        |         |            | Mn      | 3,566  |
|-------------|--------|---------|------------|---------|--------|
|             | [min]  | [mV]    | [mol]      | Mw      | 6,544  |
| Peak start  | 18.323 | 0.356   | 34,558     | Mz      | 9,774  |
| Peak top    | 20.093 | -28.410 | 5,759      | Mz+1    | 12,985 |
| Peak end    | 21.897 | -0.117  | 250        | Mv      | 6,544  |
| Height [mV] |        |         | 28.532     | Mp      | 6,406  |
| Area [mV*s] |        |         | 2905.533   | Mz/Mw   | 1.494  |
| Height% [%] |        |         | 100.000    | Mw/Mn   | 1.835  |
| [eta]       |        |         | 6544.13021 | Mz+1/Mw | 1.984  |

**Figure S82.** GPC trace of the polymer from Table S1, Entry 3.

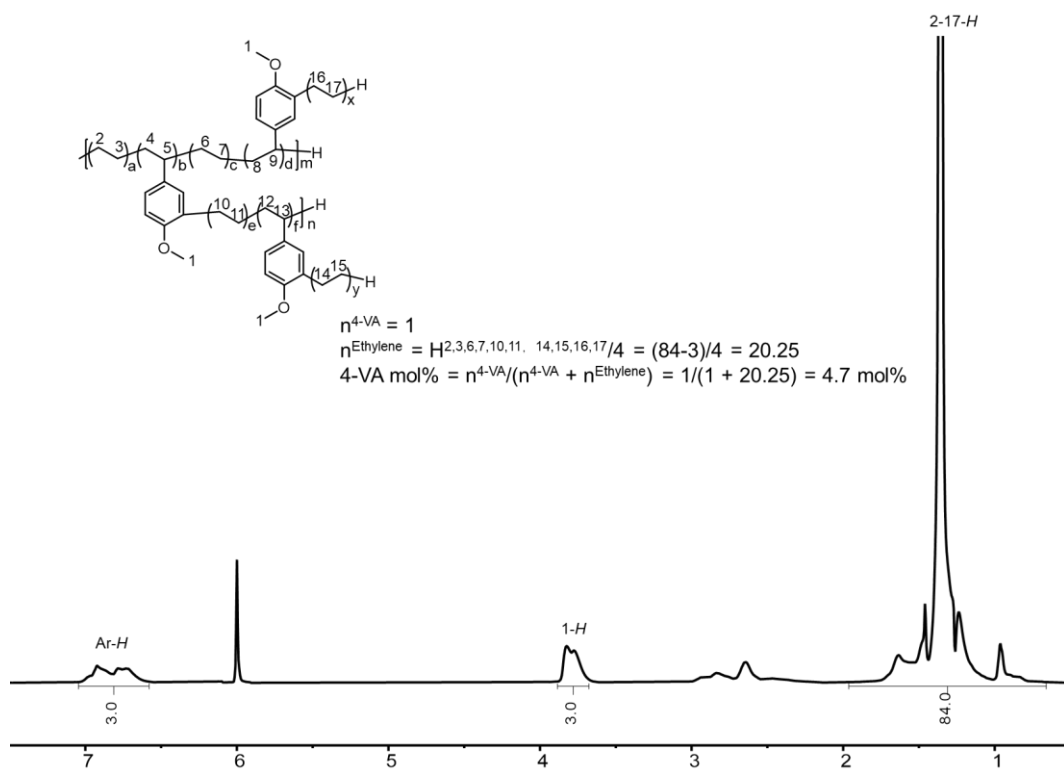

**Figure S83.**  $^1\text{H}$  NMR spectrum of the polymer from Table S1, Entry 4 (1,1,2,2-Tetrachloroethane- $d_2$ ).

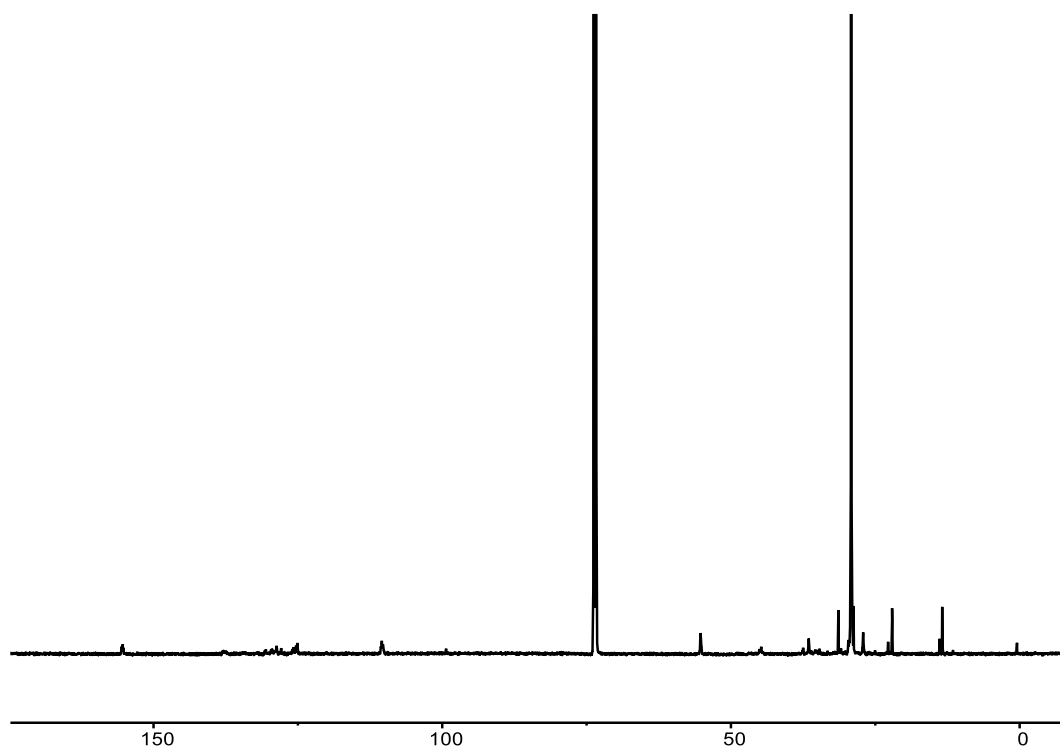

**Figure S84.**  $^{13}\text{C}$  NMR spectrum of the polymer from Table S1, Entry 4 (1,1,2,2-Tetrachloroethane- $d_2$ ).

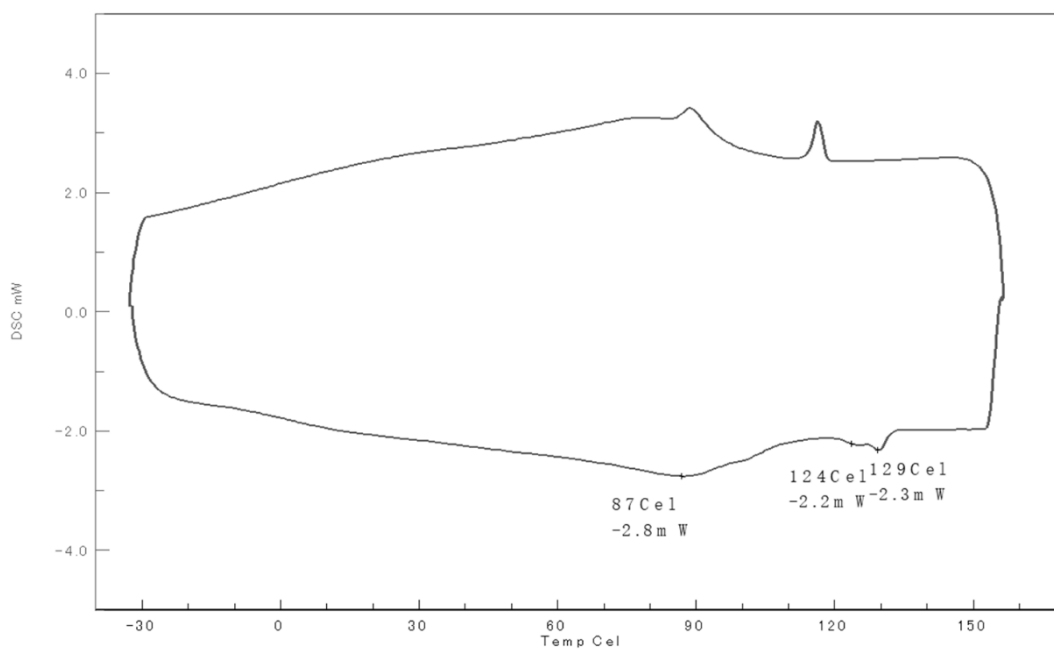

**Figure S85.** DSC curve of the polymer from Table S1, Entry 4.

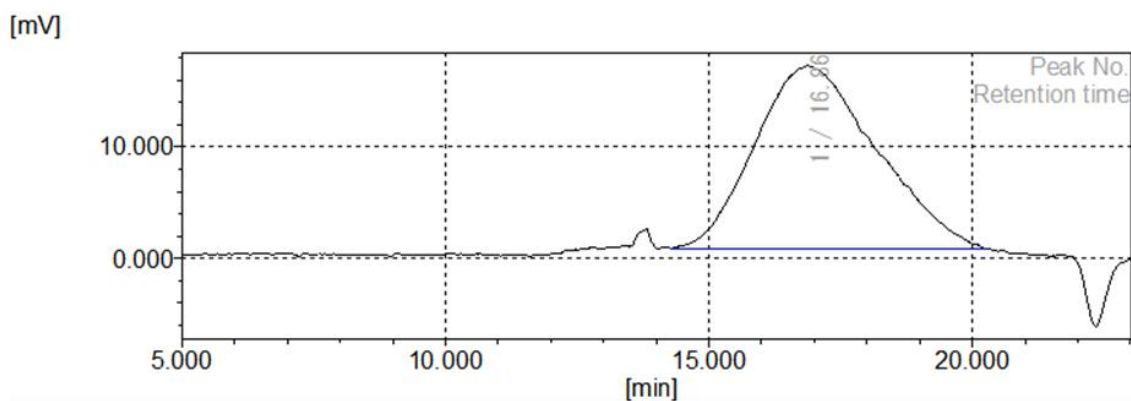

**Molecular mass calculation result (RI)**

| Total       | [min]  | [mV]   | [mol]        | Mn      | 63,806  |
|-------------|--------|--------|--------------|---------|---------|
| Peak start  | 14.265 | 0.923  | 1,386,075    | Mw      | 164,982 |
| Peak top    | 16.868 | 17.272 | 144,552      | Mz      | 300,769 |
| Peak end    | 20.287 | 0.894  | 4,655        | Mz+1    | 438,544 |
|             |        |        |              | Mv      | 164,982 |
| Height [mV] |        |        | 16.362       | Mp      | 153,204 |
| Area [mV*s] |        |        | 2602.765     | Mz/Mw   | 1.823   |
| Height% [%] |        |        | 100.000      | Mw/Mn   | 2.586   |
| [eta]       |        |        | 164982.28566 | Mz+1/Mw | 2.658   |

**Figure S86.** GPC trace of the polymer from Table S1, Entry 4.

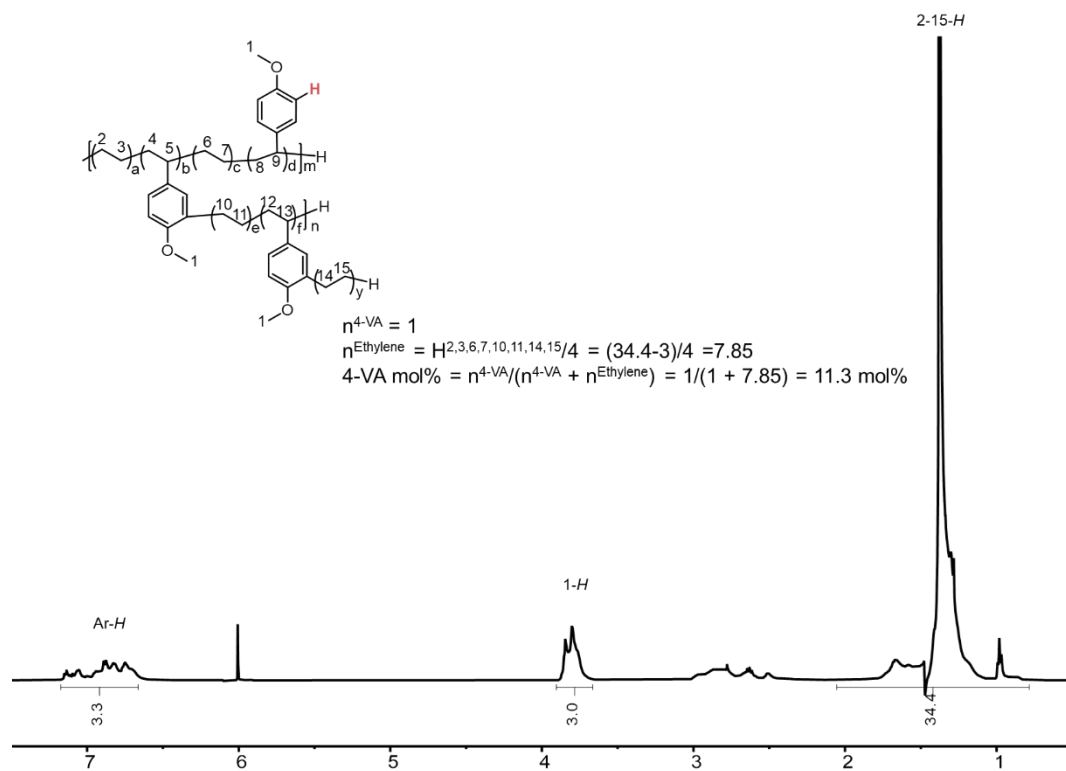

**Figure S87.**  $^1\text{H}$  NMR spectrum of the polymer from Table S1, Entry 5 (1,1,2,2-Tetrachloroethane- $d_2$ ).

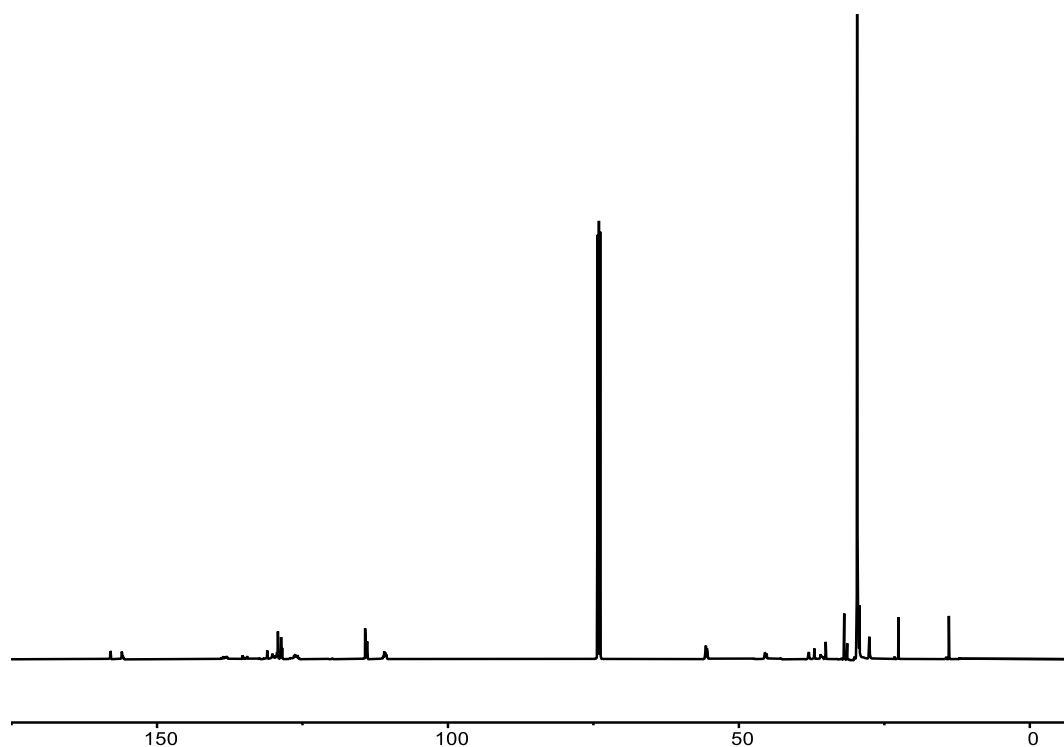

**Figure S88.**  $^{13}\text{C}$  NMR spectrum of the polymer from Table S1, Entry 5 (1,1,2,2-Tetrachloroethane- $d_2$ ).

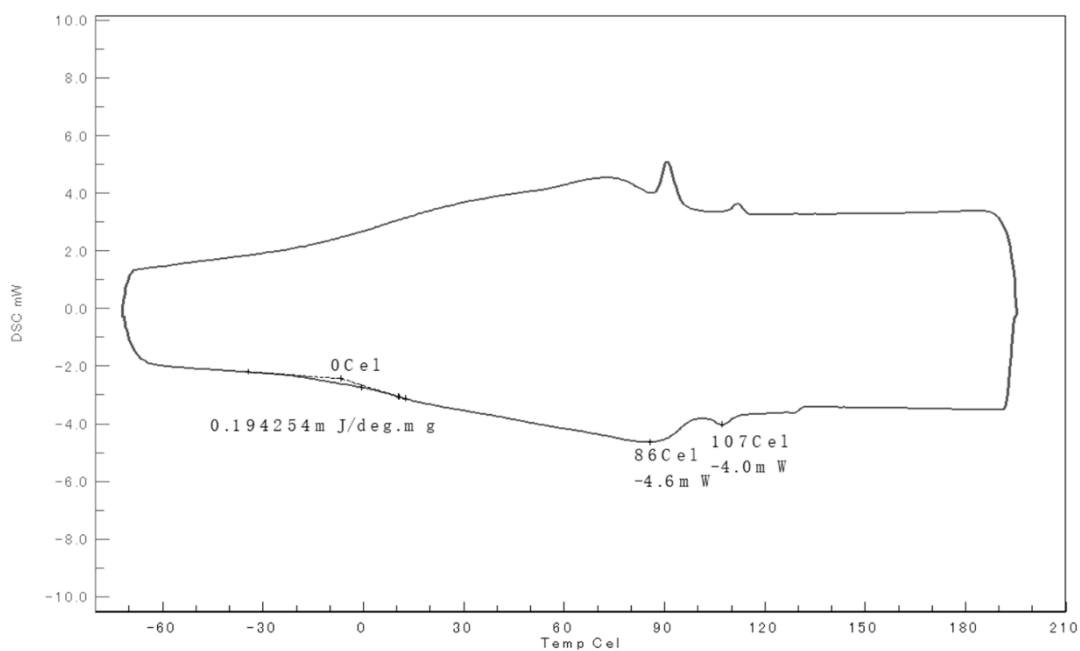

**Figure S89.** DSC curve of the polymer from Table S1, Entry 5.

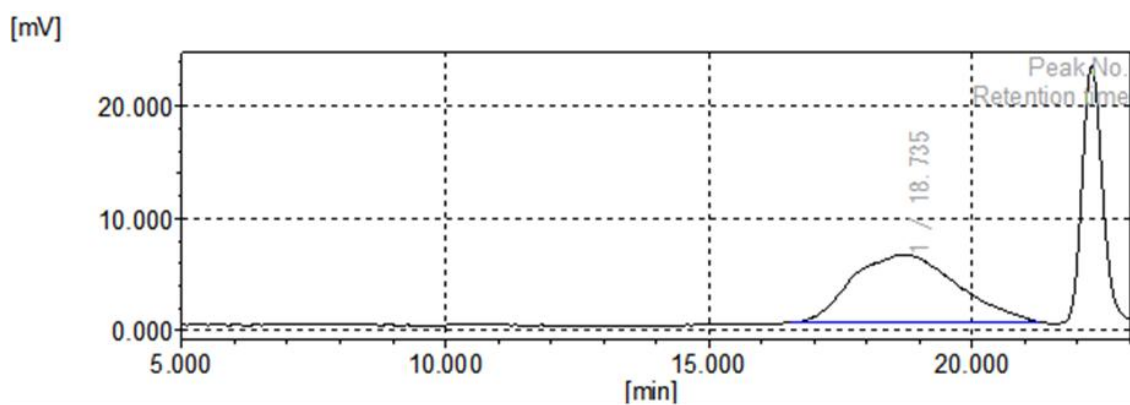

**Molecular mass calculation result (RI)**

Total

|             | [min]  | [mV]  | [mol]       | Mn      | 13,111 |
|-------------|--------|-------|-------------|---------|--------|
| Peak start  | 16.558 | 0.687 | 187,776     | Mw      | 29,029 |
| Peak top    | 18.735 | 6.784 | 21,512      | Mz      | 50,016 |
| Peak end    | 21.302 | 0.752 | 947         | Mz+1    | 70,388 |
|             |        |       |             | Mv      | 29,029 |
| Height [mV] |        |       | 6.067       | Mp      | 21,512 |
| Area [mV*s] |        |       | 840.962     | Mz/Mw   | 1.723  |
| Height% [%] |        |       | 100.000     | Mw/Mn   | 2.214  |
| [eta]       |        |       | 29028.86053 | Mz+1/Mw | 2.425  |

**Figure S90.** GPC trace of the polymer from Table S1, Entry 5.

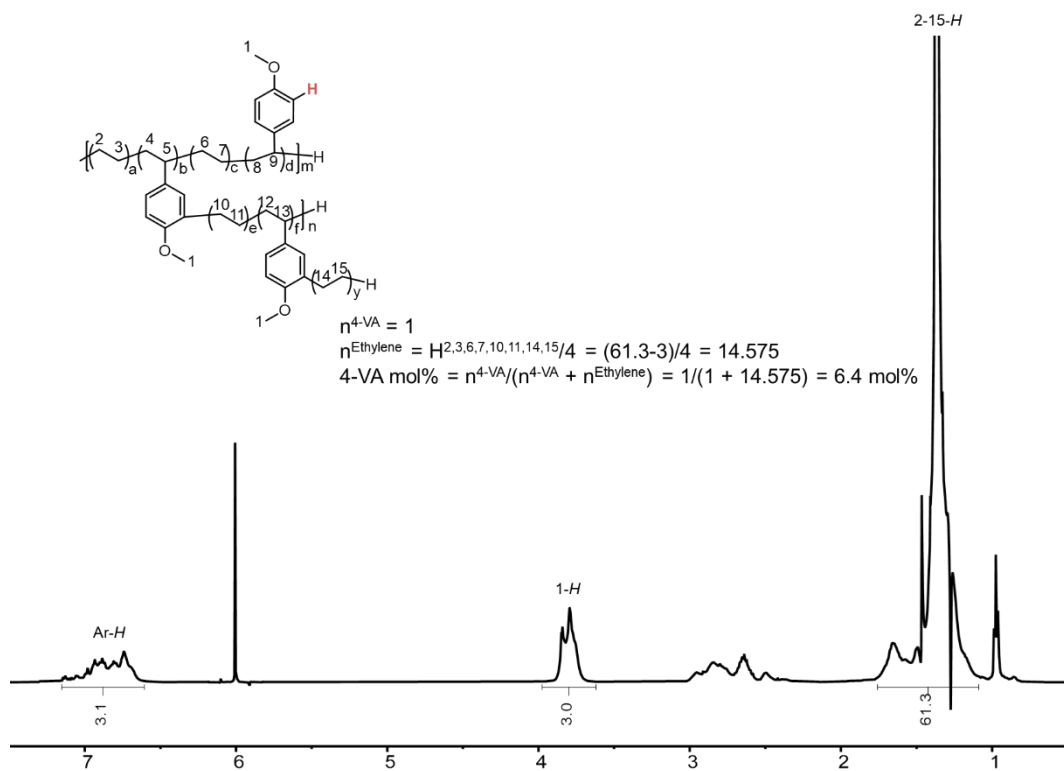

**Figure S91.**  $^1\text{H}$  NMR spectrum of the polymer from Table S1, Entry 6 (1,1,2,2-Tetrachloroethane- $d_2$ ).

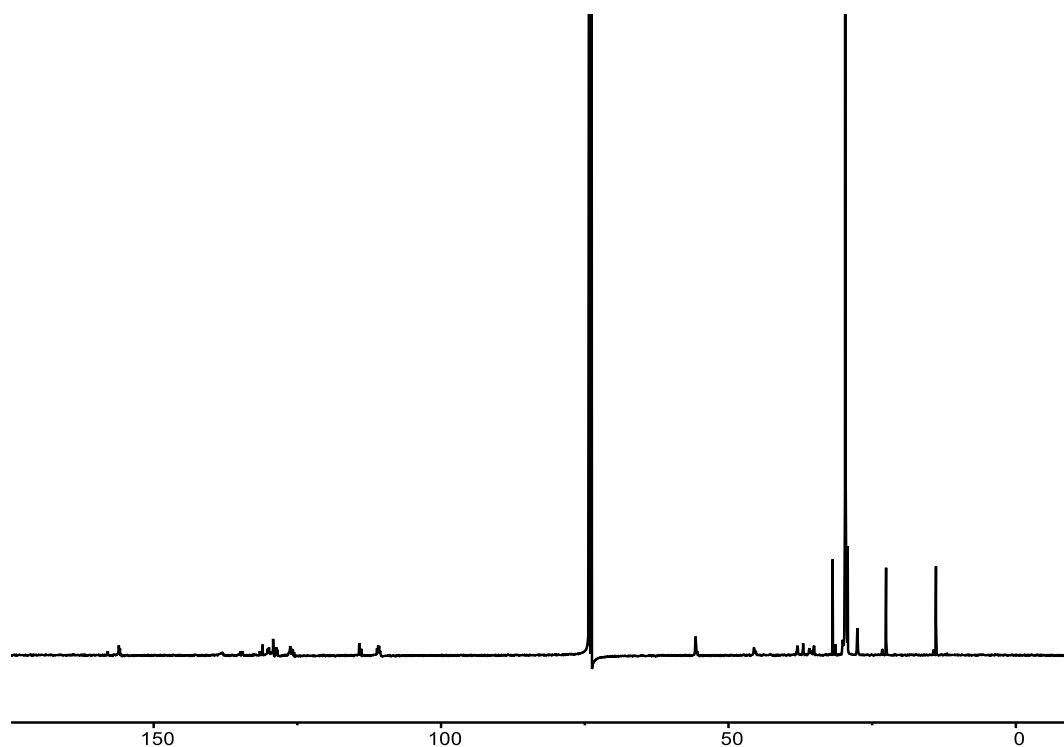

**Figure S92.**  $^{13}\text{C}$  NMR spectrum of the polymer from Table S1, Entry 6 (1,1,2,2-Tetrachloroethane- $d_2$ ).

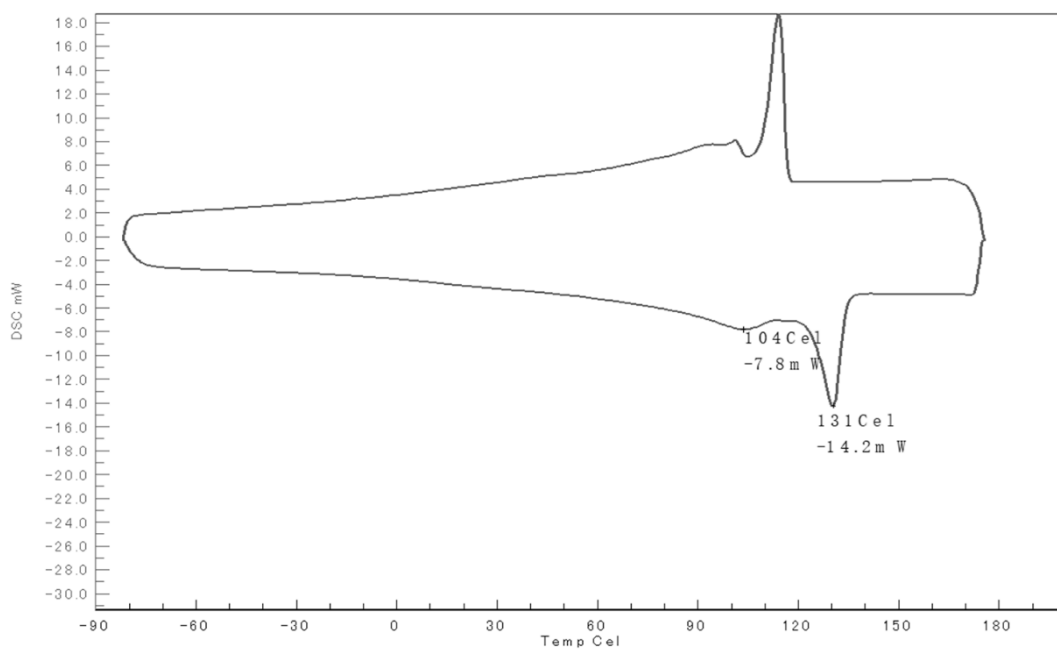

**Figure S93.** DSC curve of the polymer from Table S1, Entry 6.

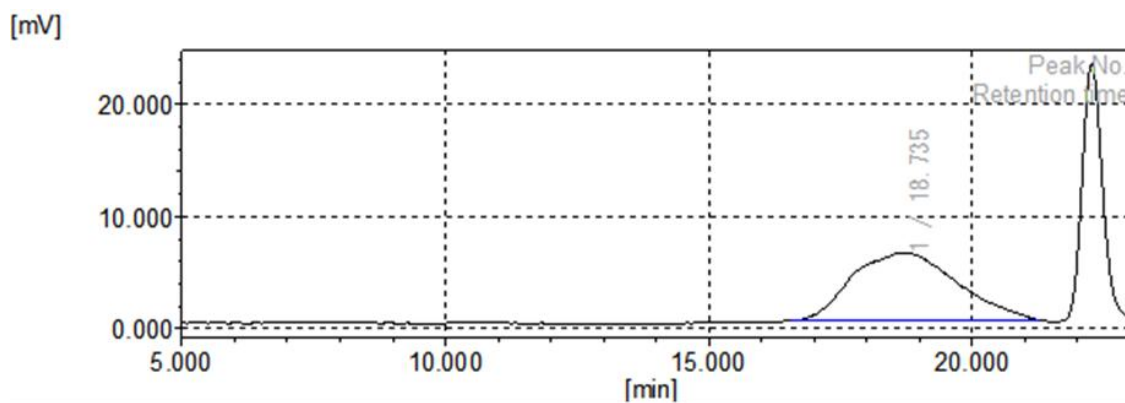

**Molecular mass calculation result (RI)**

| Total       |        |        |             |         |         |
|-------------|--------|--------|-------------|---------|---------|
|             | [min]  | [mV]   | [mol]       |         |         |
| Peak start  | 15.698 | 1.728  | 391,551     | Mn      | 17,747  |
| Peak top    | 18.742 | 11.195 | 21,368      | Mw      | 43,783  |
| Peak end    | 20.993 | 2.580  | 1,633       | Mz      | 92,156  |
|             |        |        |             | Mz+1    | 144,634 |
|             |        |        |             | Mv      | 43,783  |
| Height [mV] |        |        | 8.977       | Mp      | 21,368  |
| Area [mV*s] |        |        | 1322.287    | Mz/Mw   | 2.105   |
| Height% [%] |        |        | 100.000     | Mw/Mn   | 2.467   |
| [eta]       |        |        | 43782.98036 | Mz+1/Mw | 3.303   |

**Figure S94.** GPC trace of the polymer from Table S1, Entry 6.

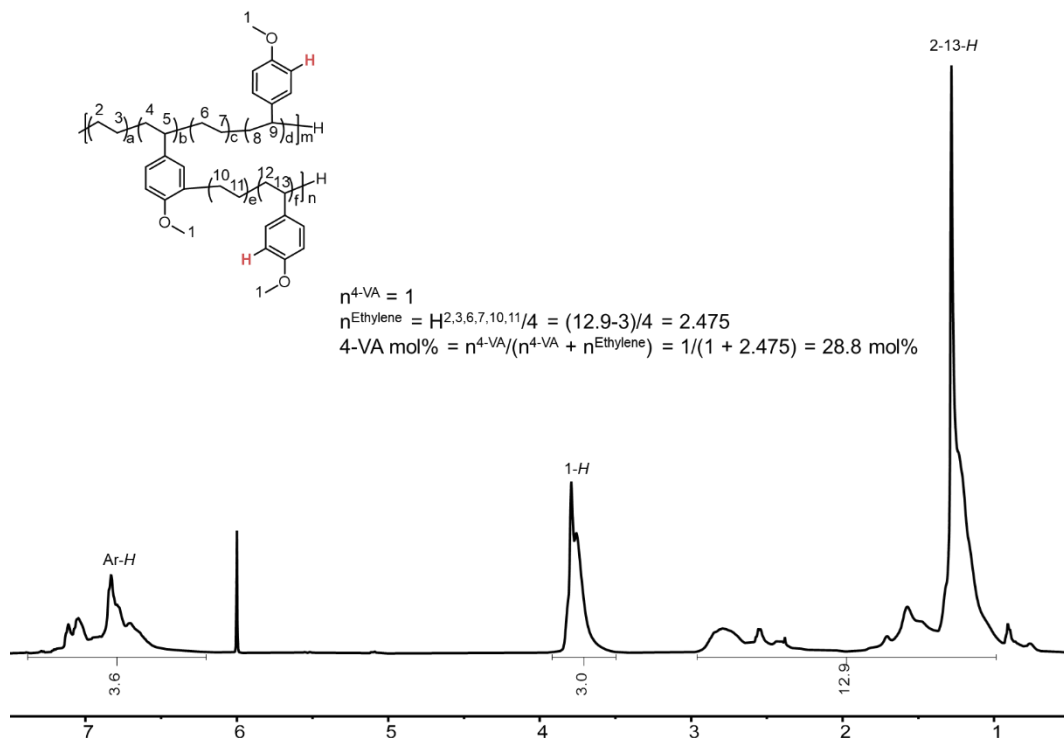

**Figure S95.**  $^1\text{H}$  NMR spectrum of the polymer from Table S1, Entry 7 (1,1,2,2-Tetrachloroethane- $d_2$ ).

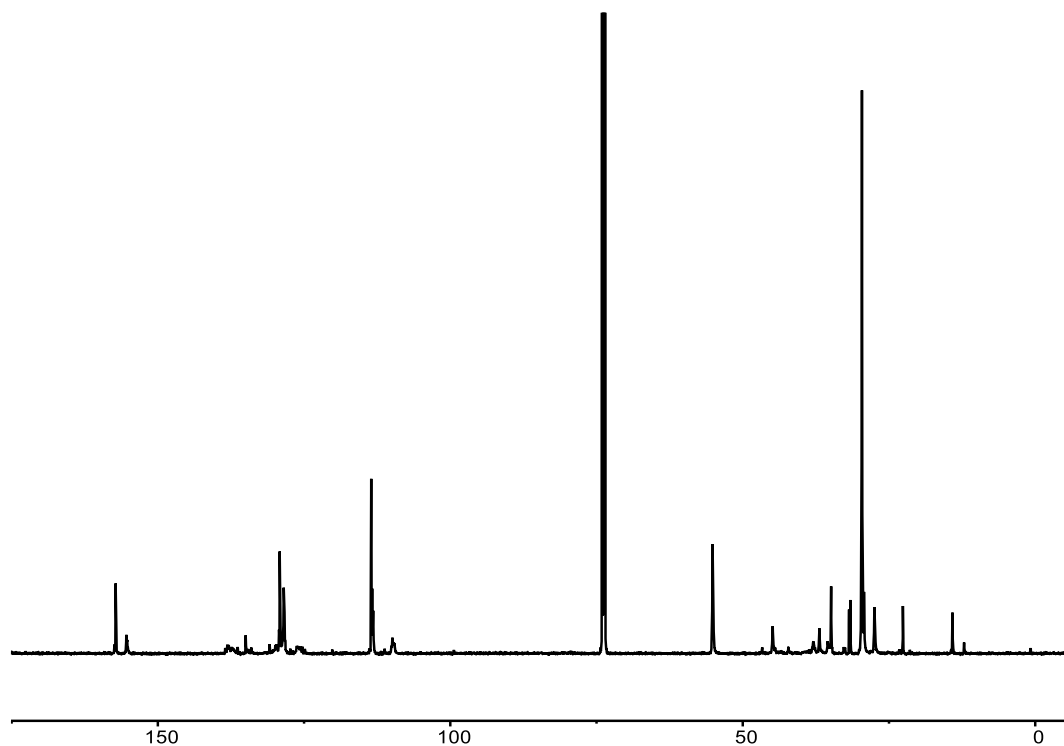

**Figure S96.**  $^{13}\text{C}$  NMR spectrum of the polymer from Table S1, Entry 7 (1,1,2,2-Tetrachloroethane- $d_2$ ).

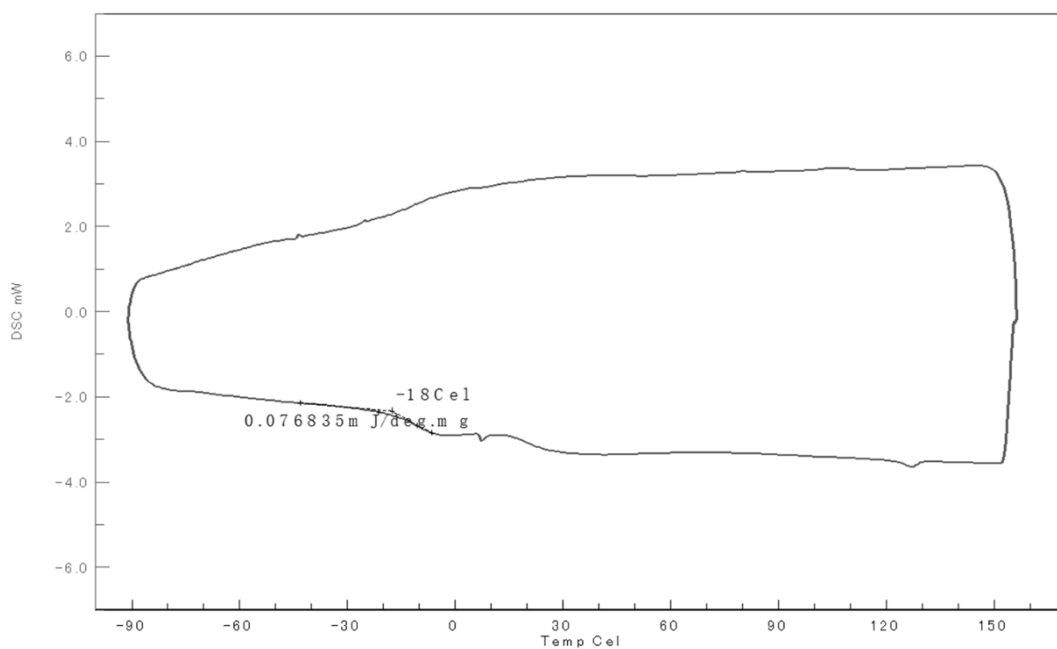

**Figure S97.** DSC curve of the polymer from Table S1, Entry 7.

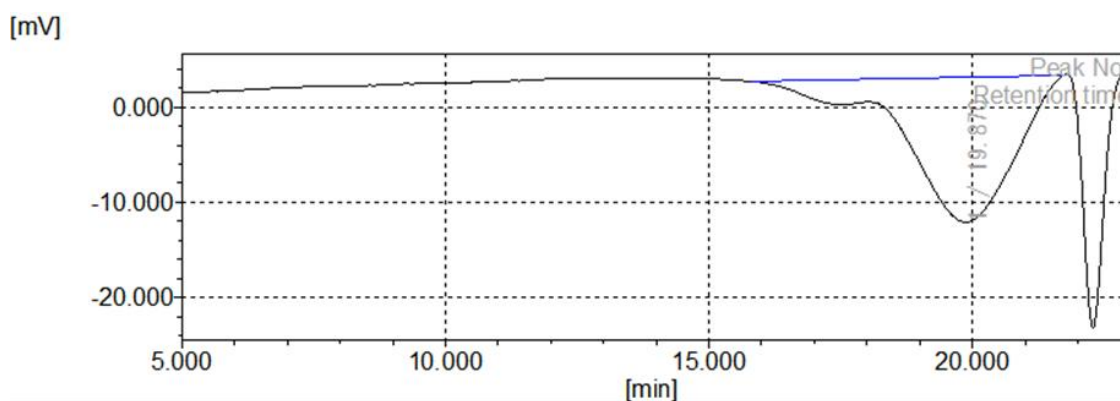

**Molecular mass calculation result (RI)**

Total

|             | [min]  | [mV]    | [mol]       | Mn      | 4.981   |
|-------------|--------|---------|-------------|---------|---------|
| Peak start  | 15.808 | 2.672   | 357,961     | Mw      | 19,007  |
| Peak top    | 19.870 | -12.091 | 6,818       | Mz      | 80,959  |
| Peak end    | 21.720 | 3.312   | 377         | Mz+1    | 150,994 |
|             |        |         |             | Mv      | 19,007  |
| Height [mV] |        |         | 15.203      | Mp      | 7,560   |
| Area [mV*s] |        |         | 2064.623    | Mz/Mw   | 4.259   |
| Height% [%] |        |         | 100.000     | Mw/Mn   | 3.816   |
| [eta]       |        |         | 19006.81265 | Mz+1/Mw | 7.944   |

**Figure S98.** GPC trace of the polymer from Table S1, Entry 7.

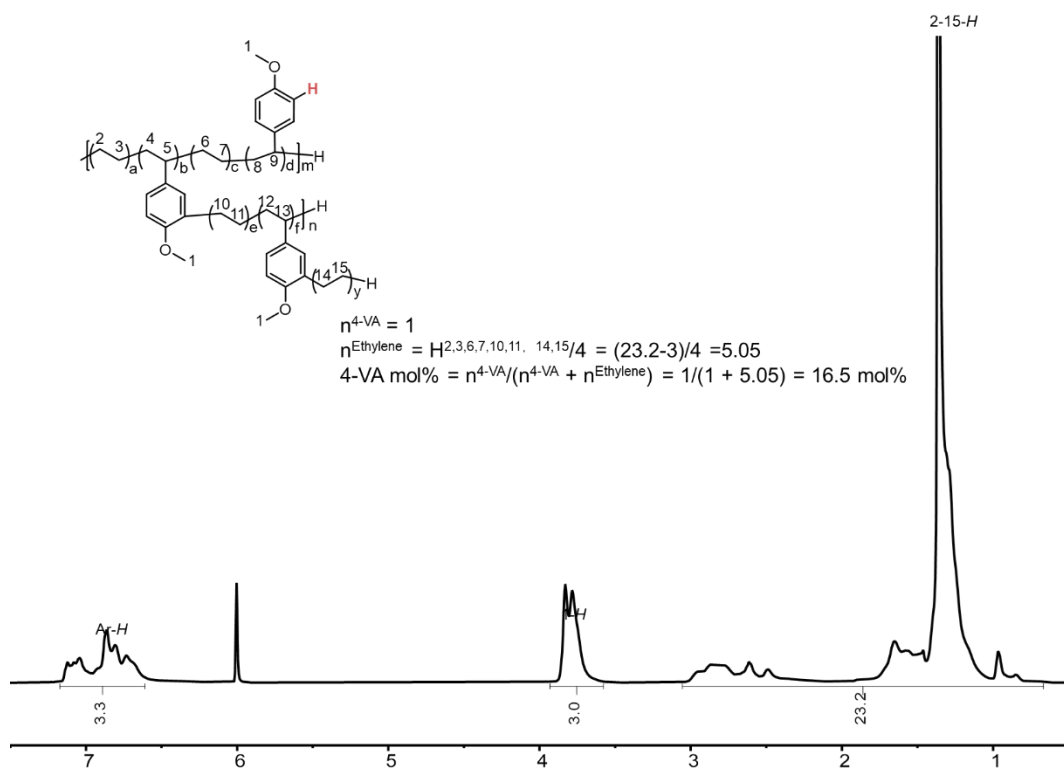

**Figure S99.**  $^1\text{H}$  NMR spectrum of the polymer from Table S1, Entry 8 (1,1,2,2-Tetrachloroethane- $d_2$ ).

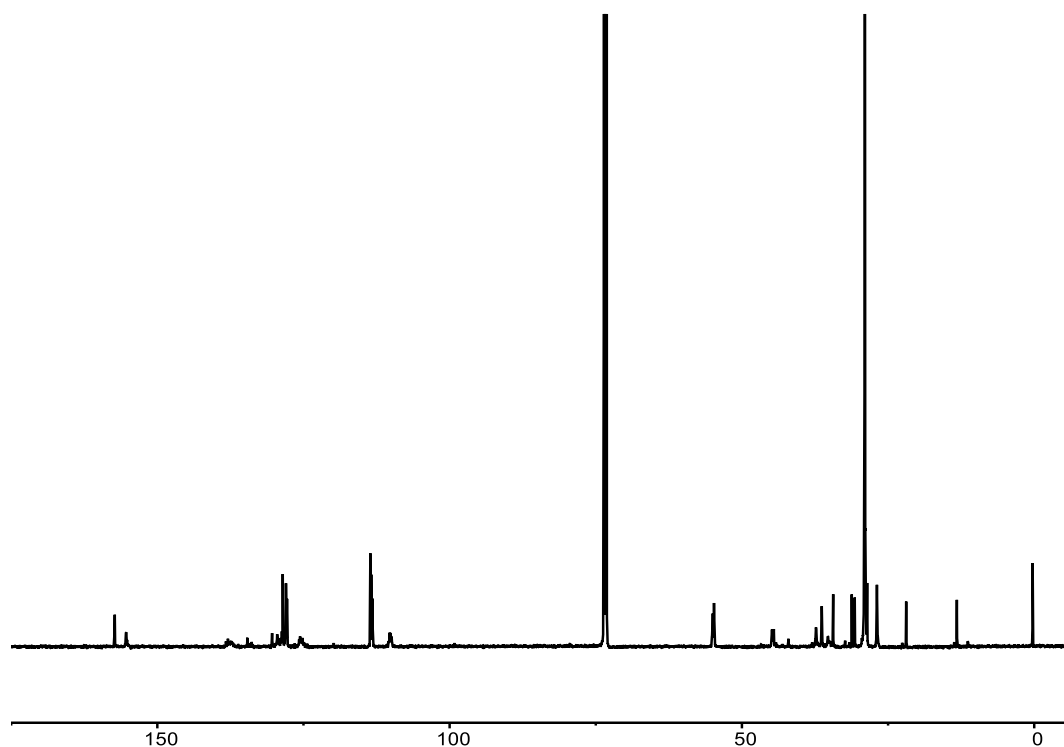

**Figure S100.**  $^{13}\text{C}$  NMR spectrum of the polymer from Table S1, Entry 8 (1,1,2,2-Tetrachloroethane- $d_2$ ).

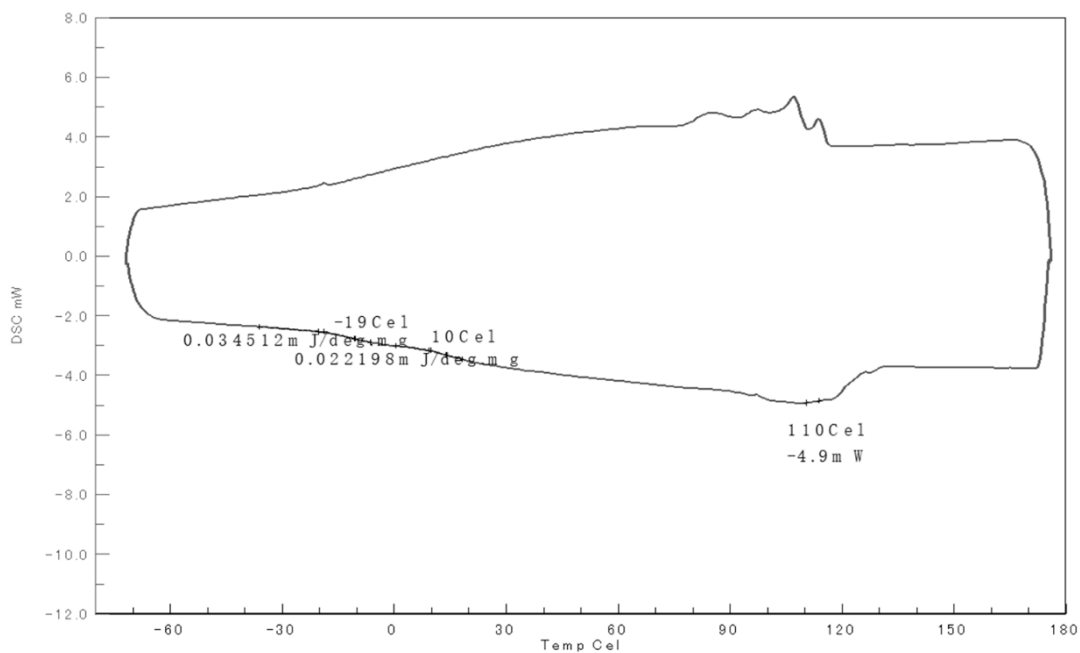

**Figure S101.** DSC curve of the polymer from Table S1, Entry 8.

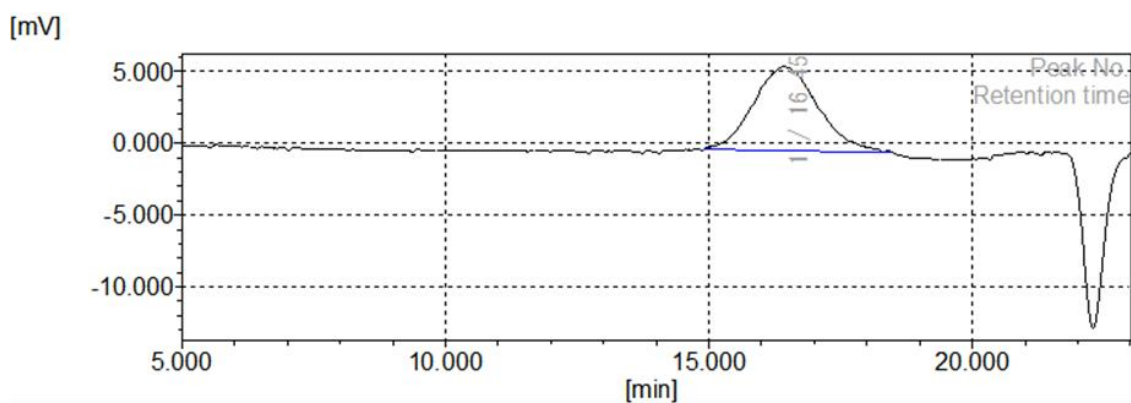

**Molecular mass calculation result (RI)**

| Total       |        |        |              |         |         |
|-------------|--------|--------|--------------|---------|---------|
|             | [min]  | [mV]   | [mol]        |         |         |
| Peak start  | 14.905 | -0.414 | 747,947      | Mn      | 167,574 |
| Peak top    | 16.455 | 5.324  | 206,101      | Mw      | 221,377 |
| Peak end    | 18.478 | -0.657 | 27,898       | Mz      | 275,858 |
|             |        |        |              | Mz+1    | 329,965 |
|             |        |        |              | Mv      | 221,377 |
| Height [mV] |        |        | 5.843        | Mp      | 218,373 |
| Area [mV*s] |        |        | 495.774      | Mz/Mw   | 1.246   |
| Height% [%] |        |        | 100.000      | Mw/Mn   | 1.321   |
| [eta]       |        |        | 221377.11964 | Mz+1/Mw | 1.491   |

**Figure S102.** GPC trace of the polymer from Table S1, Entry 8.

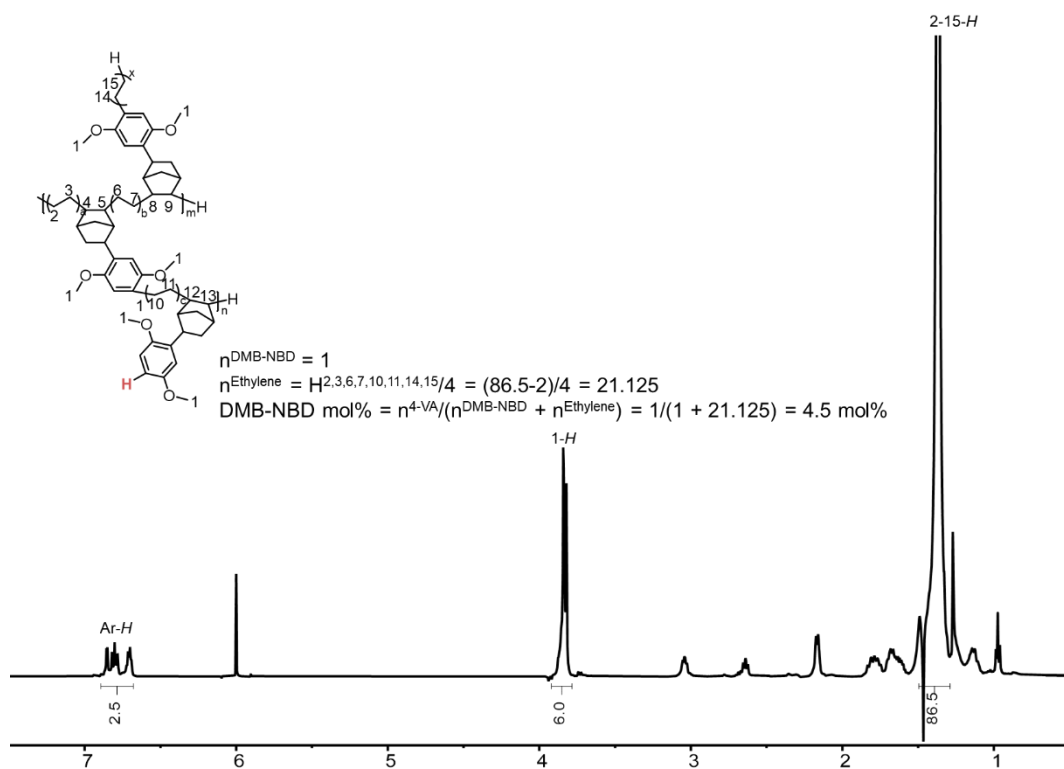

**Figure S103.** <sup>1</sup>H NMR spectrum of the polymer from Table S1, Entry 9 (1,1,2,2-Tetrachloroethane-d<sub>2</sub>).

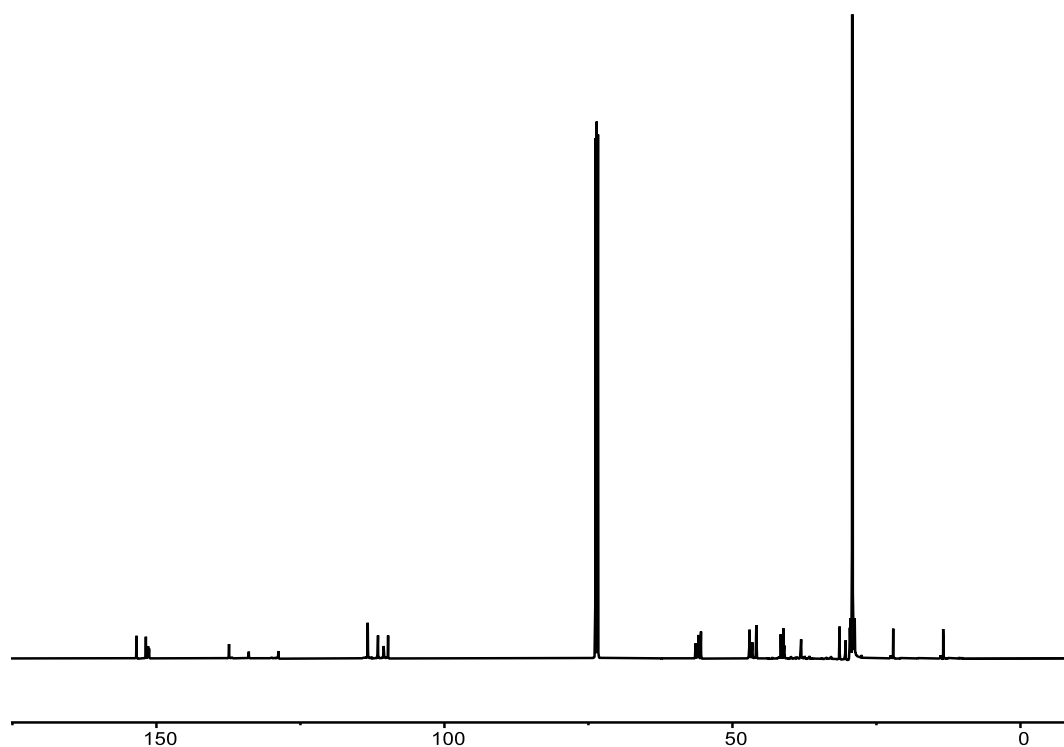

**Figure S104.** <sup>13</sup>C NMR spectrum of the polymer from Table S1, Entry 9 (1,1,2,2-Tetrachloroethane-d<sub>2</sub>).

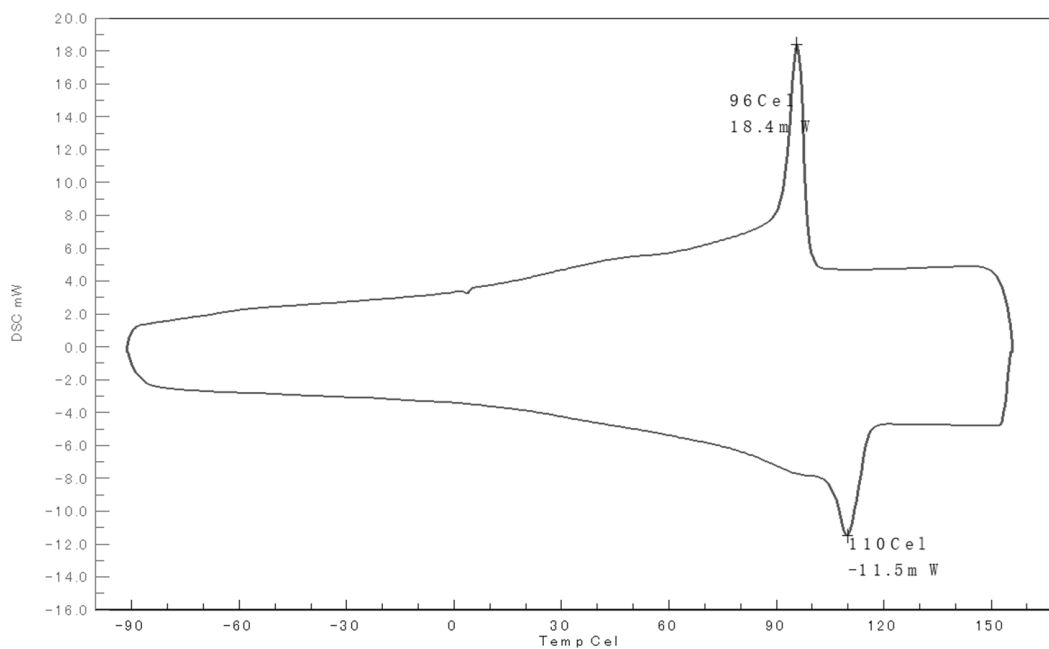

**Figure S105.** DSC curve of the polymer from Table S1, Entry 9.

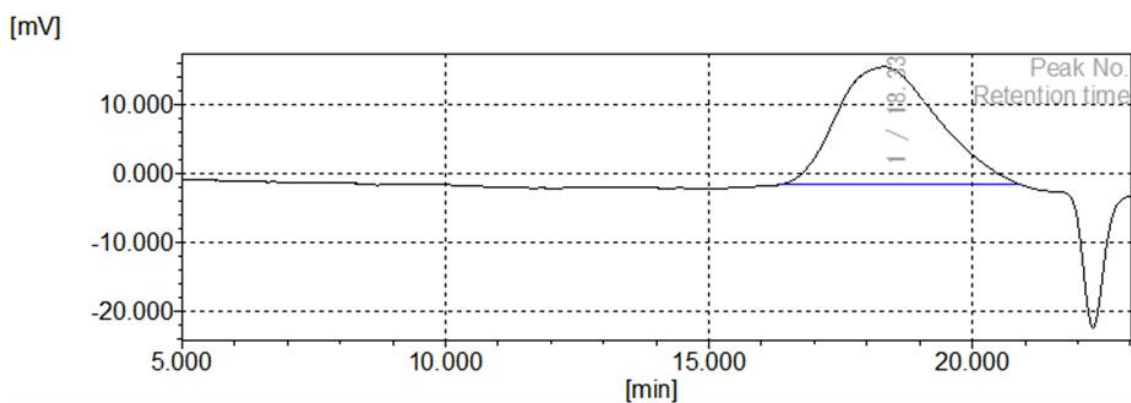

**Molecular mass calculation result (RI)**

Total

|             | [min]  | [mV]   | [mol]       | Mn      | 19,176 |
|-------------|--------|--------|-------------|---------|--------|
| Peak start  | 16.317 | -1.656 | 232,937     | Mw      | 38,946 |
| Peak top    | 18.338 | 15.554 | 32,175      | Mz      | 64,516 |
| Peak end    | 20.905 | -1.561 | 1,878       | Mz+1    | 89,490 |
|             |        |        |             | Mv      | 38,946 |
| Height [mV] |        |        | 17.168      | Mp      | 32,176 |
| Area [mV*s] |        |        | 2278.908    | Mz/Mw   | 1.657  |
| Height% [%] |        |        | 100.000     | Mw/Mn   | 2.031  |
| [eta]       |        |        | 38946.21754 | Mz+1/Mw | 2.298  |

**Figure S106.** GPC trace of the polymer from Table S1, Entry 9.

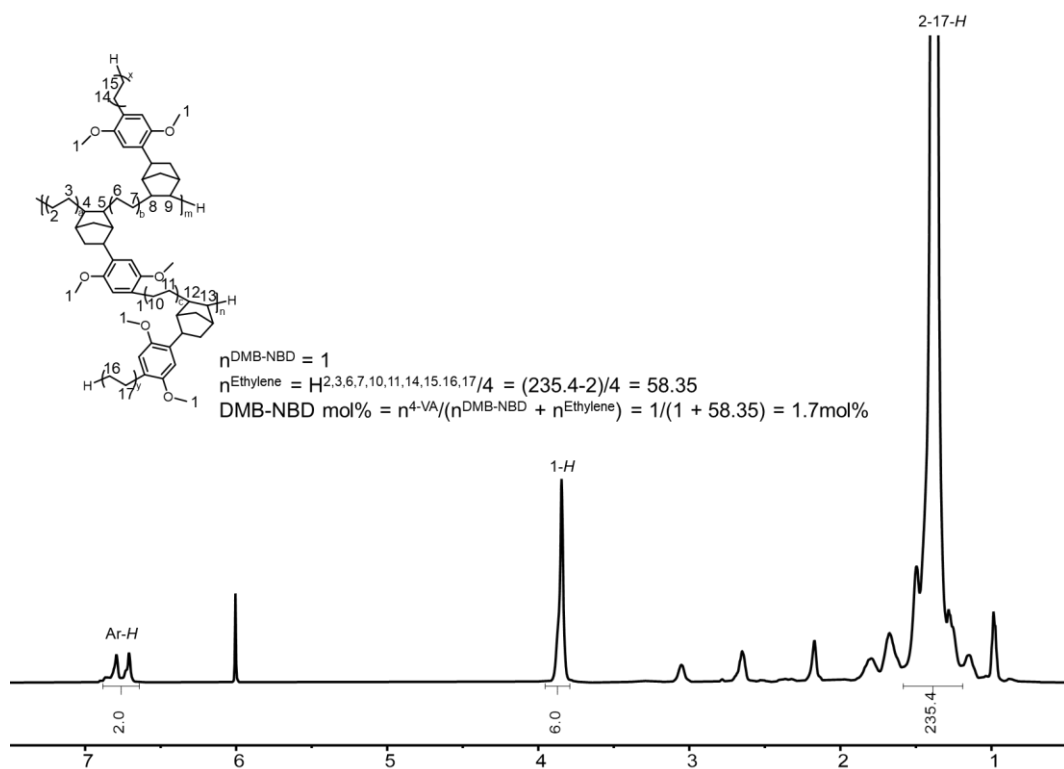

**Figure S107.**  $^1\text{H}$  NMR spectrum of the polymer from Table S1, Entry 10 (1,1,2,2-Tetrachloroethane- $d_2$ ).

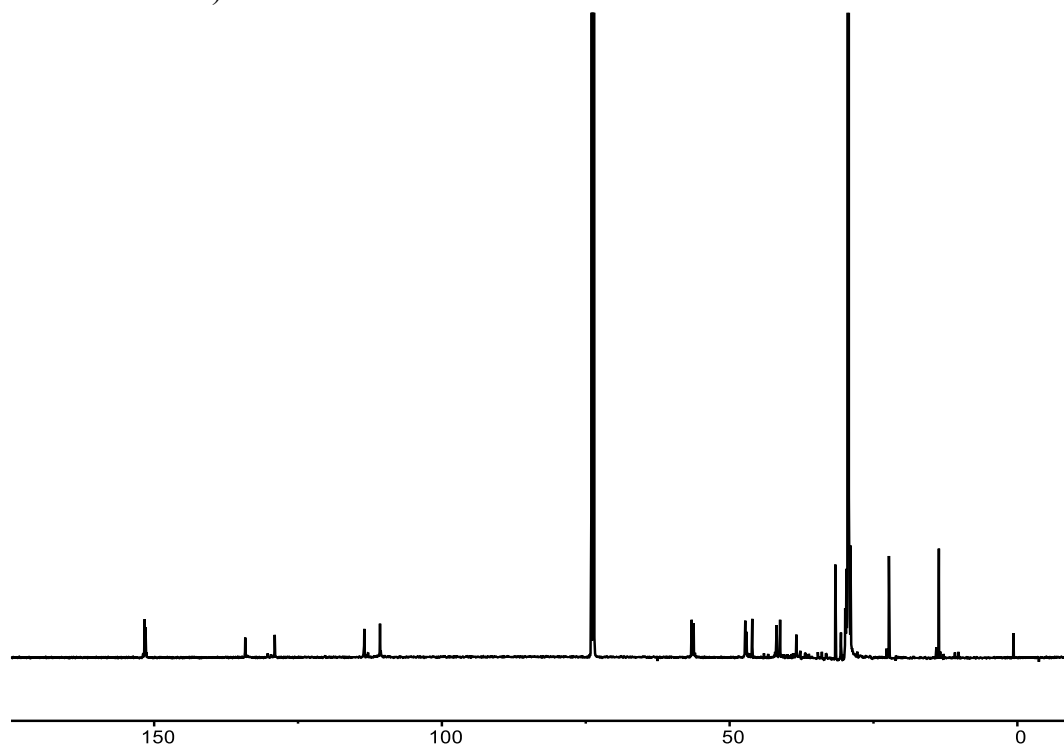

**Figure S108.**  $^{13}\text{C}$  NMR spectrum of the polymer from Table S1, Entry 10 (1,1,2,2-Tetrachloroethane- $d_2$ ).

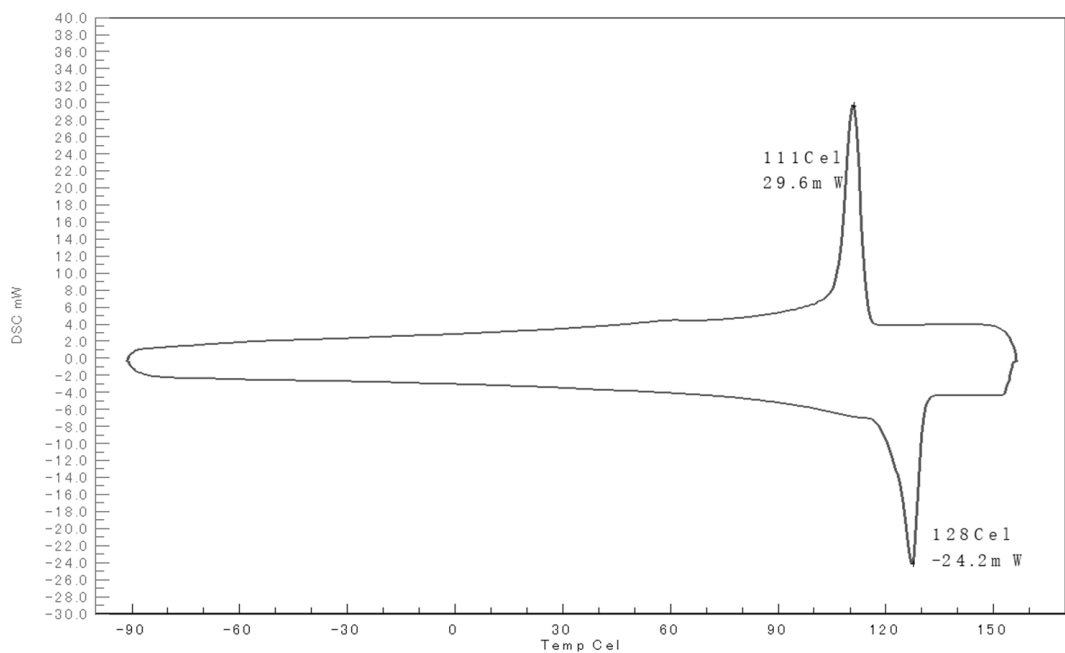

**Figure S109.** DSC curve of the polymer from Table S1, Entry 10.

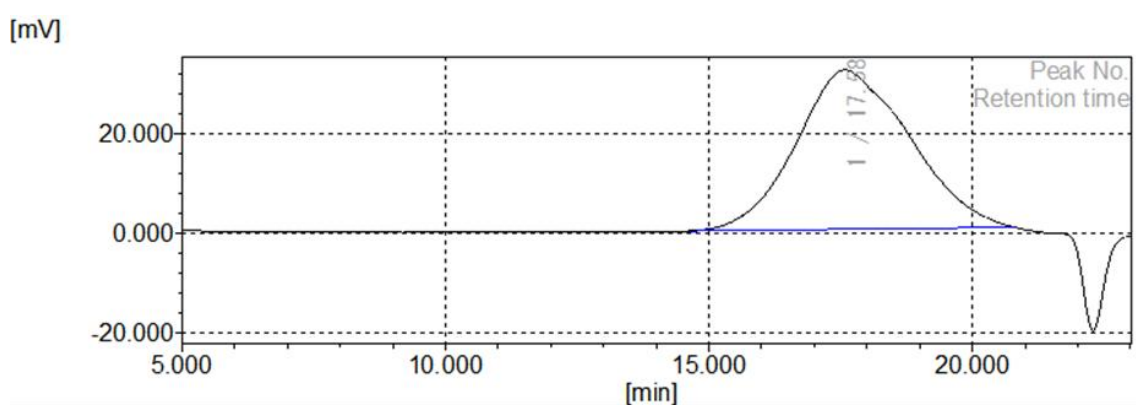

**Molecular mass calculation result (RI)**

| Total       | [min]  | [mV]   | [mol]       | Mn      | 33,124  |
|-------------|--------|--------|-------------|---------|---------|
| Peak start  | 14.640 | 0.484  | 945,001     | Mw      | 86,171  |
| Peak top    | 17.585 | 32.875 | 69,483      | Mz      | 175,353 |
| Peak end    | 20.793 | 1.229  | 2,220       | Mz+1    | 282,042 |
|             |        |        |             | Mv      | 86,171  |
| Height [mV] |        |        | 32.034      | Mp      | 71,627  |
| Area [mV*s] |        |        | 4793.469    | Mz/Mw   | 2.035   |
| Height% [%] |        |        | 100.000     | Mw/Mn   | 2.601   |
| [eta]       |        |        | 86170.50781 | Mz+1/Mw | 3.273   |

**Figure S110.** GPC trace of the polymer from Table S1, Entry 10.

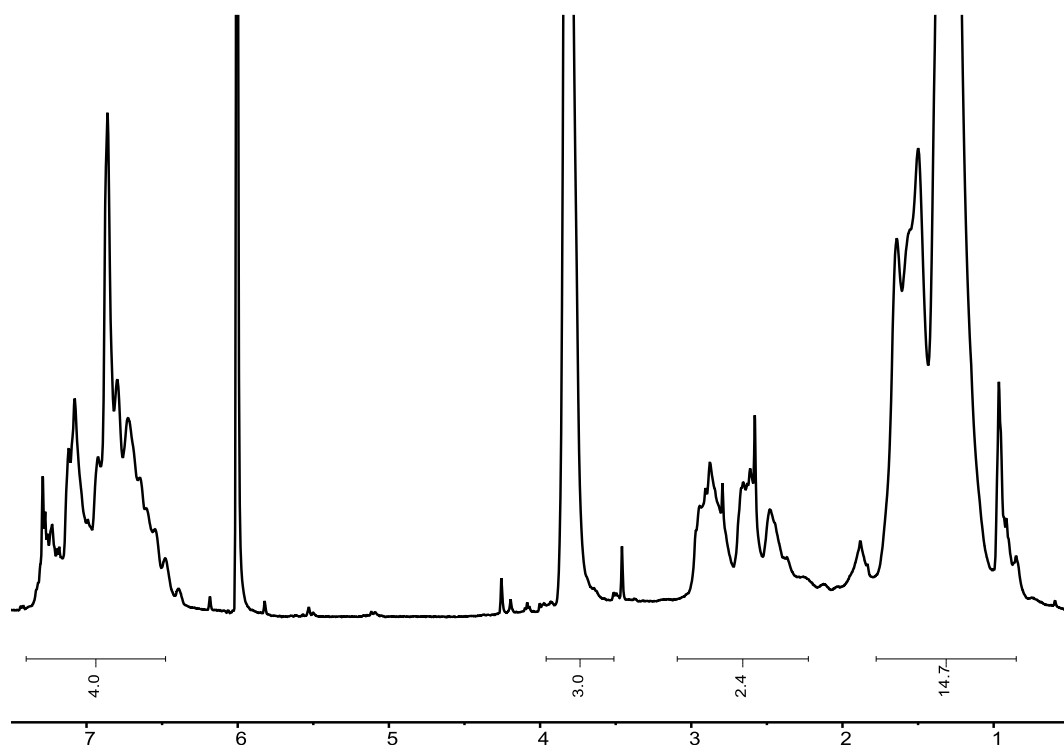

**Figure S111.** <sup>1</sup>H NMR spectrum of the oligomers of 4-VA and ethylene after reacting at 70°C for 10 minutes (1,1,2,2-Tetrachloroethane-d<sub>2</sub>).

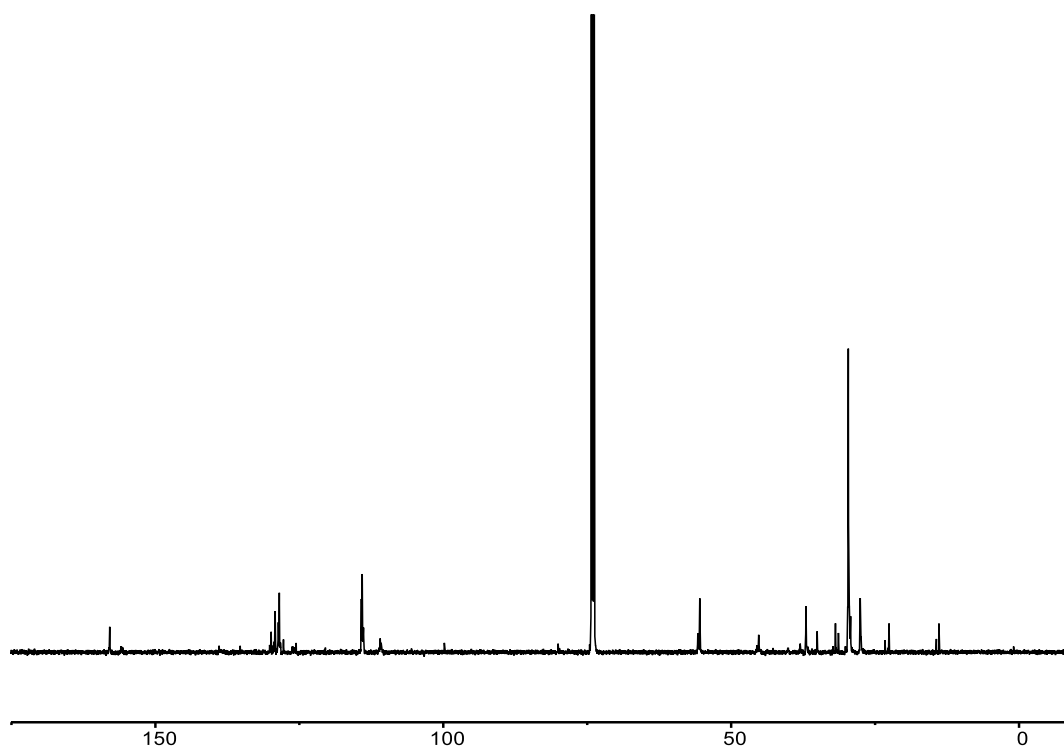

**Figure S112.** <sup>13</sup>C NMR spectrum of the oligomers of 4-VA and ethylene after reacting at 70°C for 10 minutes (1,1,2,2-Tetrachloroethane-d<sub>2</sub>).

## References

- [1] Li, X.; Nishiura, M.; Mori, K.; Mashiko, T., Hou, Z. *Chem. Commun.* **2007**, 4137-4139.
- [2] Nishiura, M.; Baldamus, J.; Shima, T.; Mori, K., Hou, Z. *Chem. Eur. J.* **2011**, 17, 5033-5044.
- [3] Jiang, Y., Yorimitsu, H., *JACS Au* **2022**, 11, 2514-2521.
- [4] Cox, J., Kang, H., Igarashi, T., Swager, T., *ACS Macro Lett.* **2012**, 1, 334-337.
